# Supplementary material for: TFA-promoted sulfonation/cascade cyclization of 2-propynolphenols with sodium sulfinates to 4-sulfonyl 2H-chromenes under metal-free conditions
Source: Royal Society of Chemistry journal article supplement (doi:10.1039/c9qo00712a), 2019-01-01

# TFA-Promoted Sulfonation/Cascade Cyclization of 2-Propynolphenols with Sodium Sulfinates to 4-Sulfonyl 2*H*-Chromenes under Metal-Free Conditions

Tao Yang,<sup>a</sup> Peihao Kou,<sup>a</sup> Fengyan Jin,<sup>a</sup> Xian-Rong Song,<sup>\*a</sup> Jiang Bai,<sup>a</sup> Haixin Ding,<sup>a</sup> Qiang Xiao,<sup>\*a</sup> Yong-Min Liang<sup>b</sup>

<sup>a</sup> *Institute of Organic Chemistry, Jiangxi Science & Technology Normal University, Key Laboratory of Organic Chemistry, Jiangxi Province, Nanchang 330013, China*

<sup>b</sup> *State Key Laboratory of Applied Organic Chemistry, Lanzhou University, Lanzhou 730000, China*

## Table of Contents

|          |                                                                                                                |                |
|----------|----------------------------------------------------------------------------------------------------------------|----------------|
| <b>1</b> | <b>General Remarks</b>                                                                                         | <b>S2</b>      |
| <b>2</b> | <b>General procedure for the preparation of product 3, 5</b>                                                   | <b>S2</b>      |
| <b>3</b> | <b>Characterization data of 3a-3o, 3p'-3q', 5a-5f, 5g'-5h', 3aa-3ad,</b>                                       | <b>S3-S20</b>  |
| <b>4</b> | <b>Crystal preparation and X-ray diffraction analysis of compound 3a</b>                                       | <b>S21</b>     |
| <b>5</b> | <b><sup>1</sup>H NMR and <sup>13</sup>C NMR spectra for compounds 3a-3o, 3p'-3q', 5a-5f, 5g'-5h', 3aa-3ad,</b> | <b>S22-S79</b> |

**General Remarks:**

Column chromatography was carried out on silica gel.  $^1\text{H}$  NMR spectra were recorded on 400 MHz in  $\text{CDCl}_3$ ,  $^{13}\text{C}$  NMR spectra were recorded on 100 MHz in  $\text{CDCl}_3$  using TMS as internal standard. IR spectra were recorded on an FT-IR spectrometer and only major peaks are reported in  $\text{cm}^{-1}$ . Melting points were determined on a microscopic apparatus and were uncorrected. All products were further characterized by HRMS (high resolution mass spectra); copies of their  $^1\text{H}$  NMR and  $^{13}\text{C}$  NMR spectra are provided. Solvents were dried under standard method. The petroleum ether was bought from Shanghai Titan Scientific Company in a plastic bucket.

**General procedure for the preparation of product 4-sulfonates**

**2*H*-chromenes 3 and 5:** The mixture of 2-propynolphenols (**1** or **4**) (0.1 mmol), sodium sulfinates **2** (0.2 mmol), TFA (0.15 mmol) in  $\text{CH}_3\text{NO}_2$  (1.0 mL) was stirred at  $80^\circ\text{C}$ . After 6.0 h, the completion of the reaction was monitored by TLC. Then, the solvent was concentrated and the residue was purified by flash chromatography on silica gel to afford **3** or **5**.

### 2,2-diphenyl-4-tosyl-2*H*-chromene (3a):

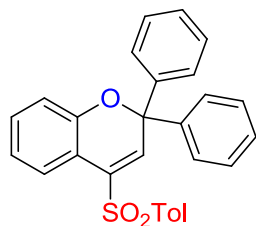

The resultant residue was purified by flash silica gel column chromatography to afford **3a** as a white solid; mp: 202–204 °C. <sup>1</sup>H NMR (400 MHz, CDCl<sub>3</sub>): δ 2.30 (s, 3 H), 6.75 (t, *J* = 7.6 Hz, 1 H), 6.85 (d, *J* = 8.0 Hz, 1 H), 7.06 (t, *J* = 8.0 Hz, 1 H), 7.18 – 7.28 (m, 8 H), 7.31 – 7.35 (m, 5 H), 7.69 – 7.73 (m, 3 H). <sup>13</sup>C{H} NMR (100 MHz, CDCl<sub>3</sub>): δ 21.6, 82.7, 115.4, 117.5, 121.7, 125.1, 126.8, 127.8, 128.2, 128.4, 129.9, 131.1, 135.9, 136.9, 137.1, 142.6, 144.6, 152.5. HRMS (ESI, *m/z*): calcd for C<sub>28</sub>H<sub>23</sub>O<sub>3</sub>S: [M+H]<sup>+</sup> = 439.1362; found: 439.1357.

### 2,2-di-*p*-tolyl-4-tosyl-2*H*-chromene (3b):

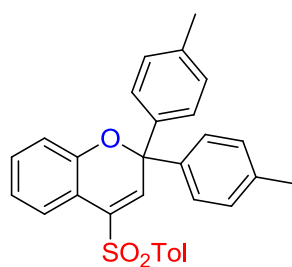

The resultant residue was purified by flash silica gel column chromatography to afford **3b** as a white solid; mp: 192–194 °C. <sup>1</sup>H NMR (400 MHz, CDCl<sub>3</sub>): 2.24 (s, 6 H), 2.30 (s, 3 H), 6.71 – 6.75 (m, 1 H), 6.82 – 6.84 (m, 1 H), 7.02 – 7.06 (m, 5 H), 7.17 – 7.20 (m, 6 H), 7.32 (s, 1 H), 7.68 – 7.73 (m, 3 H). <sup>13</sup>C{H} NMR

(100 MHz, CDCl<sub>3</sub>): δ 21.1, 21.6, 82.6, 115.4, 117.5, 121.6, 125.0, 126.8, 127.8, 129.1, 129.9, 131.0, 135.6, 137.0, 137.5, 137.9, 139.9, 144.5, 152.6. HRMS (ESI, m/z): calcd for C<sub>30</sub>H<sub>27</sub>O<sub>3</sub>S: [M+H]<sup>+</sup> = 467.1675; found: 467.1673.

**2,2-bis(4-methoxyphenyl)-4-tosyl-2H-chromene (3c):**

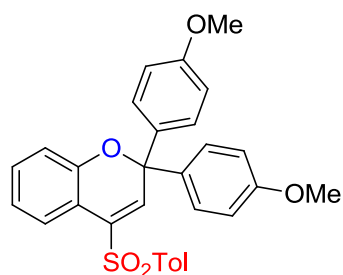

The resultant residue was purified by flash silica gel column chromatography to afford **3c** as a white solid; mp: 198–200 °C. <sup>1</sup>H NMR (400 MHz, CDCl<sub>3</sub>): δ 2.29 (s, 3 H), 3.67 (s, 6 H), 6.73 – 6.77 (m, 3 H), 6.85 – 6.89 (m, 5 H), 7.04 – 7.08 (m, 1 H), 7.14 – 7.20 (m, 4 H), 7.32 (s, 1 H), 7.69 – 7.73 (m, 3 H). <sup>13</sup>C{H} NMR (100 MHz, CDCl<sub>3</sub>): δ 21.6, 55.2, 82.4, 112.9, 113.4, 115.4, 117.5, 119.2, 121.7, 125.1, 127.8, 129.5, 129.9, 131.1, 135.8, 136.9, 144.1, 144.6, 152.5, 159.6. HRMS (ESI, m/z): calcd for C<sub>30</sub>H<sub>27</sub>O<sub>5</sub>S: [M+H]<sup>+</sup> = 499.1574; found: 499.1570.

**2,2-bis(4-chlorophenyl)-4-tosyl-2H-chromene (3d):**

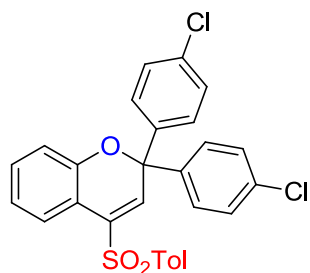

The resultant residue was purified by flash silica gel column chromatography to afford **3d** as a white solid; mp: 68–70 °C.  $^1\text{H}$  NMR (400 MHz,  $\text{CDCl}_3$ ):  $\delta$  2.38 (s, 3 H), 6.84 – 6.91 (m, 2 H), 7.13 – 7.17 (m, 1 H), 7.27 – 7.31 (m, 11 H), 7.77 – 7.83 (m, 3 H).  $^{13}\text{C}\{\text{H}\}$  NMR (100 MHz,  $\text{CDCl}_3$ ):  $\delta$  21.6, 81.8, 115.4, 117.5, 122.2, 125.2, 127.8, 128.2, 128.8, 130.0, 131.4, 134.5, 135.7, 136.6, 136.8, 140.8, 144.9, 152.1. HRMS (ESI,  $m/z$ ): calcd for  $\text{C}_{28}\text{H}_{21}\text{Cl}_2\text{O}_3\text{S}$ :  $[\text{M}+\text{H}]^+ = 507.0583$ ; found: 507.0585.

**2,2-bis(4-fluorophenyl)-4-tosyl-2H-chromene (3e):**

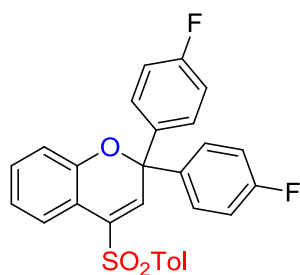

The resultant residue was purified by flash silica gel column chromatography to afford **3e** as a white solid; mp: 177–179 °C.  $^1\text{H}$  NMR (400 MHz,  $\text{CDCl}_3$ ):  $\delta$  2.38 (s, 3 H), 6.83 – 6.91 (m, 2 H), 7.03 (t,  $J = 8.4$  Hz, 4 H), 7.15 (t,  $J = 8.0$  Hz, 1 H), 7.25 – 7.37 (m, 7 H), 7.78 – 7.82 (m, 3 H).  $^{13}\text{C}\{\text{H}\}$  NMR (100 MHz,  $\text{CDCl}_3$ ):  $\delta$  21.6, 81.9, 115.3, 115.4, 115.6, 117.5, 122.0, 125.2, 127.8, 128.7, 128.7,

130.0, 131.3, 136.3, 136.4, 136.7, 138.3, 138.3, 144.8, 152.2, 161.2, 163.7.

HRMS (ESI, m/z): calcd for C<sub>28</sub>H<sub>21</sub>F<sub>2</sub>O<sub>3</sub>S: [M+H]<sup>+</sup> = 475.1174; found: 475.1169.

**2-(4-fluorophenyl)-2-(4-methoxyphenyl)-4-tosyl-2H-chromene (3f):**

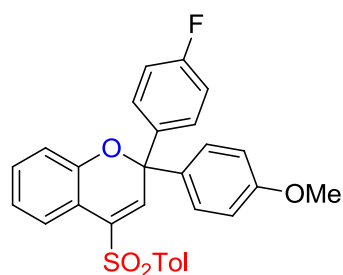

The resultant residue was purified by flash silica gel column chromatography to afford **3f** as a white solid; mp: 157–159 °C. <sup>1</sup>H NMR (400 MHz, CDCl<sub>3</sub>): δ 2.29 (s, 3 H), 3.69 (s, 3 H), 6.73 – 6.82 (m, 4 H), 6.93 (t, *J* = 8.4 Hz, 2 H), 7.03 – 7.07 (m, 1 H), 7.17 – 7.20 (m, 4 H), 7.26 – 7.30 (m, 3 H), 7.71 (d, *J* = 8.0 Hz, 3 H). <sup>13</sup>C{H} NMR (100 MHz, CDCl<sub>3</sub>): δ 21.5, 55.2, 82.1, 113.9, 115.2, 115.3, 115.4, 117.5, 121.8, 125.1, 127.8, 128.2, 128.7, 128.7, 129.9, 131.2, 134.4, 135.9, 136.8, 136.9, 128.7, 138.8, 144.7, 152.4, 159.5, 161.1, 163.6. HRMS (ESI, m/z): calcd for C<sub>29</sub>H<sub>24</sub>FO<sub>4</sub>S: [M+H]<sup>+</sup> = 487.1374; found: 487.1368.

**2-phenyl-2-(p-tolyl)-4-tosyl-2H-chromene (3g):**

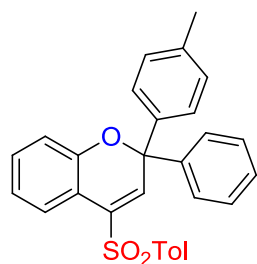

The resultant residue was purified by flash silica gel column chromatography to afford **3g** as a white solid; mp: 196–198 °C. <sup>1</sup>H NMR (400 MHz, CDCl<sub>3</sub>): δ 2.24 (s, 3 H), 2.30 (s, 3 H), 6.74 (t, *J* = 7.6 Hz, 1 H), 6.84 (d, *J* = 8.0 Hz, 1 H), 7.03 – 7.07 (m, 3 H), 7.17 – 7.27 (m, 7 H), 7.30 – 7.34 (m, 3 H), 7.69 – 7.73 (m, 3 H). <sup>13</sup>C{H} NMR (100 MHz, CDCl<sub>3</sub>): δ 21.0, 21.5, 82.6, 115.4, 117.5, 121.6, 125.0, 126.7, 126.8, 127.7, 128.0, 128.4, 129.1, 129.9, 131.0, 135.7, 136.9, 137.3, 138.0, 139.7, 142.8, 144.6, 152.6. HRMS (ESI, *m/z*): calcd for C<sub>29</sub>H<sub>25</sub>O<sub>3</sub>S: [M+H]<sup>+</sup> = 453.1519; found: 453.1525.

**2-(4-chlorophenyl)-2-phenyl-4-tosyl-2H-chromene (3h):**

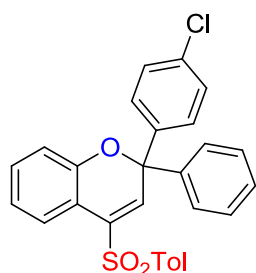

The resultant residue was purified by flash silica gel column chromatography to afford **3h** as a white solid; mp: 154–156 °C. <sup>1</sup>H NMR (400 MHz, CDCl<sub>3</sub>): δ 2.37 (s, 3 H), 6.82 – 6.86 (m, 1 H), 6.91 (d, *J* = 8.4 Hz, 1 H), 7.12 – 7.16 (m, 1 H), 7.25 – 7.39 (m, 12 H), 7.78 – 7.81 (m, 3 H). <sup>13</sup>C{H} NMR (100 MHz, CDCl<sub>3</sub>): δ 21.6, 82.2, 115.4, 117.5, 121.9, 125.2, 126.7, 127.8, 128.3, 128.4, 128.6, 128.7, 129.9, 131.3, 134.2, 136.4, 136.8, 141.2, 142.2, 144.7, 152.3. HRMS (ESI, *m/z*): calcd for C<sub>28</sub>H<sub>22</sub>ClO<sub>3</sub>S: [M+H]<sup>+</sup> = 473.0973; found: 473.0971.

**2-(2-chlorophenyl)-2-phenyl-4-tosyl-2H-chromene (3i):**

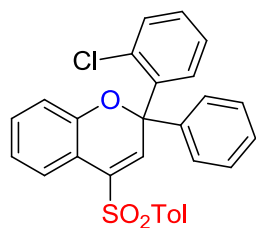

The resultant residue was purified by flash silica gel column chromatography to afford **3i** as a white solid; mp: 60–62 °C.  $^1\text{H}$  NMR (400 MHz,  $\text{CDCl}_3$ ): 2.31 (s, 3 H), 6.78 (t,  $J = 8.0$  Hz, 1 H), 6.87 (d,  $J = 8.0$  Hz, 1 H), 7.06 – 7.10 (m, 1 H), 7.14 – 7.32 (m, 10 H), 7.38 – 7.41 (m, 1 H), 7.52 (s, 1 H), 7.74 – 7.77 (m, 3 H).  $^{13}\text{C}\{\text{H}\}$  NMR (100 MHz,  $\text{CDCl}_3$ ):  $\delta$  21.6, 82.6, 115.3, 117.4, 121.8, 125.1, 126.5, 127.1, 128.0, 128.4, 128.5, 129.5, 129.9, 131.1, 131.8, 132.8, 135.5, 136.2, 136.7, 138.8, 140.9, 144.7, 152.3. HRMS (ESI,  $m/z$ ): calcd for  $\text{C}_{28}\text{H}_{22}\text{ClO}_3\text{S}$ :  $[\text{M}+\text{H}]^+ = 473.0973$ ; found: 473.0973.

**2-(2-methoxyphenyl)-2-phenyl-4-tosyl-2H-chromene (3j):**

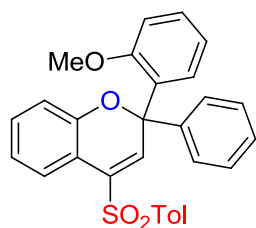

The resultant residue was purified by flash silica gel column chromatography to afford **3j** as a white solid; mp: 174–176 °C.  $^1\text{H}$  NMR (400 MHz,  $\text{CDCl}_3$ ):  $\delta$  2.36 (s, 3 H), 3.65 (s, 3 H), 6.81 (t,  $J = 7.6$  Hz, 1 H), 6.89 – 6.96 (m, 3 H), 7.10 – 7.14 (m, 1 H), 7.24 – 7.36 (m, 8 H), 7.51 (dd,  $J = 1.6, 7.6$  Hz, 1 H), 7.72 – 7.76 (m, 2 H), 7.80 (d,  $J = 7.6$  Hz, 2 H).  $^{13}\text{C}\{\text{H}\}$  NMR (100 MHz,  $\text{CDCl}_3$ ):  $\delta$  21.5,



55.7, 82.0, 112.3, 115.4, 117.4, 120.6, 121.6, 124.9, 126.9, 127.7, 127.8, 128.0, 128.1, 129.7, 129.8, 130.7, 134.3, 137.7, 142.2, 144.4, 152.4, 156.1. HRMS (ESI, m/z): calcd for C<sub>29</sub>H<sub>25</sub>O<sub>4</sub>S: [M+H]<sup>+</sup> = 469.1468; found: 469.1467.

**2-(naphthalen-2-yl)-2-phenyl-4-tosyl-2H-chromene (3k):**

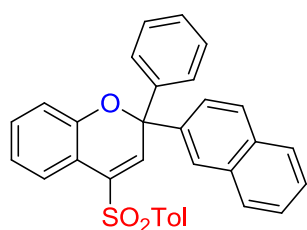

The resultant residue was purified by flash silica gel column chromatography to afford **3k** as a white solid; mp: 203–205 °C. <sup>1</sup>H NMR (400 MHz, CDCl<sub>3</sub>): δ 2.27 (s, 3 H), 6.72 – 6.76 (m, 1 H), 6.87 – 6.89 (m, 1 H), 7.02 – 7.06 (m, 1 H), 7.15 – 7.28 (m, 5 H), 7.34 – 7.42 (m, 6 H), 7.70 – 7.80 (m, 6 H), 7.81 (s, 1 H). <sup>13</sup>C{H} NMR (100 MHz, CDCl<sub>3</sub>): δ 21.5, 82.8, 115.5, 117.6, 121.8, 124.6, 125.1, 126.1, 126.4, 126.6, 126.9, 127.6, 127.8, 128.2, 128.4, 128.5, 129.9, 131.2, 132.7, 132.9, 136.2, 136.9, 137.0, 139.7, 142.6, 144.6, 152.5. HRMS (ESI, m/z): calcd for C<sub>32</sub>H<sub>25</sub>O<sub>3</sub>S: [M+H]<sup>+</sup> = 489.1519; found: 489.1514.

**2-(4-fluorophenyl)-2-(thiophen-2-yl)-4-tosyl-2H-chromene (3l):**

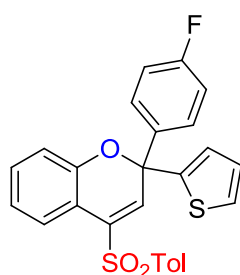

The resultant residue was purified by flash silica gel column chromatography to afford **3l** as a white solid; mp: 164–166 °C. <sup>1</sup>H NMR (400 MHz, CDCl<sub>3</sub>): δ 2.38 (s, 3 H), 6.84 – 6.94 (m, 4 H), 7.05 (t, *J* = 8.8 Hz, 2 H), 7.13 – 7.18 (m, 1 H), 7.28 – 7.34 (m, 4 H), 7.46 – 7.50 (m, 2 H), 7.81 (d, *J* = 8.4 Hz, 3 H). <sup>13</sup>C{H} NMR (100 MHz, CDCl<sub>3</sub>): δ 21.6, 80.2, 115.2, 115.3, 115.5, 117.6, 122.1, 125.1, 126.7, 126.8, 127.1, 127.8, 128.3, 128.4, 129.9, 131.3, 135.6, 136.2, 136.7, 137.9, 139.9, 144.8, 146.4, 152.0, 161.4, 163.8. HRMS (ESI, *m/z*): calcd for C<sub>26</sub>H<sub>20</sub>FO<sub>3</sub>S<sub>2</sub>: [M+H]<sup>+</sup> = 463.0832; found: 463.0834.

**6-methyl-2,2-diphenyl-4-tosyl-2H-chromene (3m):**

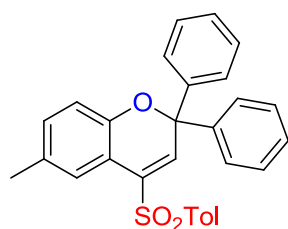

The resultant residue was purified by flash silica gel column chromatography to afford **3m** as a white solid; mp: 219–221 °C. <sup>1</sup>H NMR (400 MHz, CDCl<sub>3</sub>): δ 2.17 (s, 3 H), 2.37 (s, 3 H), 6.82 (d, *J* = 8.4 Hz, 1 H), 6.92 (dd, *J* = 1.2, 8.0 Hz, 1 H), 7.24 – 7.34 (m, 8 H), 7.38 – 7.41 (m, 5 H), 7.59 (s, 1 H), 7.79 (d, *J* = 8.4 Hz, 2 H). <sup>13</sup>C{H} NMR (100 MHz, CDCl<sub>3</sub>): δ 20.8, 21.6, 82.5, 115.1, 117.2, 125.4, 126.8, 127.8, 128.1, 128.4, 129.9, 130.9, 131.7, 136.0, 136.9, 137.1, 142.7, 144.6, 150.3. HRMS (ESI, *m/z*): calcd for C<sub>29</sub>H<sub>25</sub>O<sub>3</sub>S: [M+H]<sup>+</sup> = 453.1519; found: 453.1519.

**6-chloro-2,2-diphenyl-4-tosyl-2H-chromene (3n):**

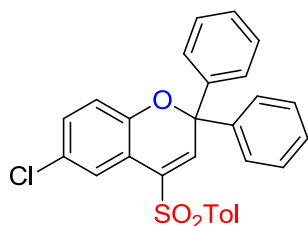

The resultant residue was purified by flash silica gel column chromatography to afford **3n** as a yellow solid; mp: 204–206 °C.  $^1\text{H}$  NMR (400 MHz,  $\text{CDCl}_3$ ):  $\delta$  2.33 (s, 3 H), 6.79 (d,  $J = 8.4$  Hz, 1 H), 7.01 (dd,  $J = 2.4, 8.8$  Hz, 1 H), 7.23 – 7.30 (m, 12 H), 7.38 (s, 1 H), 7.70 – 7.74 (m, 3 H).  $^{13}\text{C}\{\text{H}\}$  NMR (100 MHz,  $\text{CDCl}_3$ ):  $\delta$  21.6, 83.1, 116.7, 118.8, 124.9, 126.8, 126.8, 127.8, 128.4, 128.5, 130.1, 130.9, 135.3, 136.5, 138.1, 142.1, 144.9, 151.1. HRMS (ESI,  $m/z$ ): calcd for  $\text{C}_{28}\text{H}_{22}\text{ClO}_3\text{S}$ :  $[\text{M}+\text{H}]^+ = 473.0973$ ; found: 473.0968.

**6-bromo-2,2-diphenyl-4-tosyl-2H-chromene (3o):**

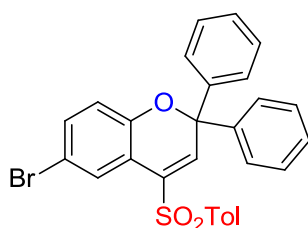

The resultant residue was purified by flash silica gel column chromatography to afford **3o** as a yellow solid; mp: 207–209 °C.  $^1\text{H}$  NMR (400 MHz,  $\text{CDCl}_3$ ):  $\delta$  2.25 (s, 3 H), 6.66 (d,  $J = 8.8$  Hz, 1 H), 7.06 – 7.09 (m, 1 H), 7.10 – 7.22 (m, 12 H), 7.30 (s, 1 H), 7.64 (d,  $J = 8.4$  Hz, 2 H), 7.81 (d,  $J = 2.0$  Hz, 1 H).  $^{13}\text{C}\{\text{H}\}$  NMR (100 MHz,  $\text{CDCl}_3$ ):  $\delta$  21.6, 83.0, 114.0, 117.2, 119.3, 126.8, 127.8, 127.9,

128.4, 128.5, 130.0, 133.8, 135.2, 136.5, 138.0, 142.1, 144.9, 151.6. HRMS

(ESI, m/z): calcd for  $C_{21}H_{16}N_5O_2$ :  $M+H = 370.1299$ ; found: 370.1301. HRMS

(ESI, m/z): calcd for  $C_{28}H_{22}BrO_3S$ :  $[M+H]^+ = 517.0468$ ; found: 517.0471.

### 2-(3-phenyl-3-tosylbut-1-yn-1-yl)phenol (**3p'**):

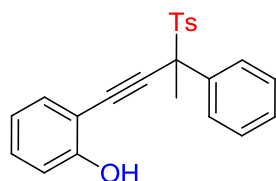

The resultant residue was purified by flash silica gel column chromatography to afford **3p'** as a yellow liquid.  $^1H$  NMR (400 MHz,  $CDCl_3$ ):  $\delta$  2.23 (s, 3 H), 2.35 (s, 3 H), 6.88 (t,  $J = 7.6$  Hz, 1 H), 6.90 – 7.03 (m, 1 H), 7.10 (d,  $J = 8.0$  Hz, 2 H), 7.27 – 7.37 (m, 8 H), 7.53 (d,  $J = 7.6$  Hz, 2 H).  $^{13}C\{H\}$  NMR (100 MHz,  $CDCl_3$ ):  $\delta$  21.6, 22.2, 68.5, 85.0, 93.3, 108.1, 115.4, 120.1, 128.2, 128.7, 128.9, 129.2, 130.6, 131.1, 131.4, 133.9, 145.1, 158.4. HRMS (ESI, m/z): calcd for  $C_{23}H_{21}O_3S$ :  $[M+H]^+ = 377.1206$ ; found: 377.1208.

### 2-(3-methyl-3-tosylbut-1-yn-1-yl)phenol (**3q'**):

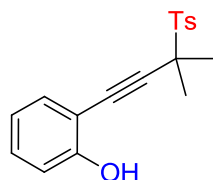

The resultant residue was purified by flash silica gel column chromatography to afford **3q'** as a yellow liquid.  $^1H$  NMR (400 MHz,  $CDCl_3$ ):  $\delta$  1.62 (s, 6 H),

2.38 (s, 3 H), 6.04 (s, 1 H), 6.78 (t,  $J = 7.6$  Hz, 1 H), 6.89 (d,  $J = 8.4$  Hz, 1 H), 7.14 – 7.16 (m, 1 H), 7.18 – 7.22 (m, 1 H), 7.27 (d,  $J = 8.0$  Hz, 2 H), 7.78 (d,  $J = 8.0$  Hz, 2 H).  $^{13}\text{C}\{\text{H}\}$  NMR (100 MHz,  $\text{CDCl}_3$ ):  $\delta$  21.7, 23.5, 59.9, 81.5, 94.5, 108.1, 115.2, 120.2, 129.5, 130.7, 130.9, 131.3, 131.7, 145.4, 157.7. HRMS (ESI,  $m/z$ ): calcd for  $\text{C}_{18}\text{H}_{18}\text{O}_3\text{S}$ :  $[\text{M}+\text{H}]^+ = 315.1049$ ; found: 315.1047.

**2-(4-methoxyphenyl)-4-tosyl-2H-chromene (5a):**

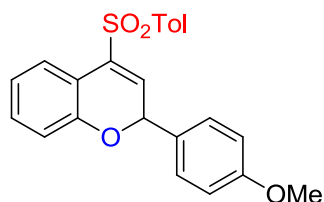

The resultant residue was purified by flash silica gel column chromatography to afford **5a** as a yellow solid; mp: 54–56 °C.  $^1\text{H}$  NMR (400 MHz,  $\text{CDCl}_3$ ):  $\delta$  2.39 (s, 3 H), 3.81 (s, 3 H), 5.47 (s, 1 H), 6.86 (d,  $J = 8.8$  Hz, 2 H), 6.97 (s, 1 H), 7.17 – 7.29 (m, 4 H), 7.40 – 7.45 (m, 3 H), 7.50 – 7.56 (m, 3 H).  $^{13}\text{C}\{\text{H}\}$  NMR (100 MHz,  $\text{CDCl}_3$ ):  $\delta$  21.6, 55.3, 70.6, 108.3, 111.3, 114.0, 121.3, 122.3, 123.0, 124.7, 127.9, 129.3, 129.3, 131.7, 134.6, 144.8, 149.1, 154.9, 160.3. HRMS (ESI,  $m/z$ ): calcd for  $\text{C}_{23}\text{H}_{21}\text{O}_4\text{S}$ :  $[\text{M}+\text{H}]^+ = 393.1155$ ; found: 393.1162.

**2-(3,4-dimethylphenyl)-4-tosyl-2H-chromene (5b):**

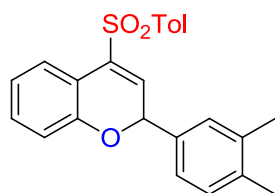



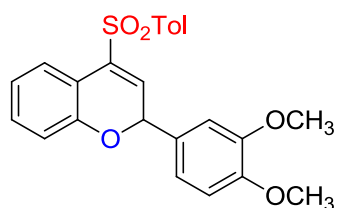

The resultant residue was purified by flash silica gel column chromatography to afford **5d** as a yellow solid; mp: 56–58 °C.  $^1\text{H}$  NMR (400 MHz,  $\text{CDCl}_3$ ):  $\delta$  2.38 (s, 3 H), 3.82 (s, 3 H), 3.86 (s, 3 H), 5.47 (s, 1 H), 6.80 (d,  $J = 8.4$  Hz, 1 H), 6.98 (s, 1 H), 7.03 – 7.06 (m, 2 H), 7.17 – 7.30 (m, 4 H), 7.41 (d,  $J = 8.0$  Hz, 1 H), 7.51 – 7.56 (m, 3 H).  $^{13}\text{C}\{\text{H}\}$  NMR (100 MHz,  $\text{CDCl}_3$ ):  $\delta$  21.5, 55.8, 70.8, 108.3, 110.9, 111.2, 113.3, 121.3, 122.6, 123.0, 123.2, 124.8, 127.8, 129.2, 129.3, 134.5, 144.8, 148.7, 148.9, 149.7, 154.9. HRMS (ESI,  $m/z$ ): calcd for  $\text{C}_{24}\text{H}_{23}\text{O}_5\text{S}$ :  $[\text{M}+\text{H}]^+ = 423.1261$ ; found: 423.1263.

**4-tosyl-2-(3,4,5-trimethoxyphenyl)-2H-chromene (5e):**

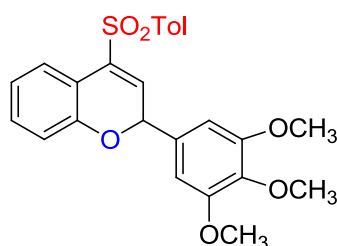

The resultant residue was purified by flash silica gel column chromatography to afford **5e** as a yellow solid; mp: 167–169 °C.  $^1\text{H}$  NMR (400 MHz,  $\text{CDCl}_3$ ):  $\delta$  2.39 (s, 3 H), 3.79 (s, 6 H), 3.84 (s, 3 H), 5.44 (s, 1 H), 6.71 (s, 2 H), 7.00 (s, 1 H), 7.19 – 7.31 (m, 4 H), 7.41 (d,  $J = 8.4$  Hz, 1 H), 7.53 – 7.57 (m, 3 H).  $^{13}\text{C}\{\text{H}\}$  NMR (100 MHz,  $\text{CDCl}_3$ ):  $\delta$  21.5, 56.1, 60.8, 71.2, 107.7, 108.4, 111.2, 121.3, 123.1, 124.9, 125.7, 127.7, 129.3, 134.5, 138.8, 144.9, 148.7, 153.1, 154.9.

HRMS (ESI, m/z): calcd for C<sub>25</sub>H<sub>25</sub>O<sub>6</sub>S: [M+H]<sup>+</sup> = 453.1366; found: 453.1361.

**2-(naphthalen-2-yl)-4-tosyl-2H-chromene (5f):**

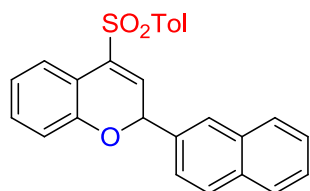

The resultant residue was purified by flash silica gel column chromatography to afford **5f** as a yellow solid; mp: 163–165 °C. <sup>1</sup>H NMR (400 MHz, CDCl<sub>3</sub>): δ 2.26 (s, 3 H), 5.62 (s, 1 H), 6.98 (s, 1 H), 7.05 (d, *J* = 8.4 Hz, 2 H), 7.12 – 7.22 (m, 2 H), 7.34 – 7.49 (m, 6 H), 7.56 – 7.59 (m, 1 H), 7.69 – 7.74 (m, 3 H), 7.88 (s, 1 H). <sup>13</sup>C{H} NMR (100 MHz, CDCl<sub>3</sub>): δ 21.6, 71.4, 108.5, 111.3, 121.3, 123.1, 124.8, 126.4, 126.8, 127.2, 127.6, 127.8, 127.9, 128.2, 128.3, 129.3, 129.4, 130.4, 132.9, 133.3, 134.6, 144.9, 148.9, 155.0. HRMS (ESI, m/z): calcd for C<sub>26</sub>H<sub>21</sub>O<sub>3</sub>S: [M+H]<sup>+</sup> = 413.1206; found: 413.1208.

**2-(3-(4-fluorophenyl)-3-tosylprop-1-yn-1-yl)phenol (5g')**

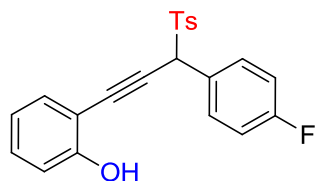

The resultant residue was purified by flash silica gel column chromatography to afford **5g'** as a yellow solid; mp: 131–133 °C. <sup>1</sup>H NMR (400 MHz, CDCl<sub>3</sub>): δ 2.41 (s, 3 H), 5.34 (s, 1 H), 6.87 (t, *J* = 7.6 Hz, 1 H), 6.97 – 7.04 (m, 3 H), 7.23



– 7.29 (m, 4 H), 7.31 – 7.37 (m, 2 H), 7.53 (d,  $J = 8.0$  Hz, 2 H).  $^{13}\text{C}\{\text{H}\}$  NMR (100 MHz,  $\text{CDCl}_3$ ):  $\delta$  21.6, 65.3, 84.9, 87.6, 107.8, 115.4, 115.5, 115.7, 120.2, 125.6, 125.6, 129.5, 129.8, 131.3, 131.4, 131.7, 131.7, 132.3, 145.7, 158.1, 162.2, 164.7. HRMS (ESI,  $m/z$ ): calcd for  $\text{C}_{22}\text{H}_{18}\text{FO}_3\text{S}$ :  $[\text{M}+\text{H}]^+ = 381.0955$ ; found: 381.0952.

**2-(3-(4-chlorophenyl)-3-tosylprop-1-yn-1-yl)phenol (5h')**:

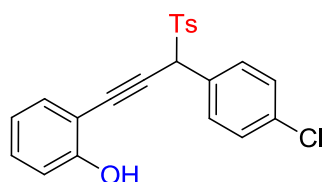

The resultant residue was purified by flash silica gel column chromatography to afford **5h'** as a white solid; mp: 126–128 °C.  $^1\text{H}$  NMR (400 MHz,  $\text{CDCl}_3$ ):  $\delta$  2.35 (s, 3 H), 5.25 (s, 1 H), 6.21 (s, 1H), 6.79 (t,  $J = 7.6$  Hz, 1 H), 6.91 (d,  $J = 8.4$  Hz, 1 H), 7.17 – 7.23 (m, 8 H), 7.47 (d,  $J = 8.4$  Hz, 2 H).  $^{13}\text{C}\{\text{H}\}$  NMR (100 MHz,  $\text{CDCl}_3$ ):  $\delta$  21.7, 65.4, 85.0, 87.4, 107.8, 115.4, 120.2, 128.3, 128.8, 129.5, 129.8, 131.2, 131.3, 131.4, 132.3, 135.8, 145.7, 158.1. HRMS (ESI,  $m/z$ ): calcd for  $\text{C}_{22}\text{H}_{18}\text{ClO}_3\text{S}$ :  $[\text{M}+\text{H}]^+ = 397.0660$ ; found: 397.0666.

**2,2-diphenyl-4-(phenylsulfonyl)-2H-chromene (3aa):**

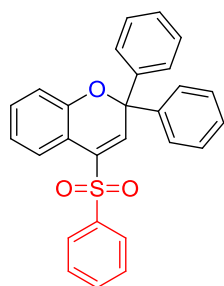

The resultant residue was purified by flash silica gel column chromatography to afford **3aa** as a yellow solid; mp: 171–173 °C.  $^1\text{H}$  NMR (400 MHz,  $\text{CDCl}_3$ ):  $\delta$  6.80 – 6.84 (m, 1 H), 6.93 (d,  $J = 8.0$  Hz, 1 H), 7.11 – 7.16 (m, 1 H), 7.27 – 7.50 (m, 13 H), 7.54 – 7.58 (m, 1 H), 7.77 (dd,  $J = 1.2, 9.2$  Hz, 1 H), 7.90 – 7.93 (m, 2 H).  $^{13}\text{C}\{\text{H}\}$  NMR (100 MHz,  $\text{CDCl}_3$ ):  $\delta$  82.7, 115.3, 117.5, 121.7, 125.0, 126.8, 127.6, 128.2, 128.5, 129.3, 131.2, 133.6, 135.7, 137.5, 139.9, 142.6, 152.5. HRMS (ESI,  $m/z$ ): calcd for  $\text{C}_{27}\text{H}_{21}\text{O}_3\text{S}$ :  $[\text{M}+\text{H}]^+ = 425.1206$ ; found: 425.1201.

#### 4-((4-chlorophenyl)sulfonyl)-2,2-diphenyl-2H-chromene (**3ab**):

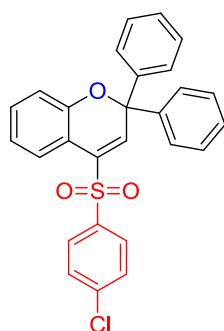

The resultant residue was purified by flash silica gel column chromatography to afford **3ab** as a yellow solid; mp: 195–197 °C.  $^1\text{H}$  NMR (400 MHz,  $\text{CDCl}_3$ ):  $\delta$  6.82 – 6.86 (m, 1 H), 6.95 (d,  $J = 8.0$  Hz, 1 H), 7.14 – 7.18 (m, 1 H), 7.28 – 7.38 (m, 10 H), 7.40 – 7.47 (m, 3 H), 7.75 (dd,  $J = 1.2, 8.0$  Hz, 1 H), 7.84 (d,  $J = 8.8$  Hz, 2 H).  $^{13}\text{C}\{\text{H}\}$  NMR (100 MHz,  $\text{CDCl}_3$ ):  $\delta$  82.7, 115.1, 117.7, 121.8, 124.8,

126.8, 128.3, 128.5, 129.2, 129.6, 131.4, 135.5, 137.9, 138.4, 140.4, 142.5, 152.5. HRMS (ESI, m/z): calcd for C<sub>27</sub>H<sub>20</sub>ClO<sub>3</sub>S: [M+H]<sup>+</sup> = 459.0816; found: 459.0818.

**4-((4-fluorophenyl)sulfonyl)-2,2-diphenyl-2H-chromene (3ac):**

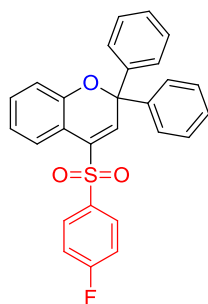

The resultant residue was purified by flash silica gel column chromatography to afford **3ac** as a white solid; mp: 166–168 °C. <sup>1</sup>H NMR (400 MHz, CDCl<sub>3</sub>): δ 6.82 – 6.86 (m, 1 H), 6.94 – 6.96 (m, 1 H), 7.15 (t, *J* = 8.0 Hz, 3 H), 7.27 – 7.41 (m, 10 H), 7.44 (s, 1 H), 7.77 (dd, *J* = 0.8, 8.0 Hz, 1 H), 7.91 – 7.94 (m, 2 H). <sup>13</sup>C{H} NMR (100 MHz, CDCl<sub>3</sub>): δ 82.7, 115.1, 116.5, 116.8, 117.7, 121.8, 124.9, 126.8, 128.2, 128.5, 130.5, 130.6, 131.4, 135.6, 135.9, 137.7, 142.5, 152.6, 164.4, 166.9. HRMS (ESI, m/z): calcd for C<sub>27</sub>H<sub>20</sub>FO<sub>3</sub>S: [M+H]<sup>+</sup> = 443.1112; found: 443.1113.

**4-(methylsulfonyl)-2,2-diphenyl-2H-chromene (3ad):**

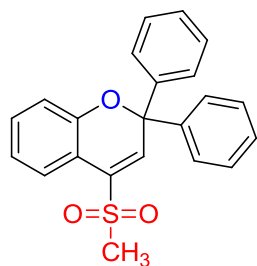

The resultant residue was purified by flash silica gel column chromatography to afford **3ad** as a white solid; mp: 188–190 °C.  $^1\text{H}$  NMR (400 MHz,  $\text{CDCl}_3$ ):  $\delta$  3.05 (s, 3 H), 6.96 (t,  $J = 7.6$  Hz, 1 H), 7.05 (d,  $J = 8.4$  Hz, 1 H), 7.24 – 7.35 (m, 8 H), 7.39 – 7.41 (m, 4 H), 7.87 (d,  $J = 7.6$  Hz, 1 H).  $^{13}\text{C}\{\text{H}\}$  NMR (100 MHz,  $\text{CDCl}_3$ ):  $\delta$  42.5, 82.5, 115.5, 117.9, 122.2, 124.5, 126.7, 128.2, 128.5, 131.5, 135.5, 137.3, 142.4, 152.6. HRMS (ESI,  $m/z$ ): calcd for  $\text{C}_{22}\text{H}_{19}\text{O}_3\text{S}$ :  $[\text{M}+\text{H}]^+ = 363.1049$ ; found: 363.1047.

## Crystal preparation and X-ray diffraction analysis of compound 3a

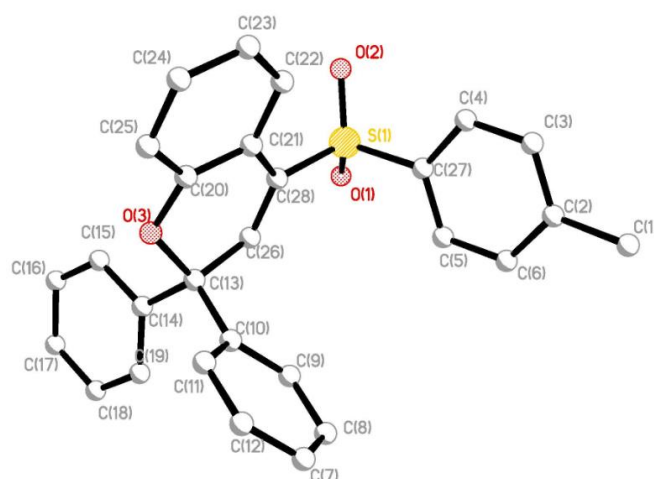

X-ray structure of 3a

### Datablock: 1

---

|                        |                |                    |              |
|------------------------|----------------|--------------------|--------------|
| Bond precision:        | C-C = 0.0029 Å | Wavelength=0.71073 |              |
| Cell:                  | a=10.465 (2)   | b=9.797 (2)        | c=22.032 (5) |
|                        | alpha=90       | beta=95.834 (3)    | gamma=90     |
| Temperature:           | 296 K          |                    |              |
|                        | Calculated     | Reported           |              |
| Volume                 | 2247.1 (8)     | 2247.2 (8)         |              |
| Space group            | P 21/c         | P 21/c             |              |
| Hall group             | -P 2ybc        | -P 2ybc            |              |
| Moiety formula         | C28 H22 O3 S   | ?                  |              |
| Sum formula            | C28 H22 O3 S   | C28 H22 O3 S       |              |
| Mr                     | 438.52         | 438.51             |              |
| Dx, g cm <sup>-3</sup> | 1.296          | 1.296              |              |
| Z                      | 4              | 4                  |              |
| Mu (mm <sup>-1</sup> ) | 0.172          | 0.172              |              |
| F000                   | 920.0          | 920.0              |              |
| F000'                  | 920.89         |                    |              |
| h, k, lmax             | 13, 12, 28     | 13, 12, 28         |              |
| Nref                   | 5206           | 4989               |              |
| Tmin, Tmax             | 0.950, 0.963   |                    |              |
| Tmin'                  | 0.950          |                    |              |

Correction method= Not given

Data completeness= 0.958                      Theta(max)= 27.577

R(reflections)= 0.0448( 4168)              wR2(reflections)= 0.1194( 4989)

S = 1.093                                          Npar= 290

---

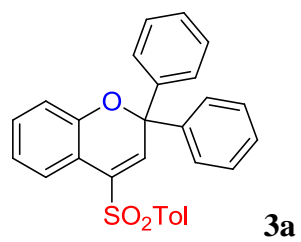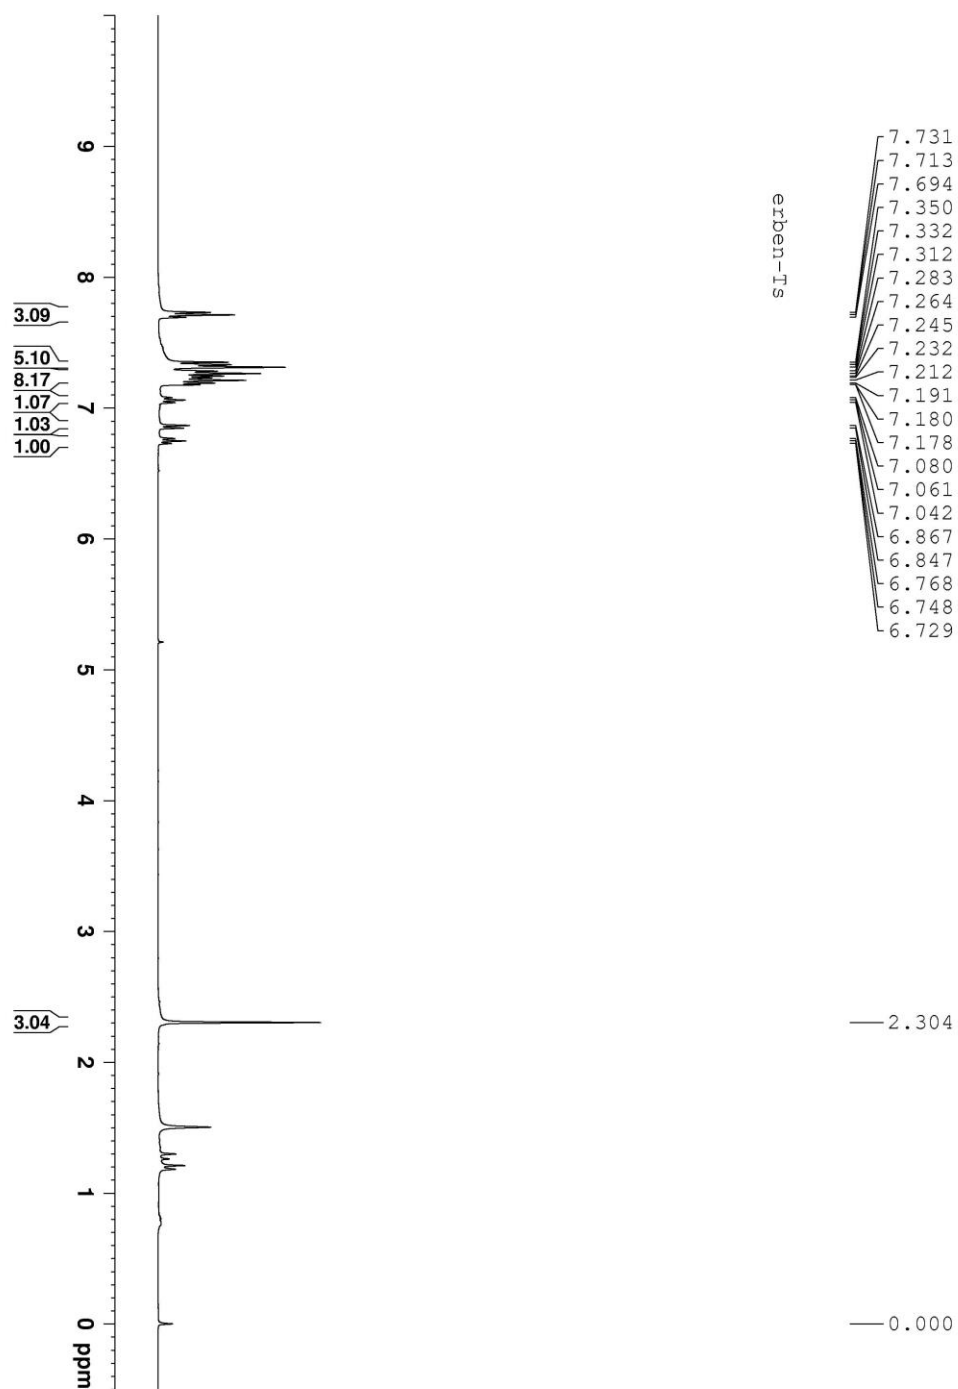

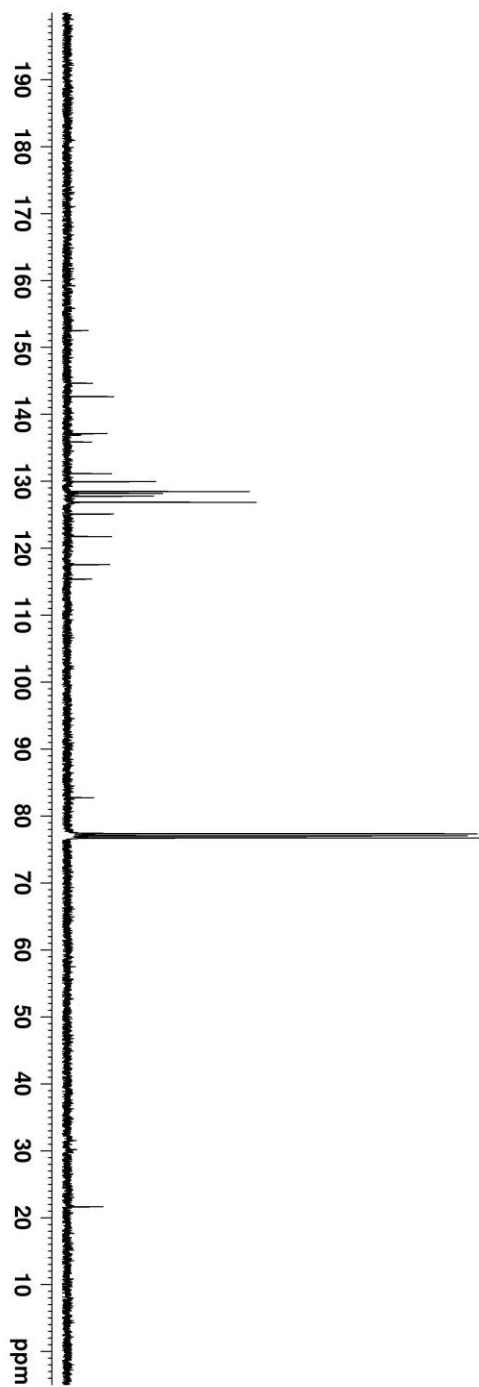

erden-Ts

152.50  
144.64  
142.63  
137.10  
136.88  
135.84  
131.11  
129.92  
128.45  
128.17  
127.76  
126.84  
125.07  
121.71  
117.52  
115.35

82.69  
77.32  
77.00  
76.68

21.58

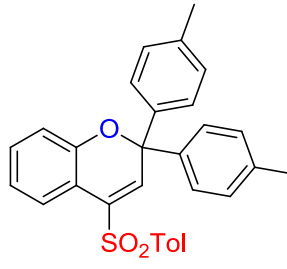

**3b**

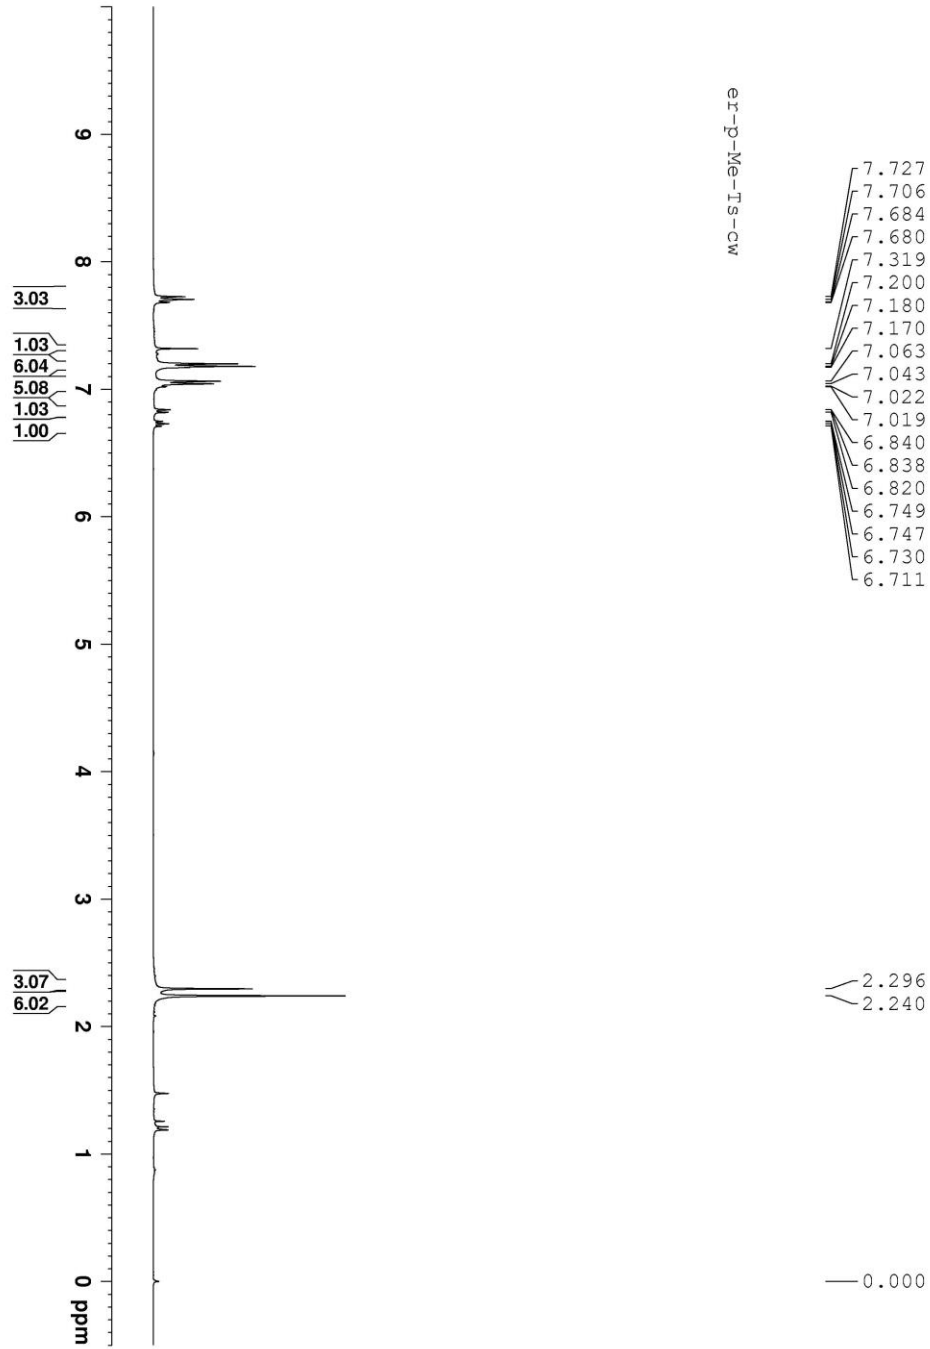



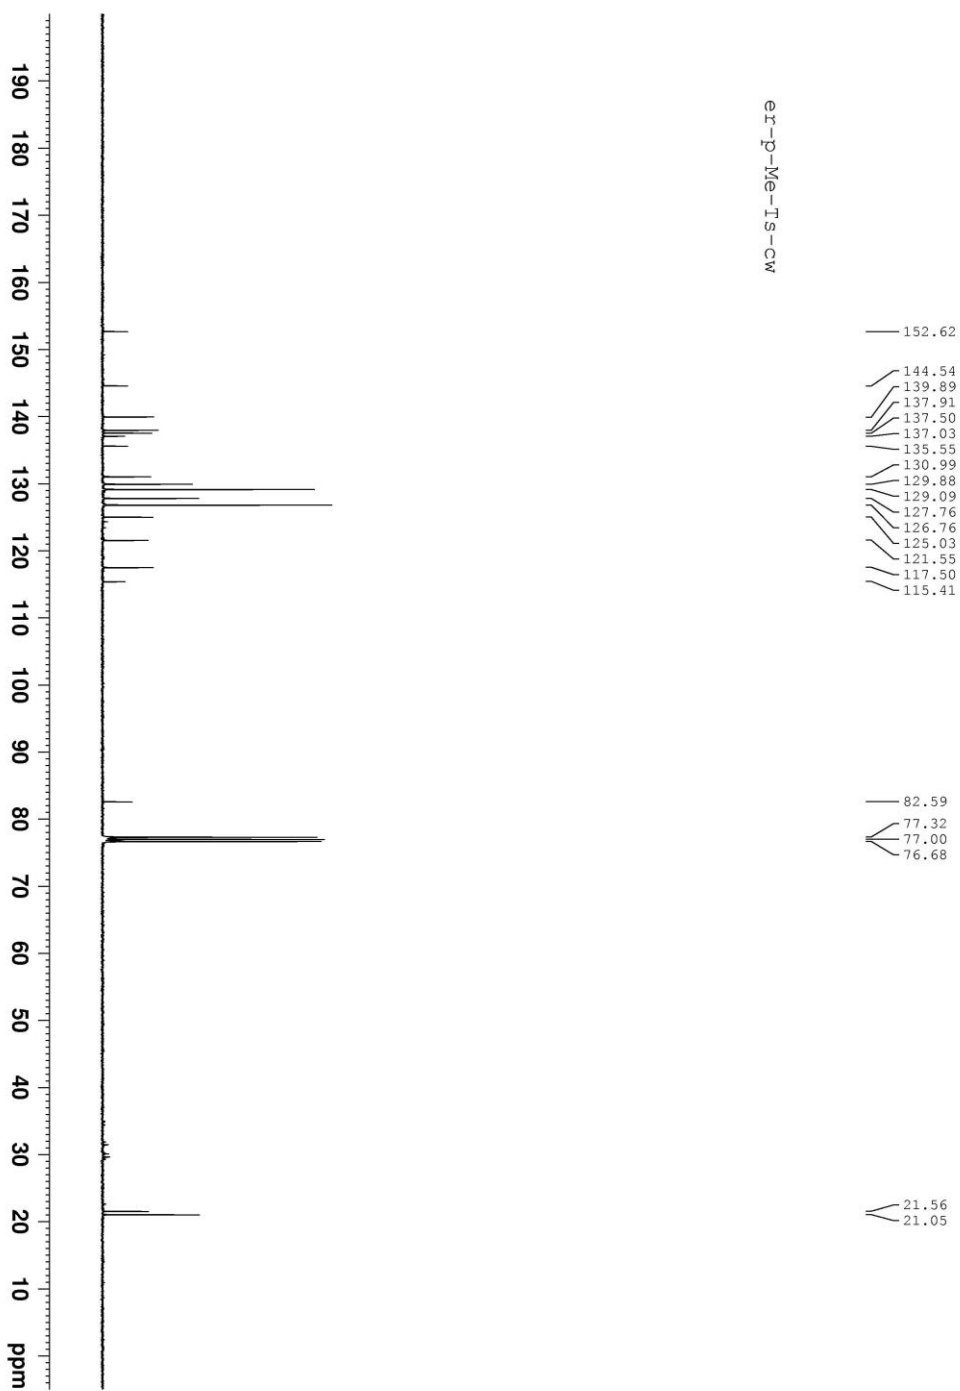

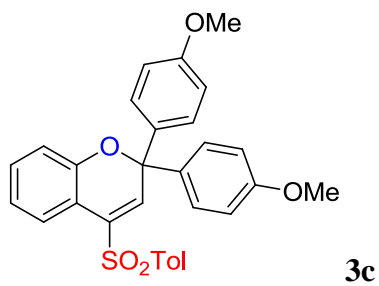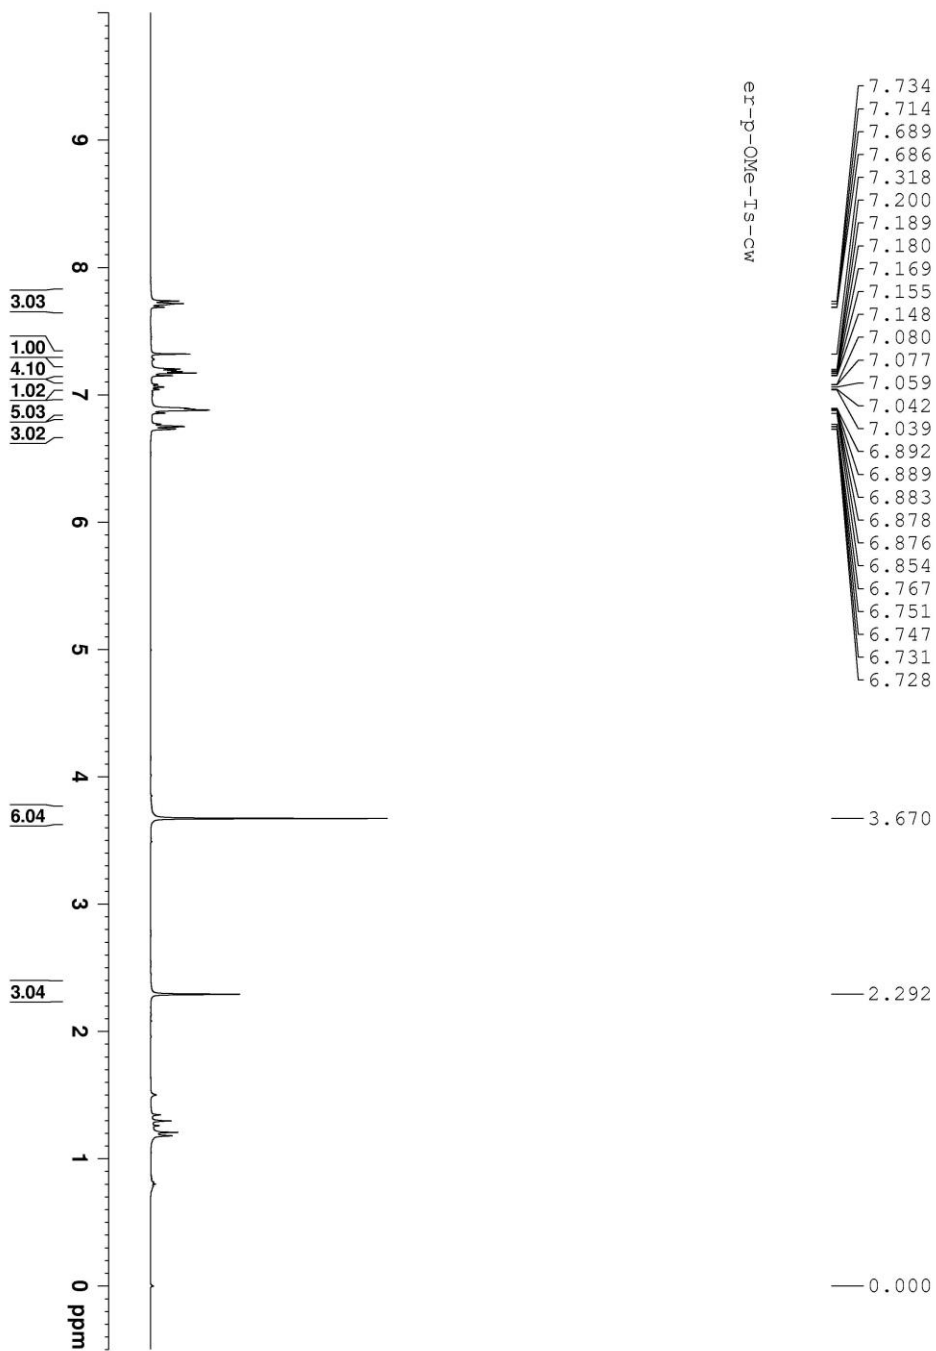

er-P-OMe-Ts

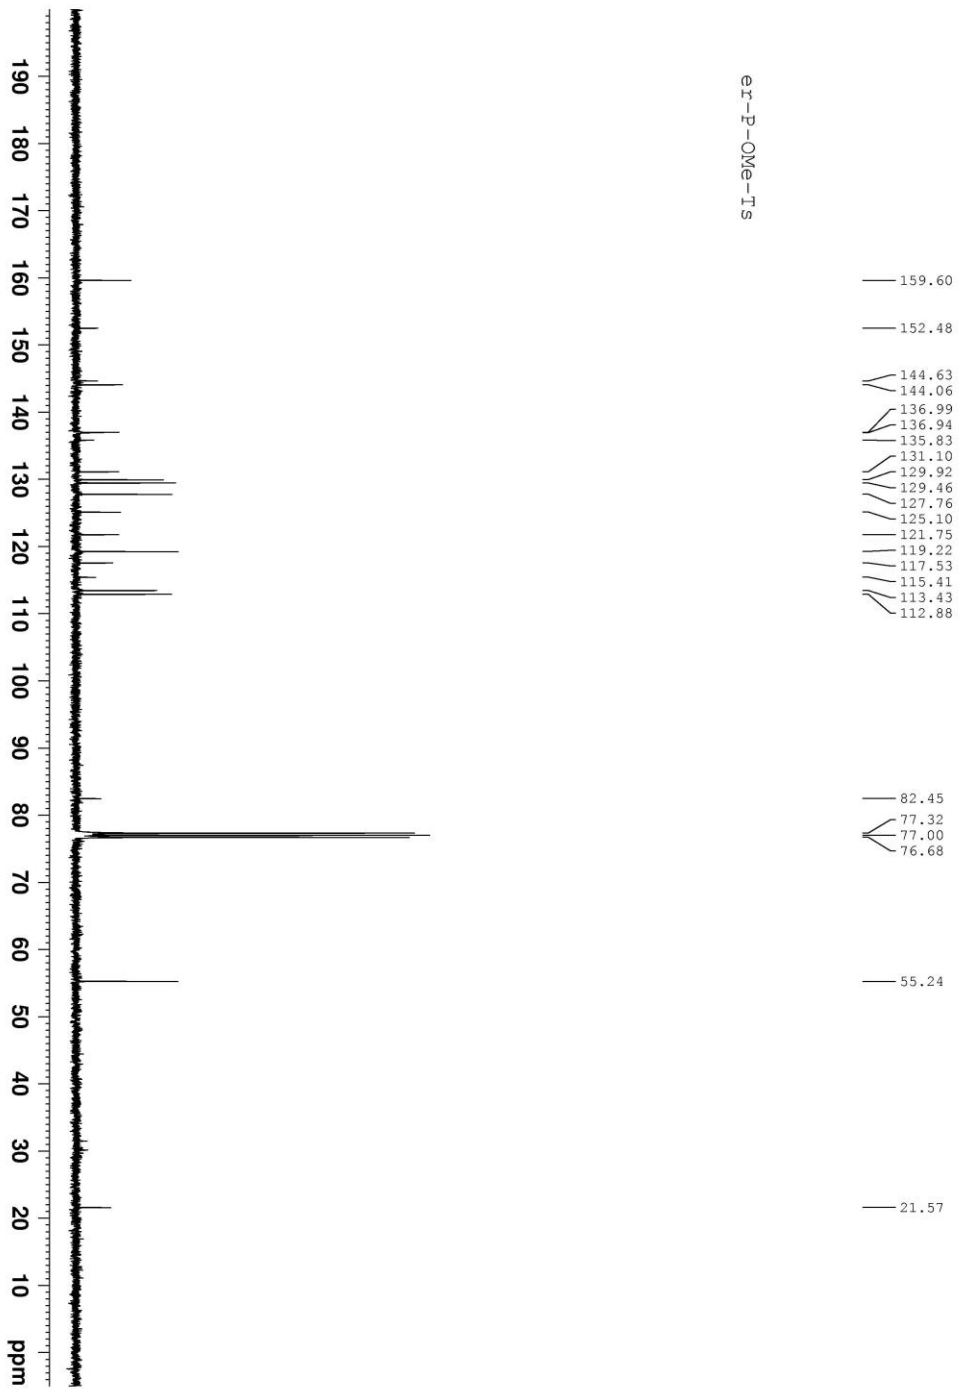

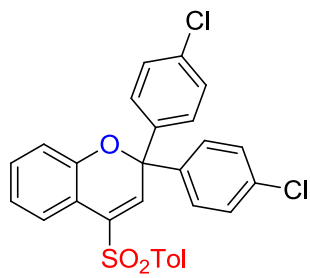

**3d**

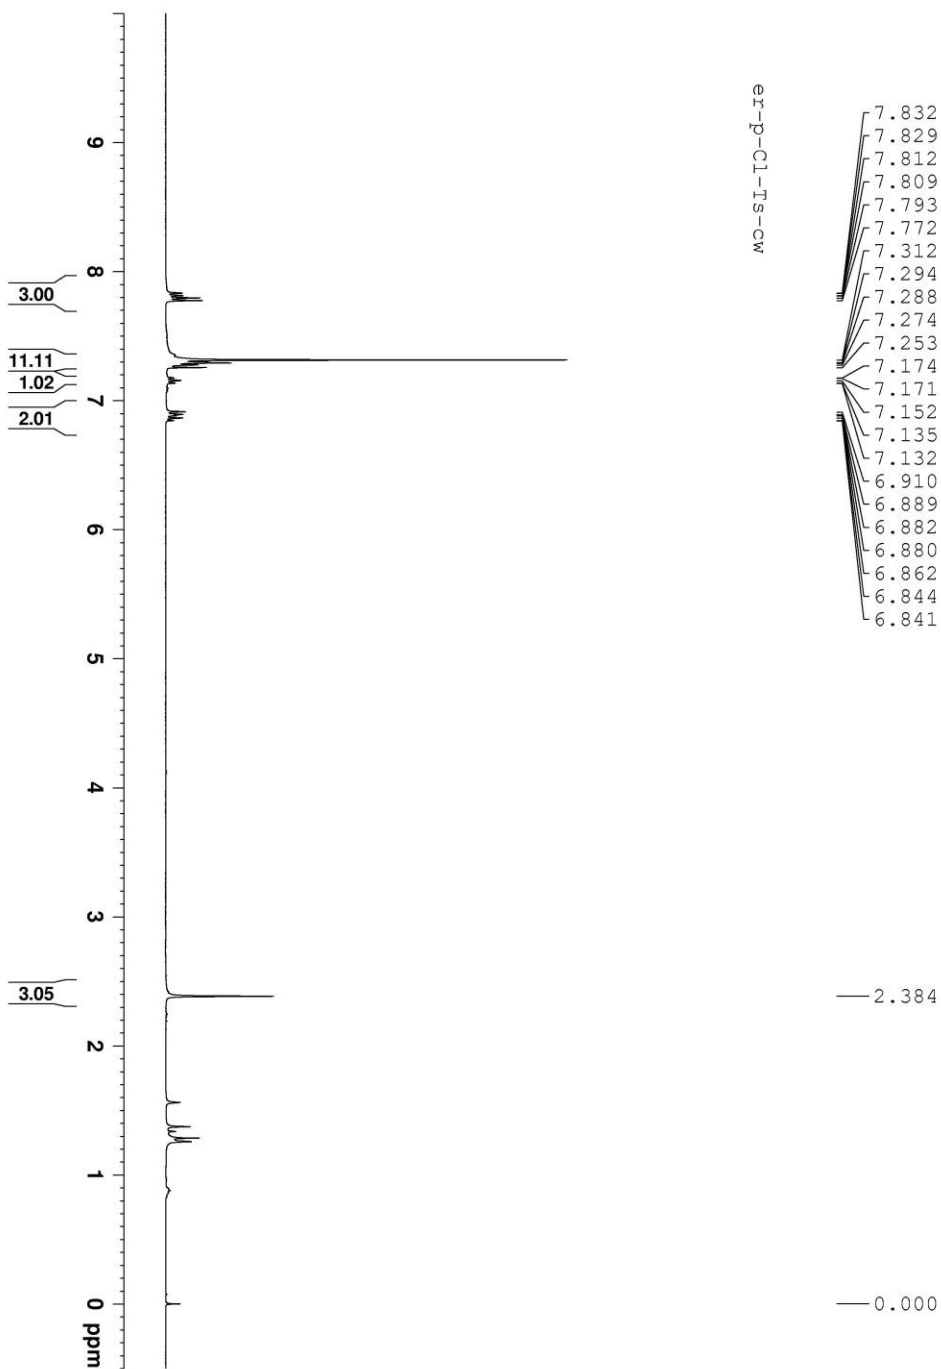

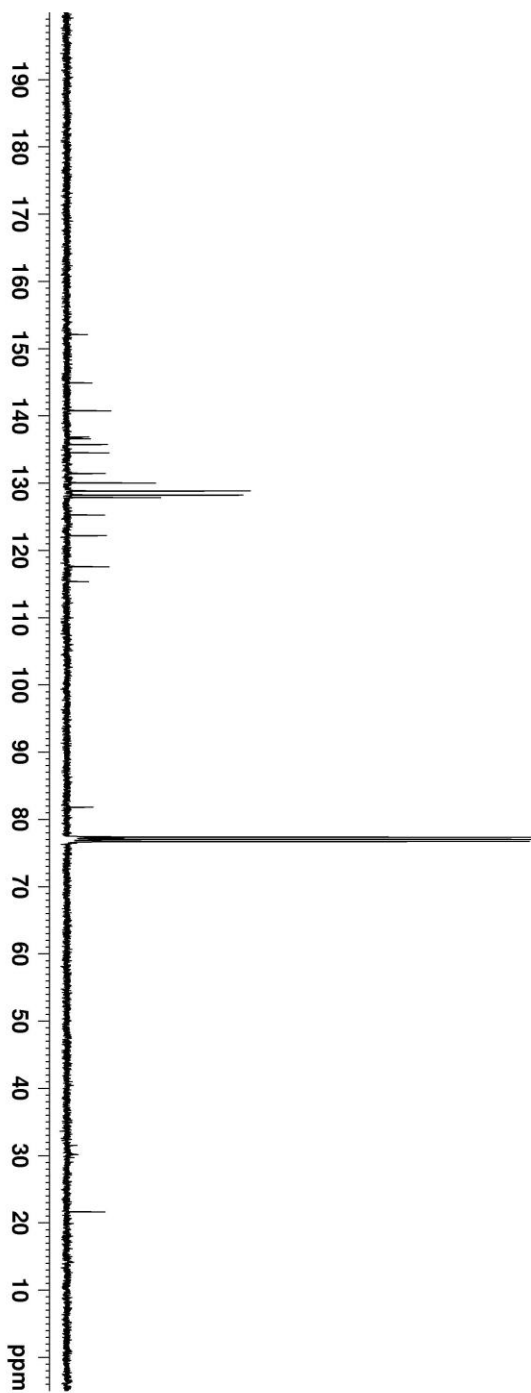

er-p-Cl-erben-1s

152.06  
 144.88  
 140.73  
 136.83  
 136.58  
 135.71  
 134.46  
 131.42  
 130.00  
 128.80  
 128.19  
 127.82  
 125.23  
 122.16  
 117.54  
 115.34

81.77  
 77.32  
 77.00  
 76.68

21.60

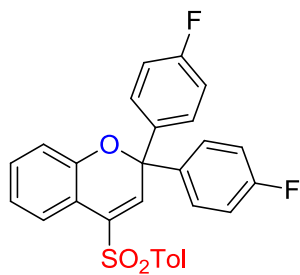

**3e**

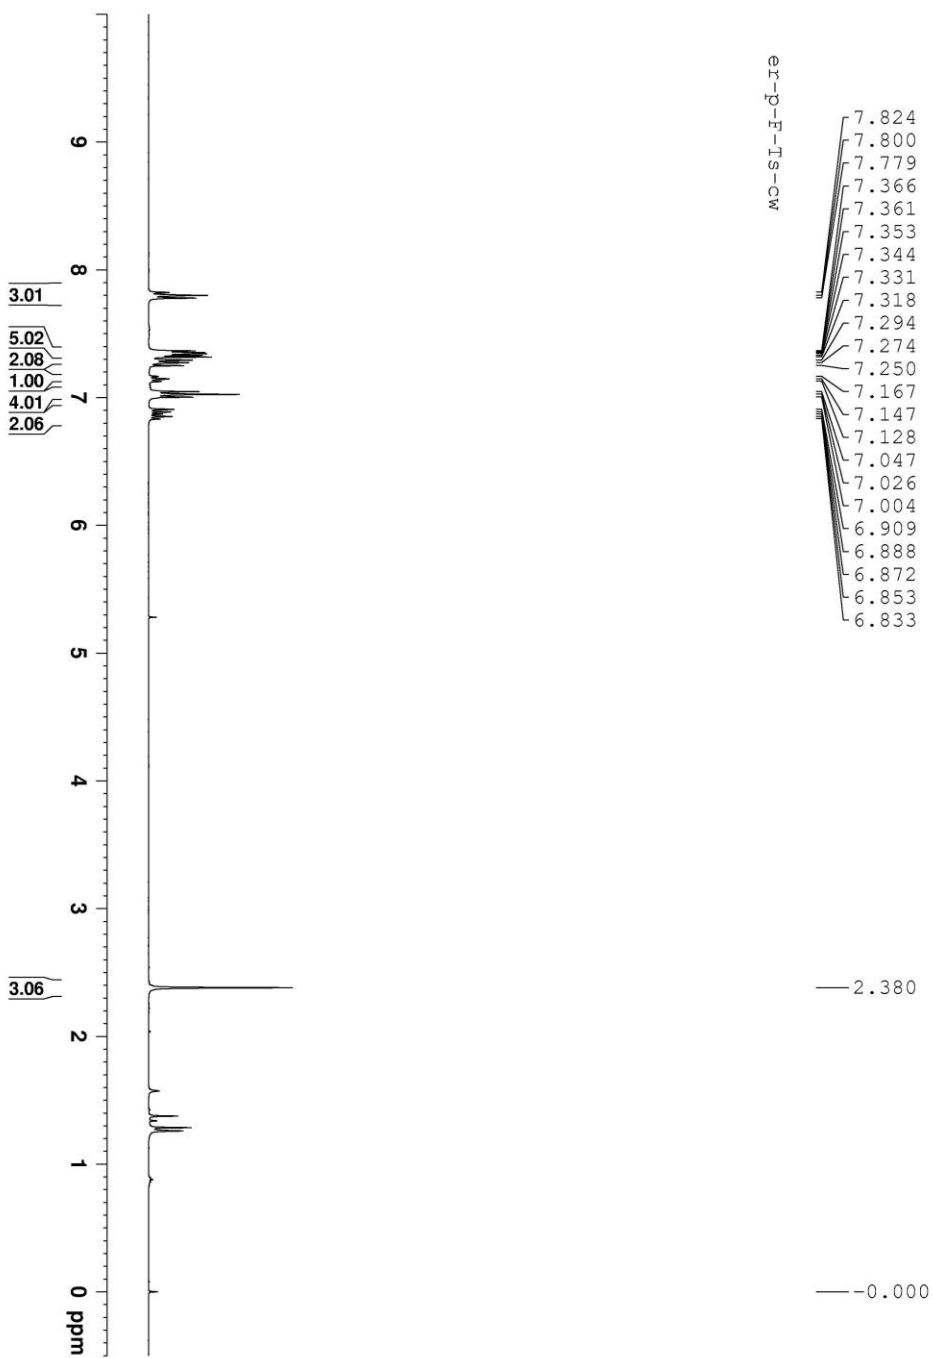

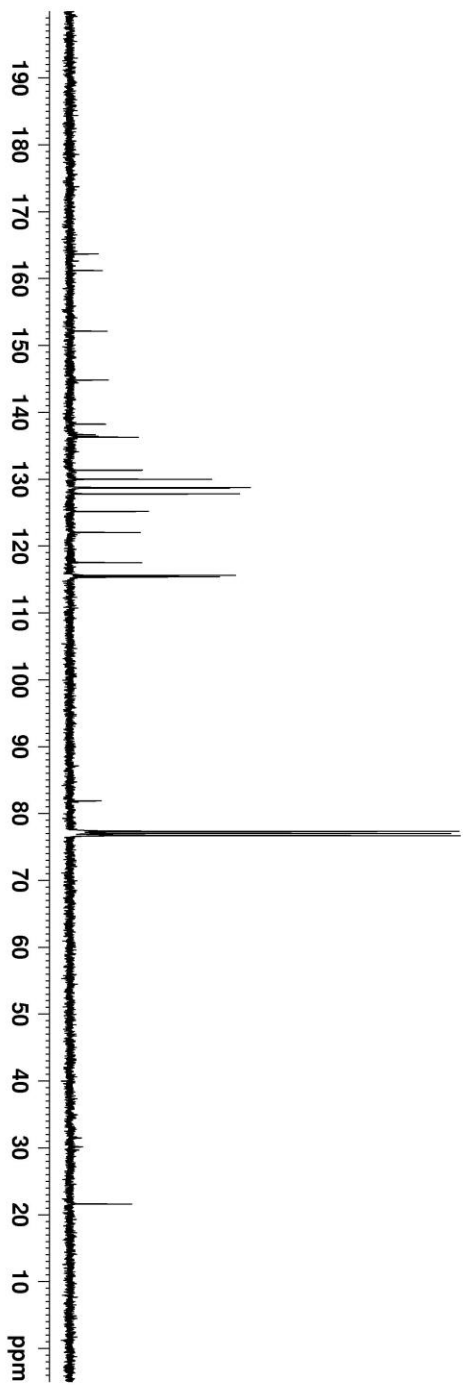

PEAKS

- 163.68
- 161.21
- 152.14
- 144.82
- 138.27
- 138.23
- 136.66
- 136.40
- 136.27
- 131.33
- 129.97
- 128.74
- 128.66
- 127.78
- 125.16
- 122.01
- 117.51
- 115.60
- 115.39
- 115.29
- 81.87
- 77.31
- 77.00
- 76.68
- 21.58

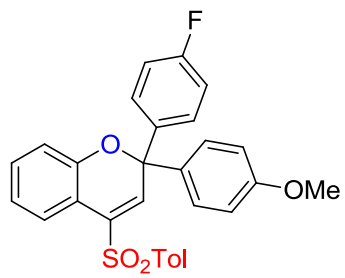

**3f**

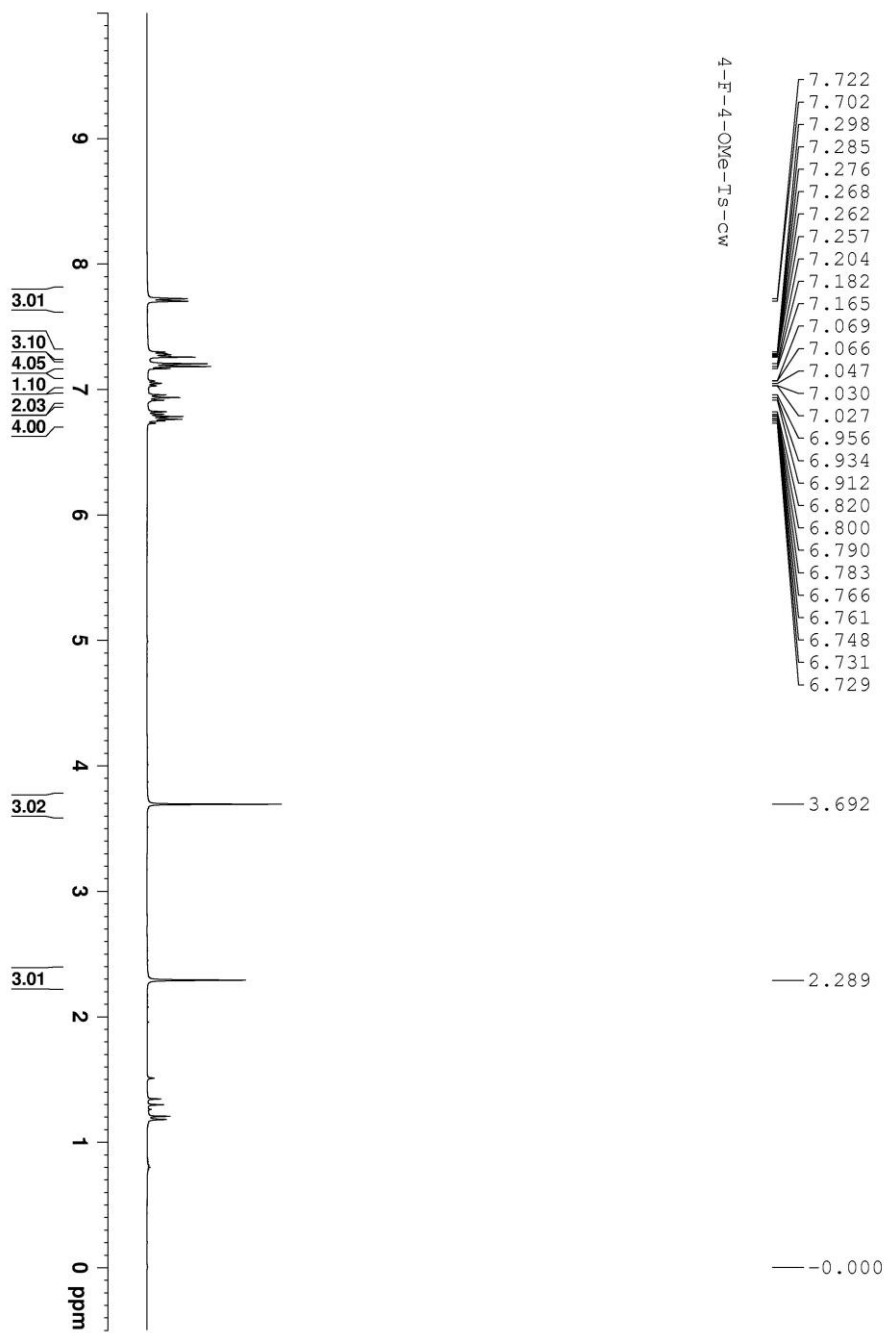



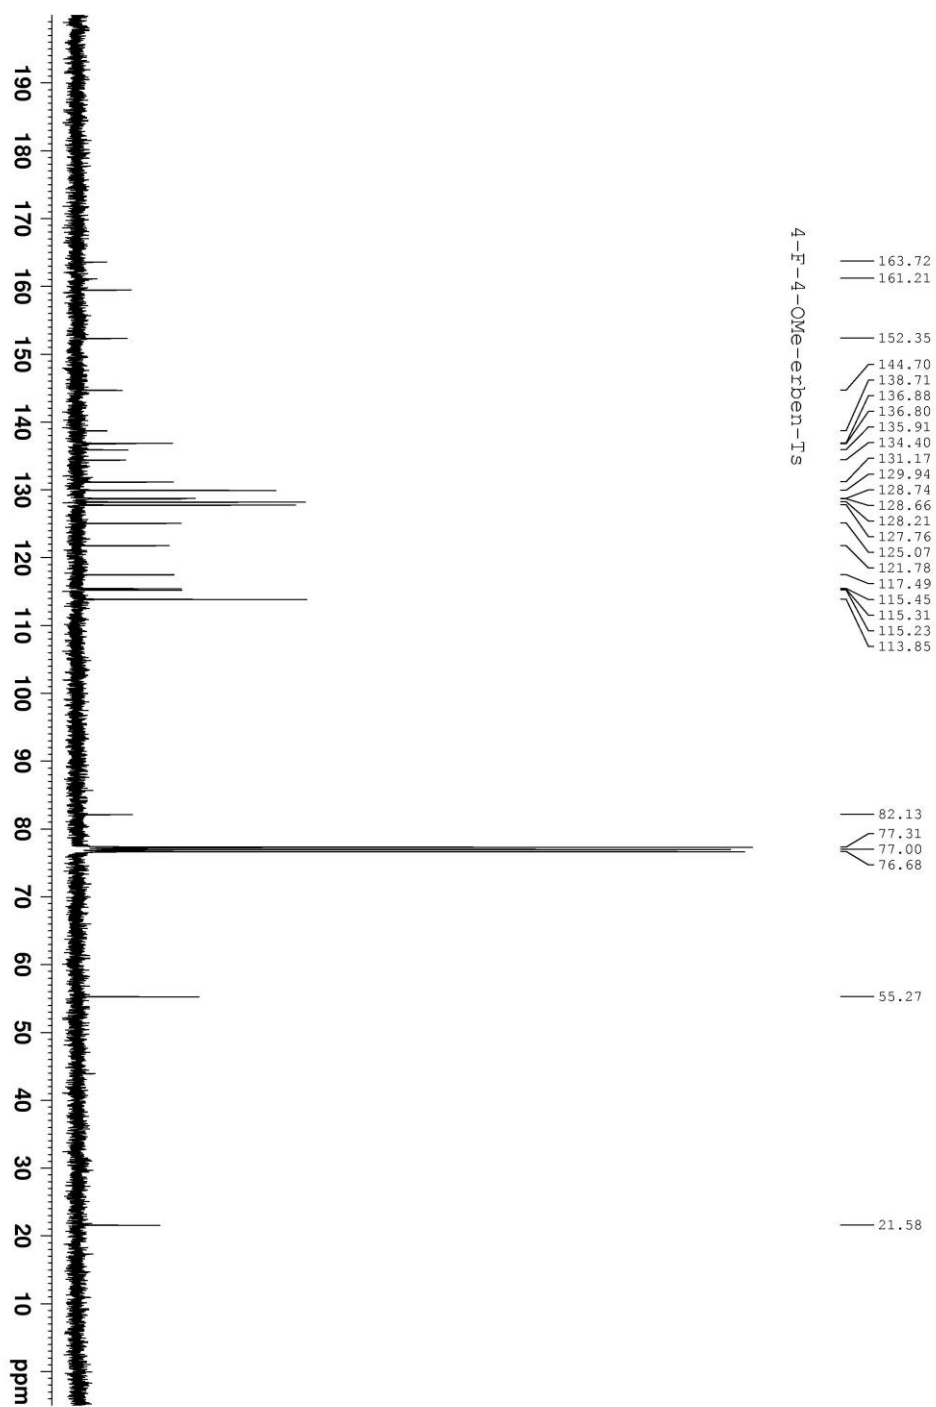

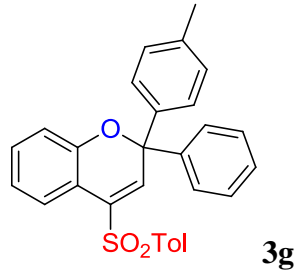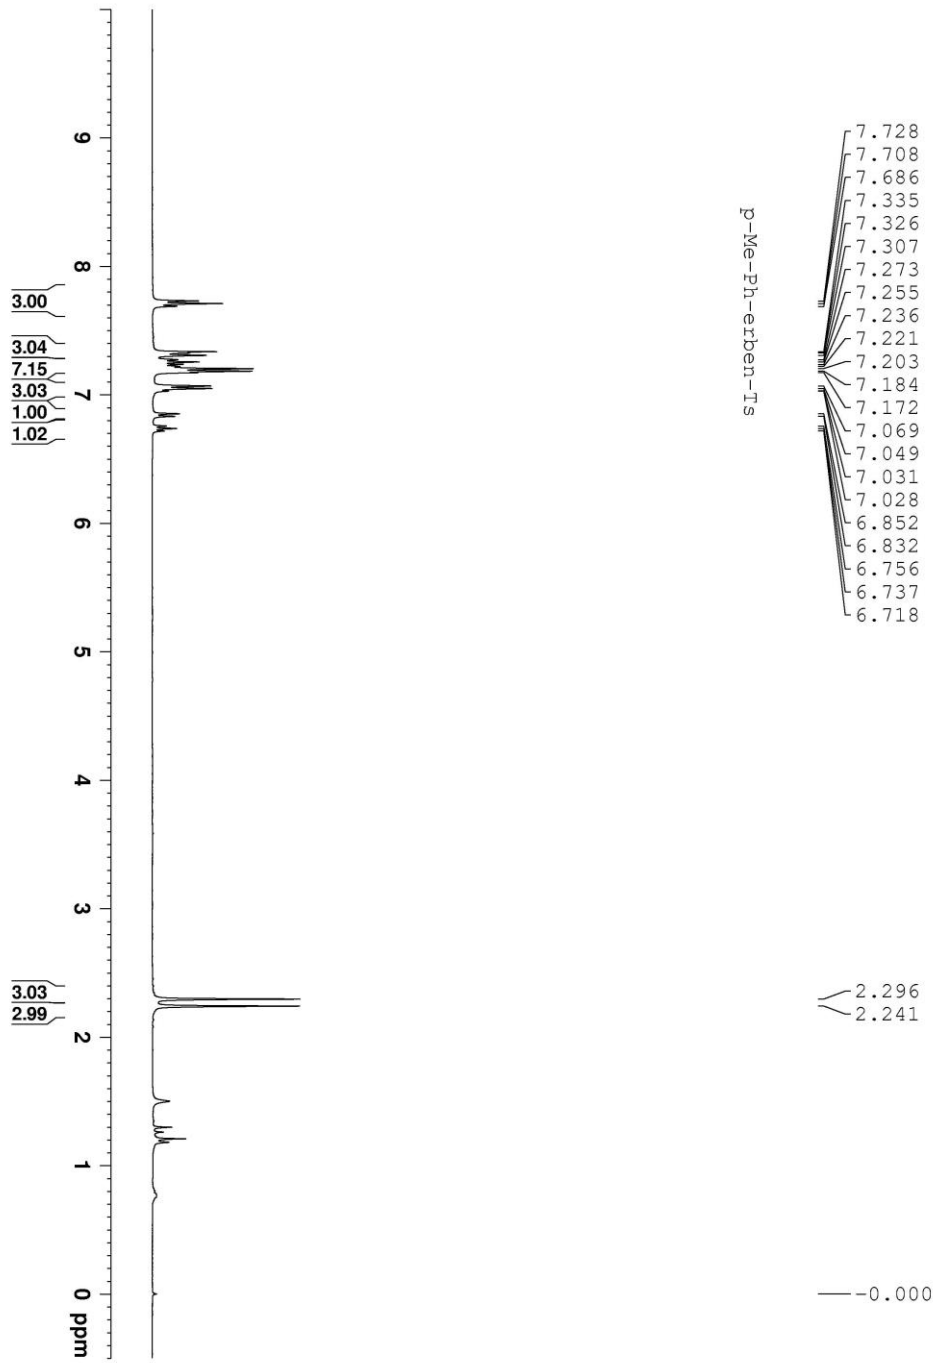

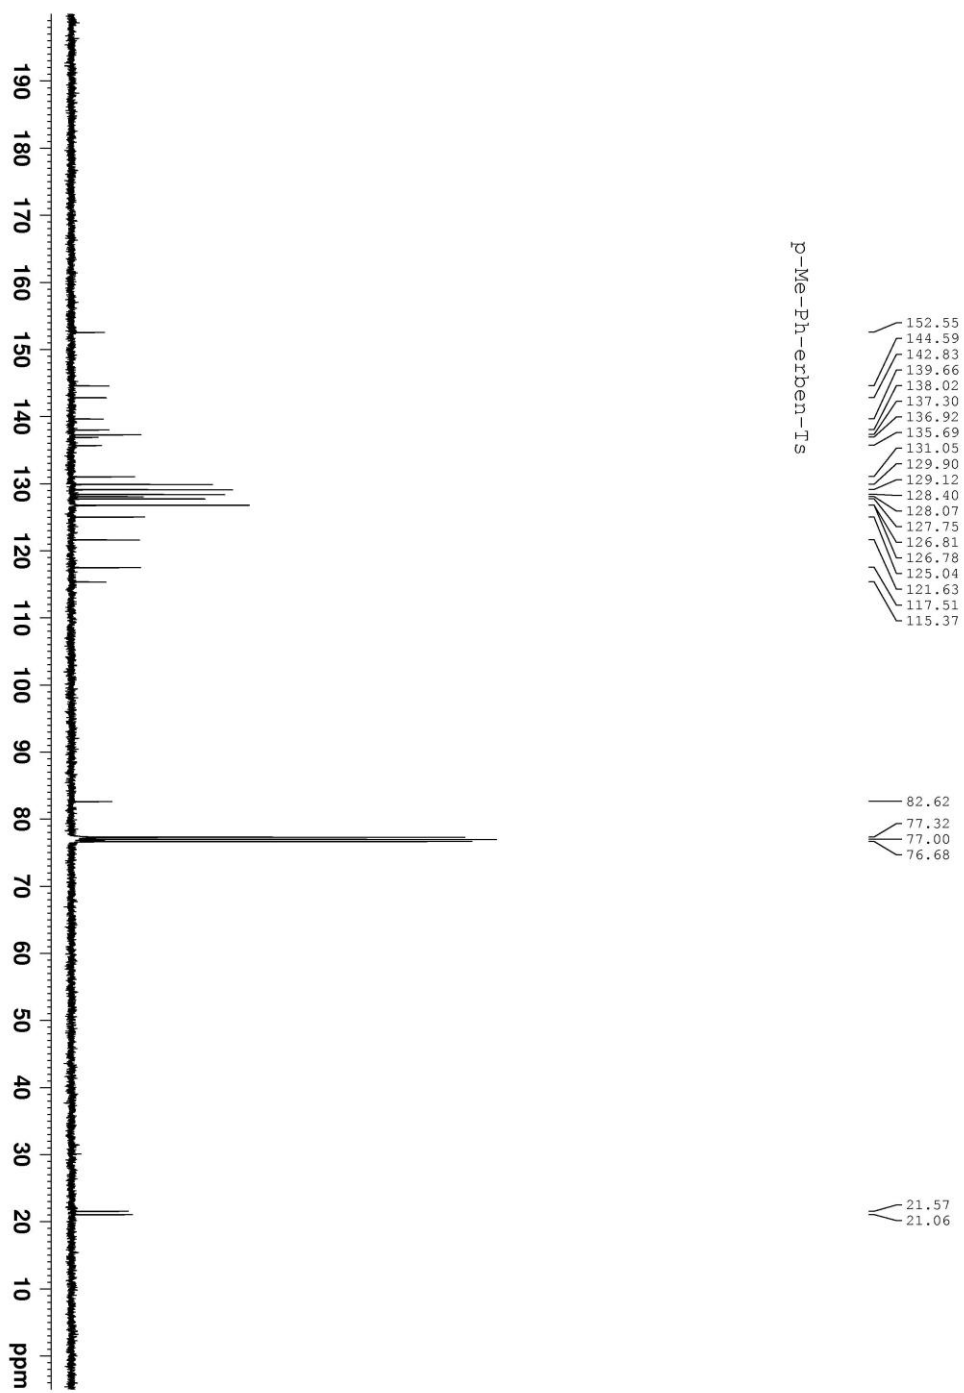

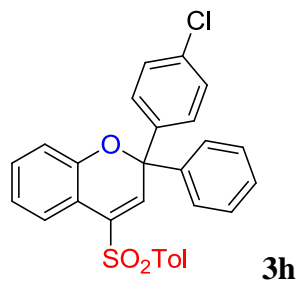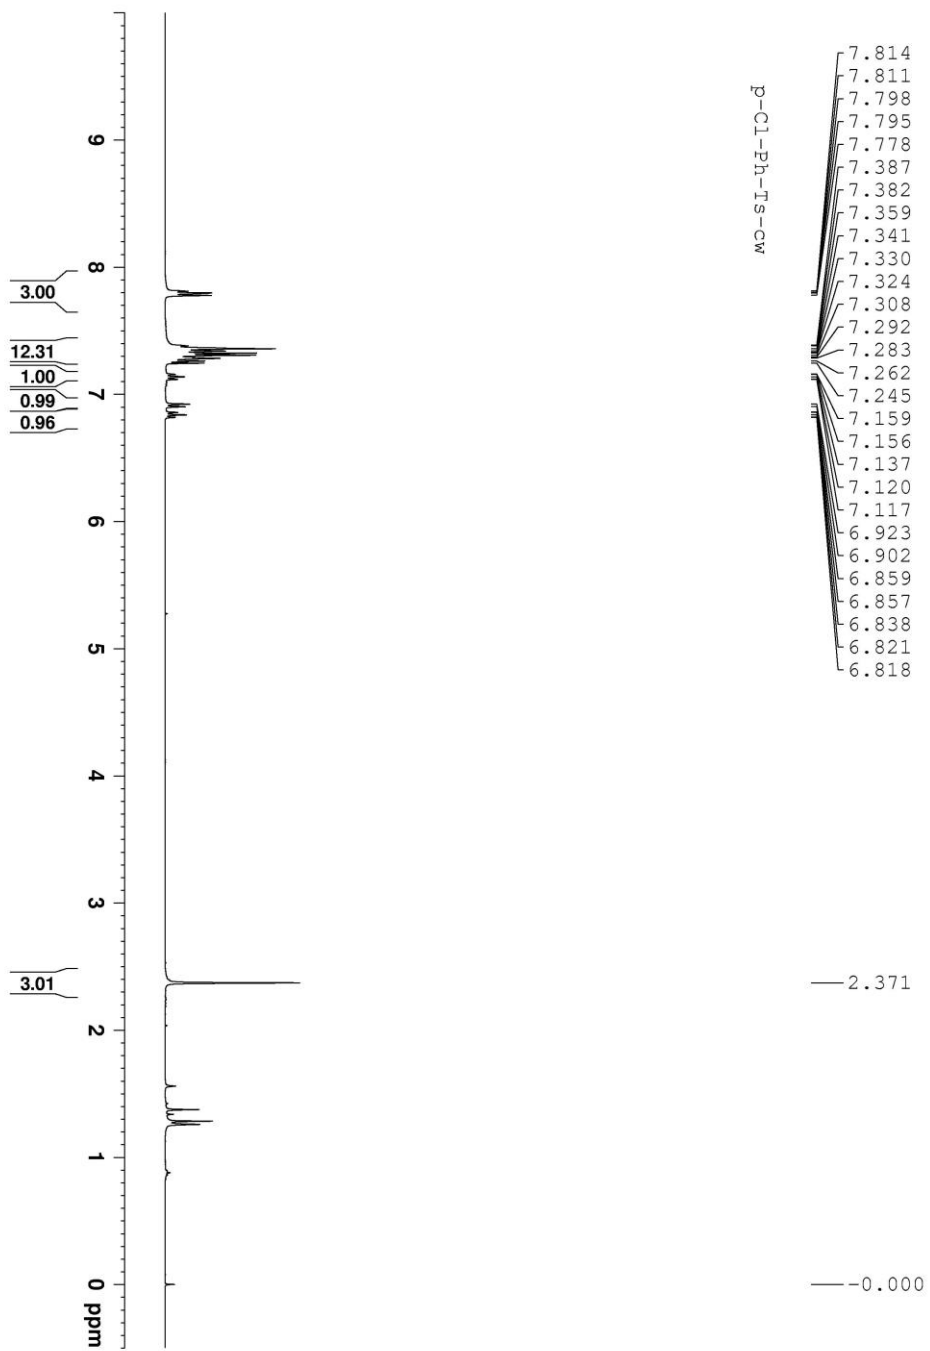

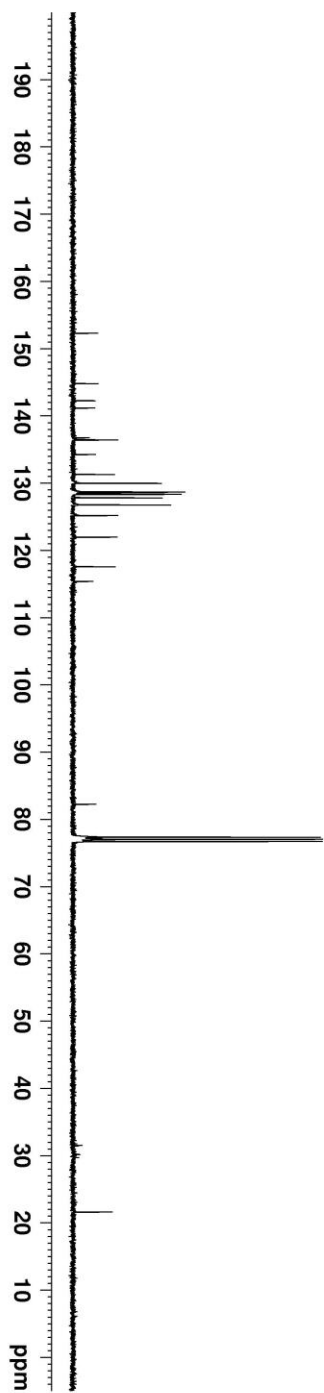

p-Cl-ph-erben-Ts

- 152.28
- 144.75
- 142.23
- 141.14
- 136.73
- 136.40
- 136.35
- 134.22
- 131.26
- 129.95
- 128.66
- 128.57
- 128.36
- 128.29
- 127.79
- 126.72
- 125.15
- 121.93
- 117.53
- 115.35

- 82.21
- 77.32
- 77.00
- 76.68

- 21.58



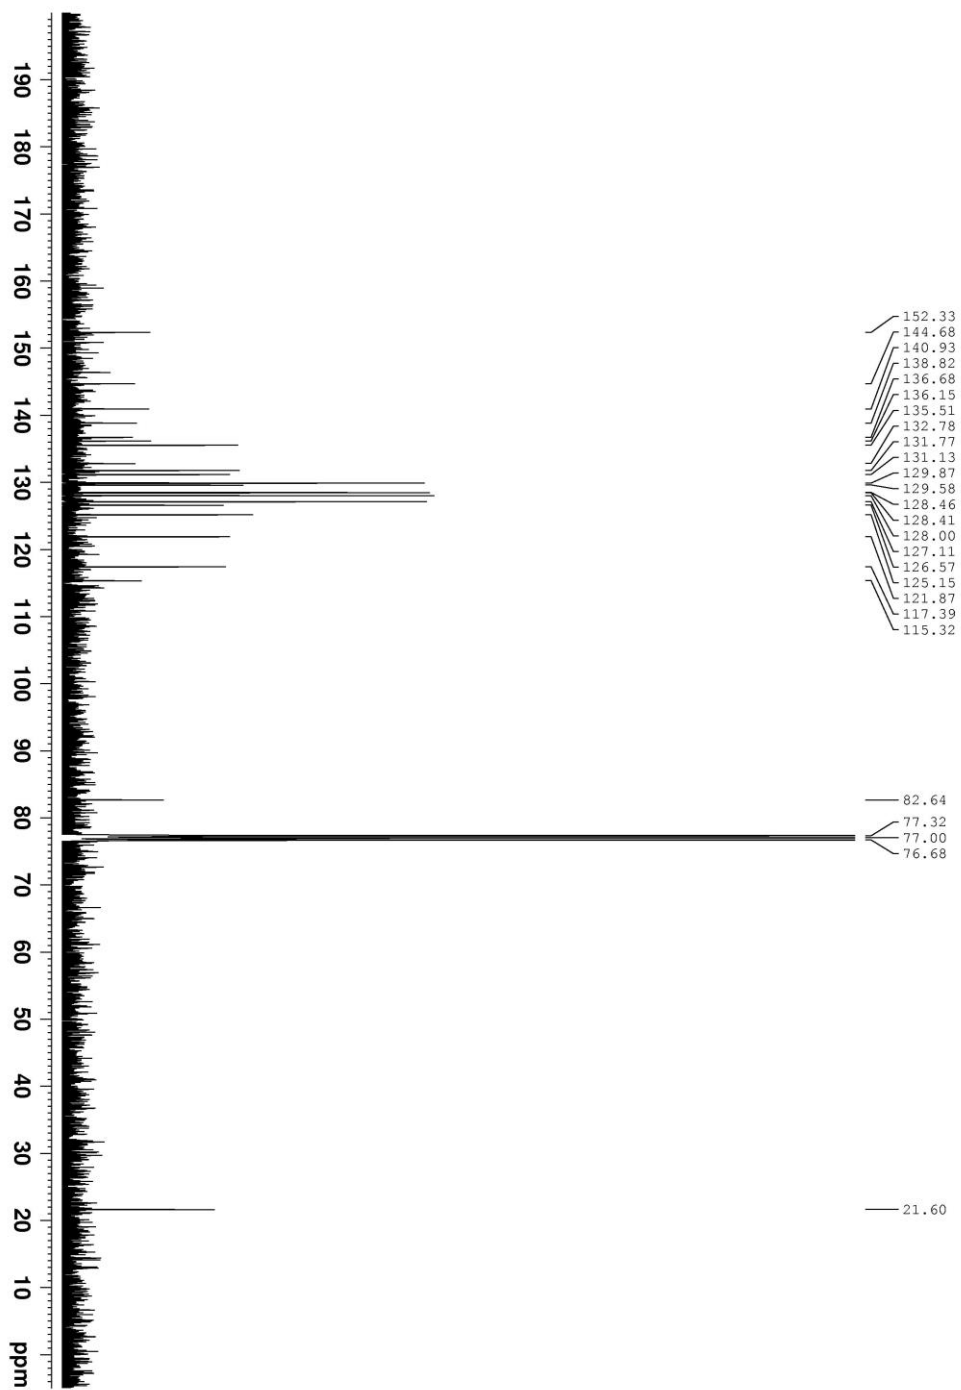

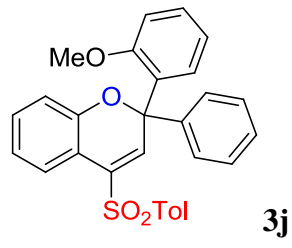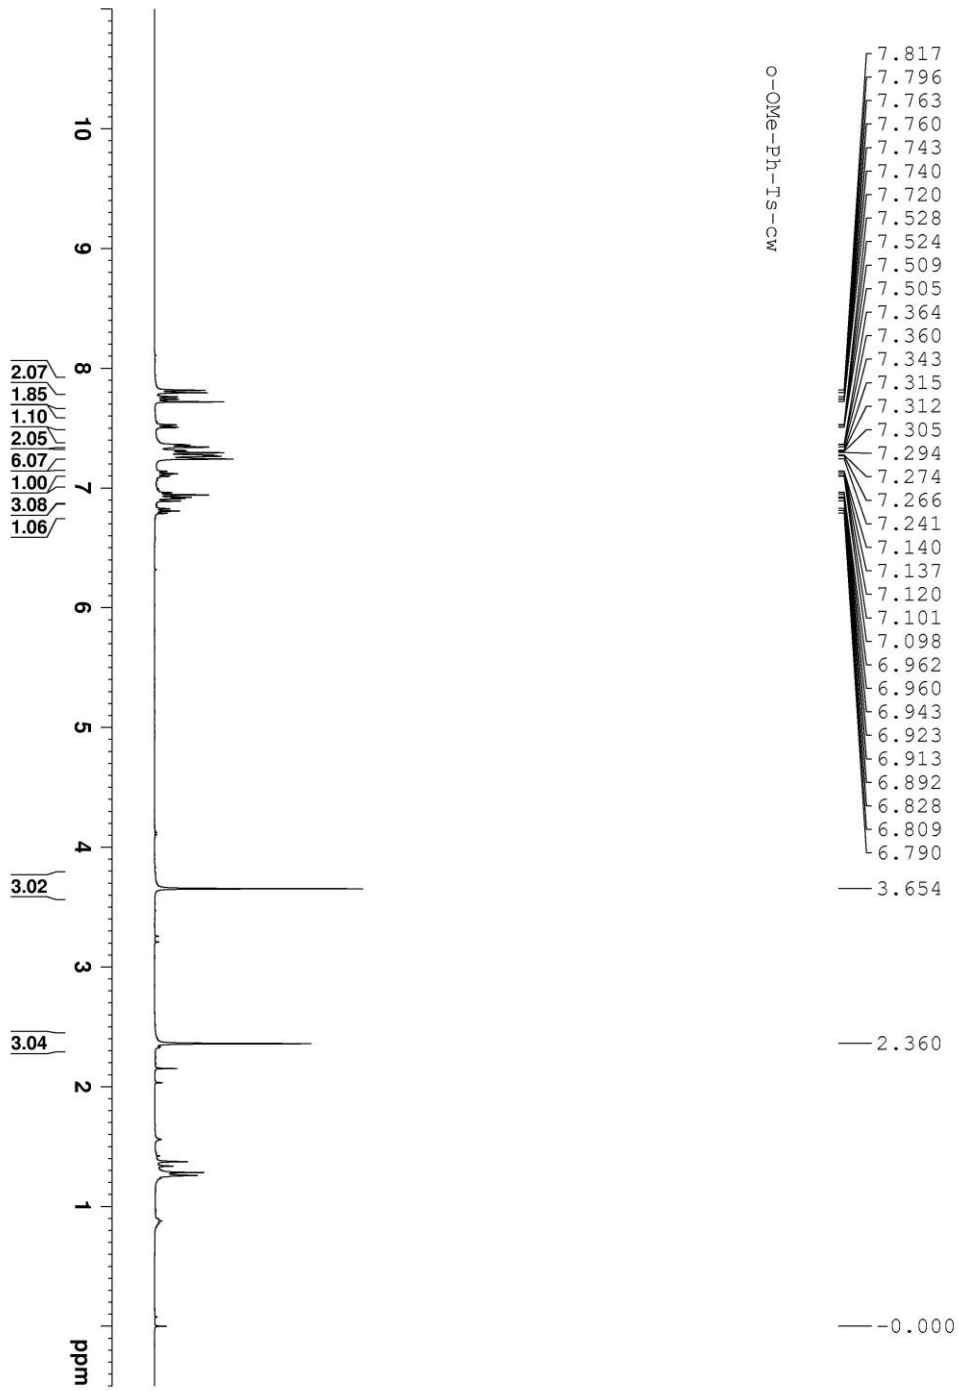



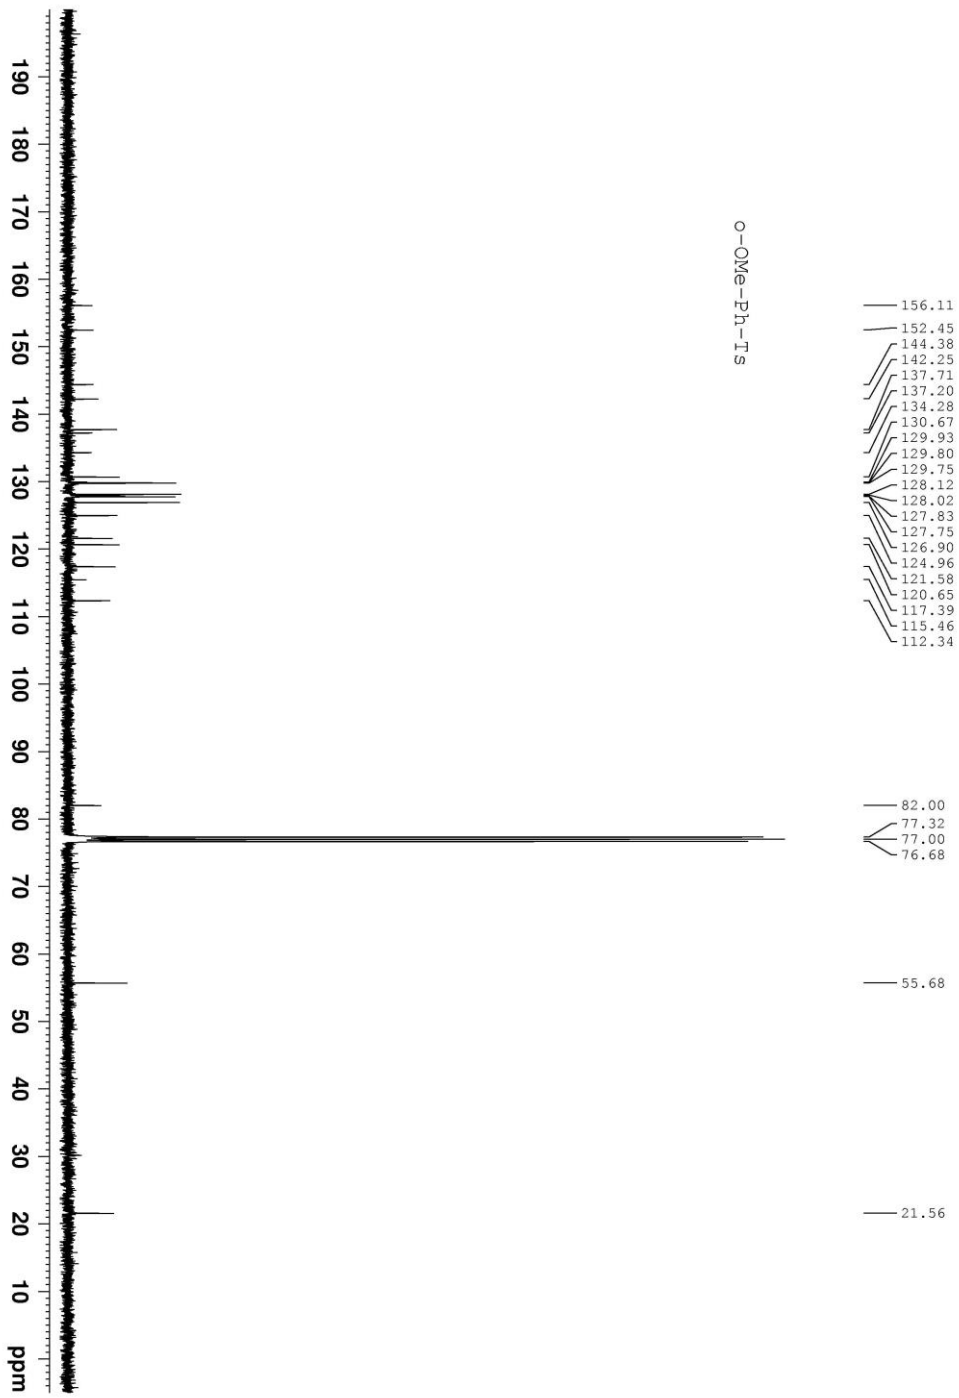

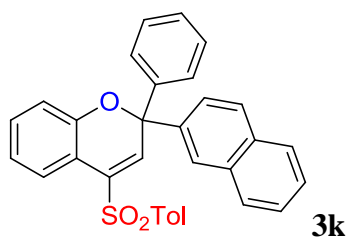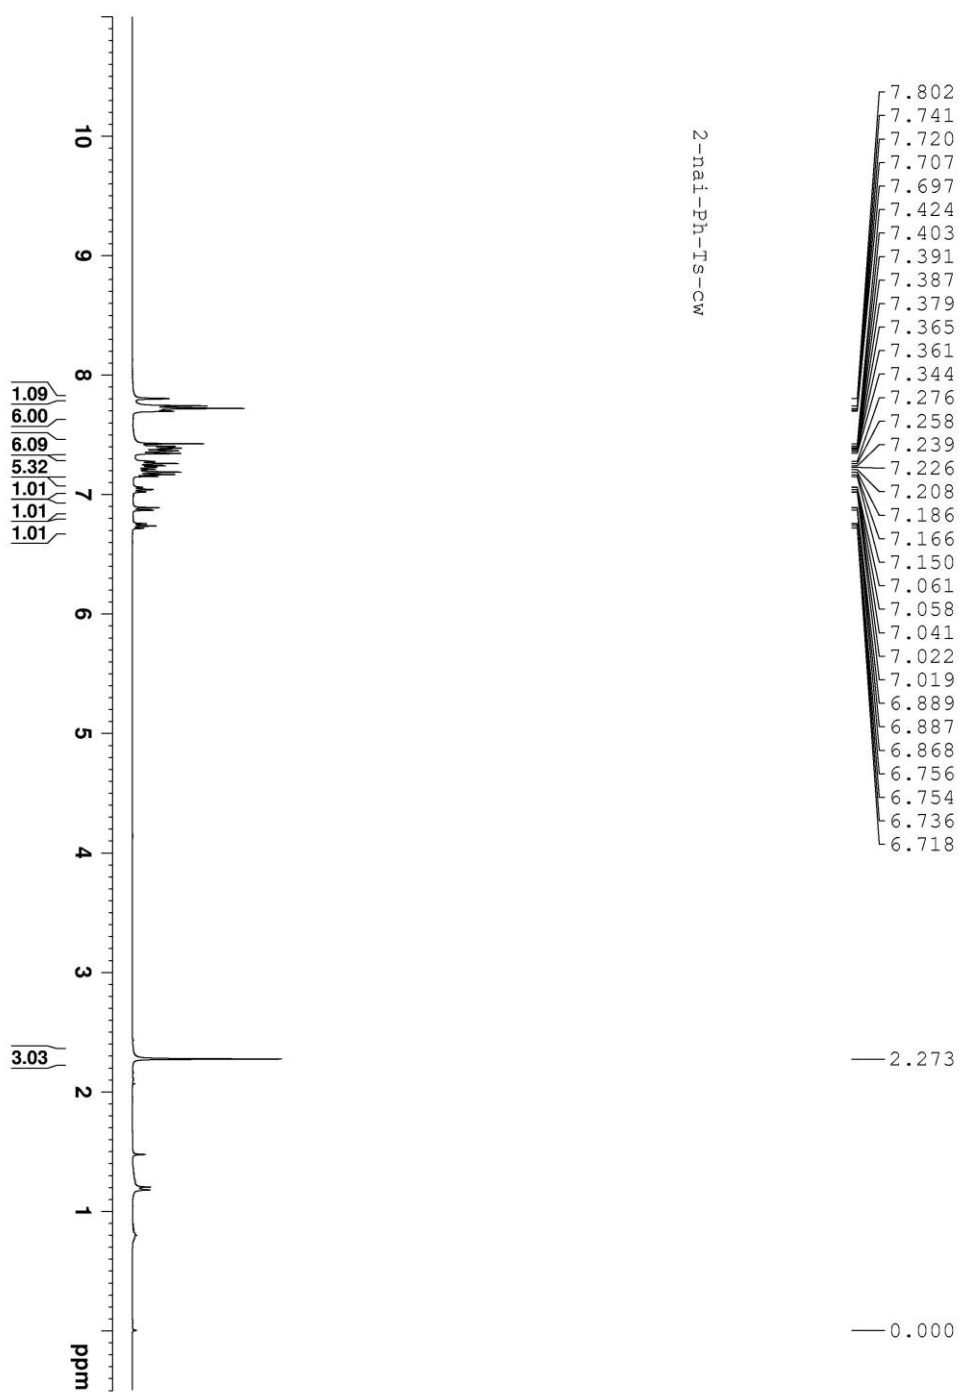

2-nai-Ph-Is-CW

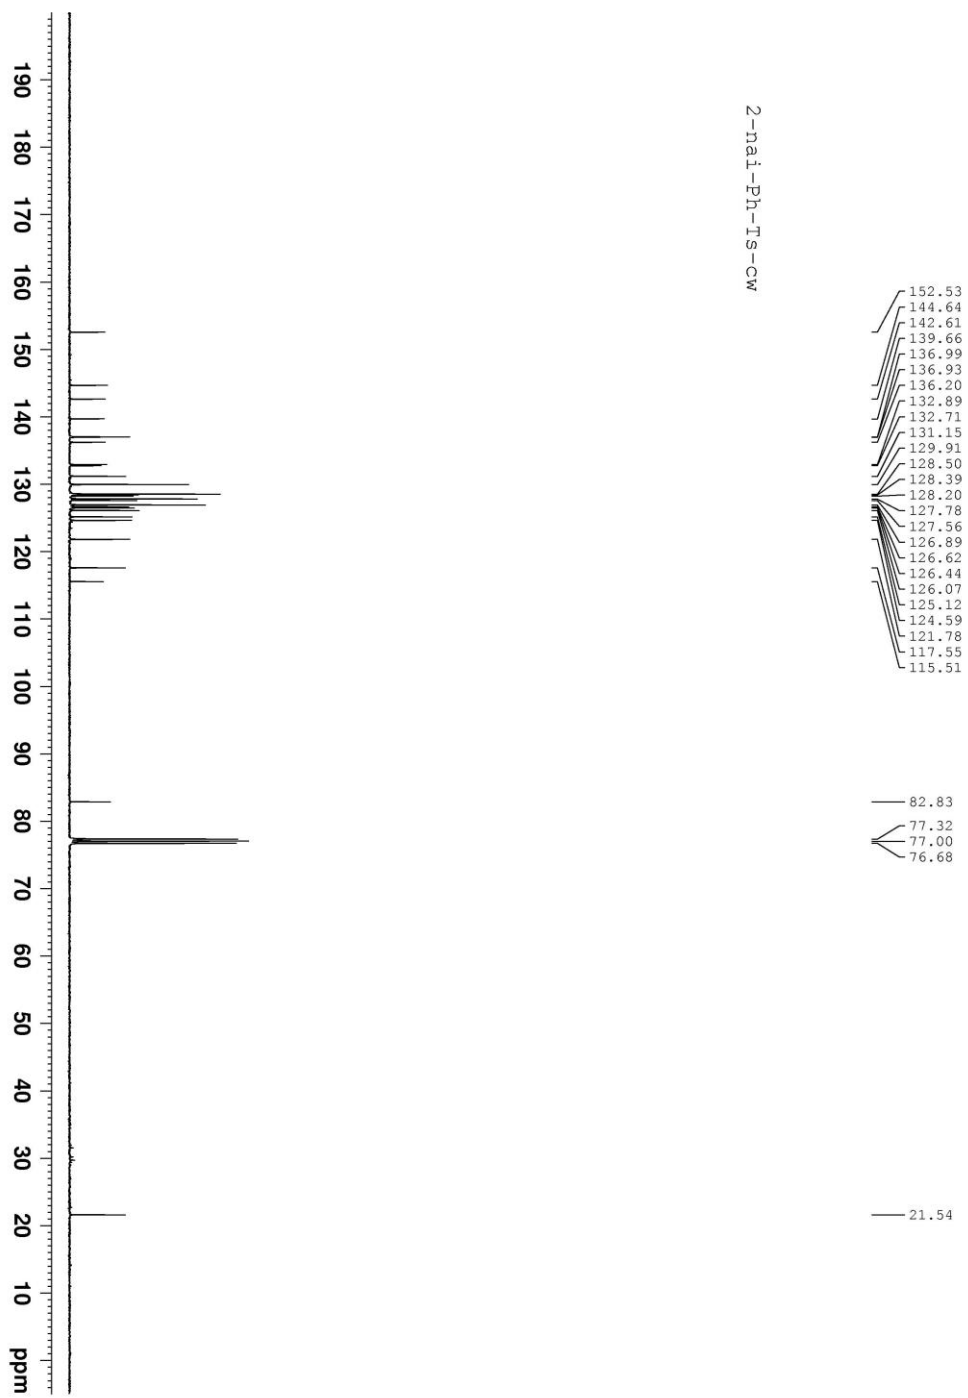

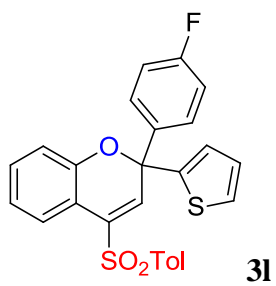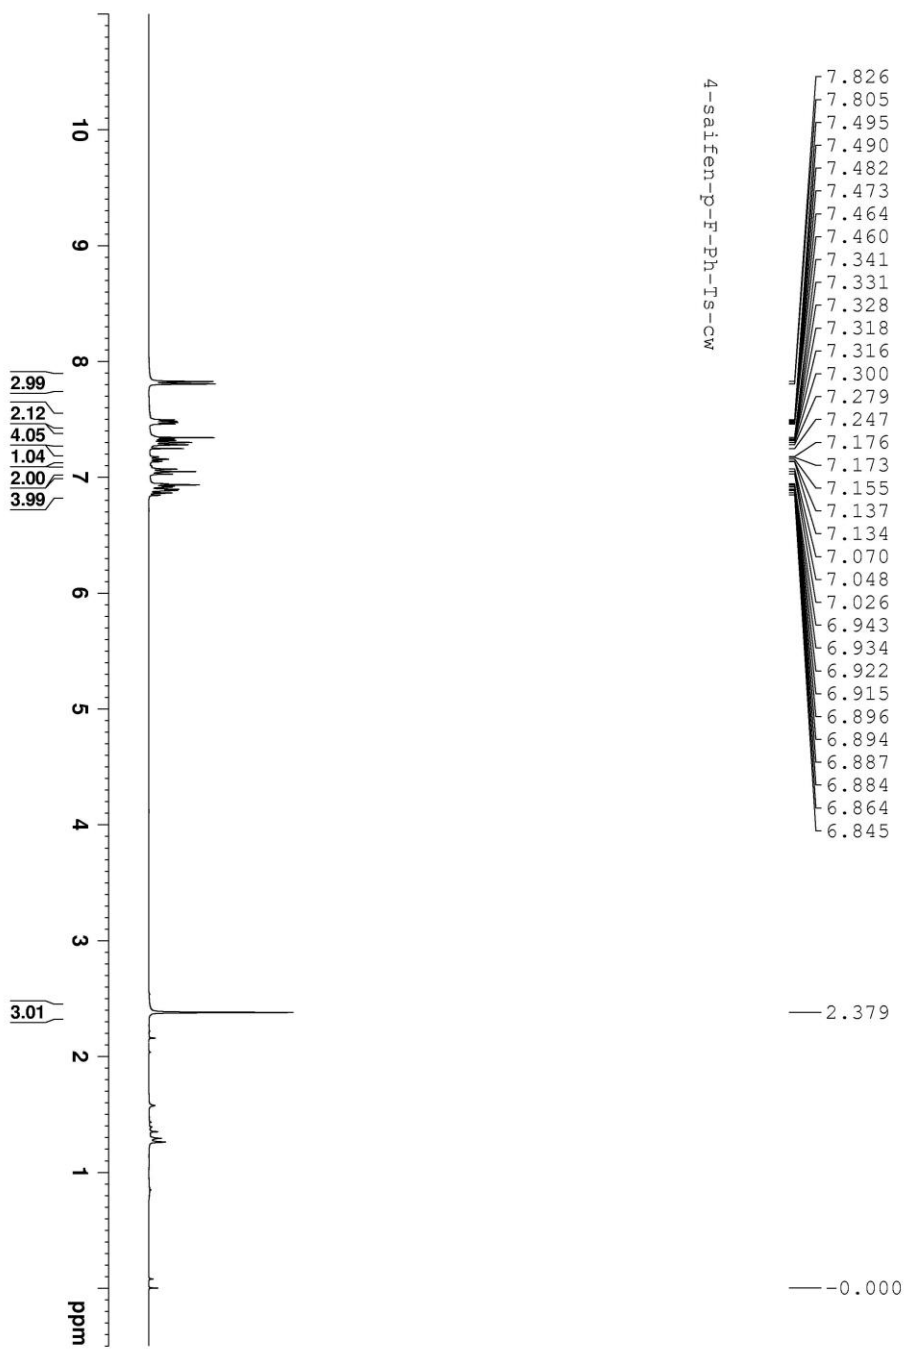

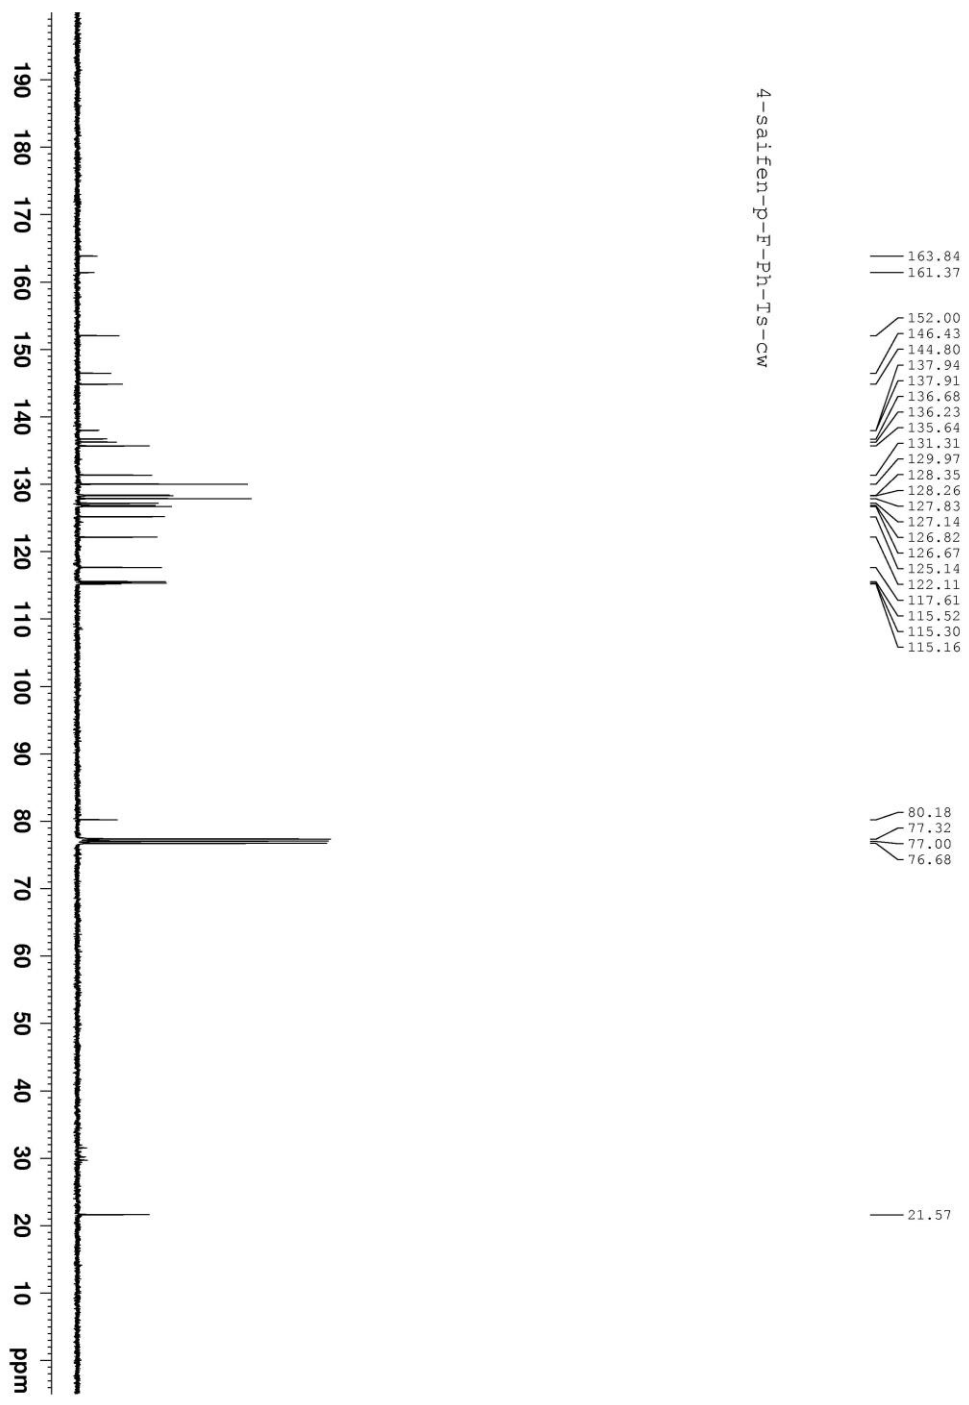

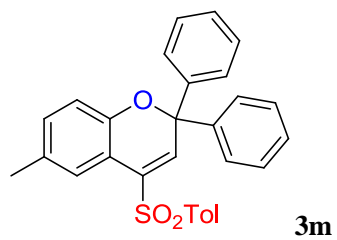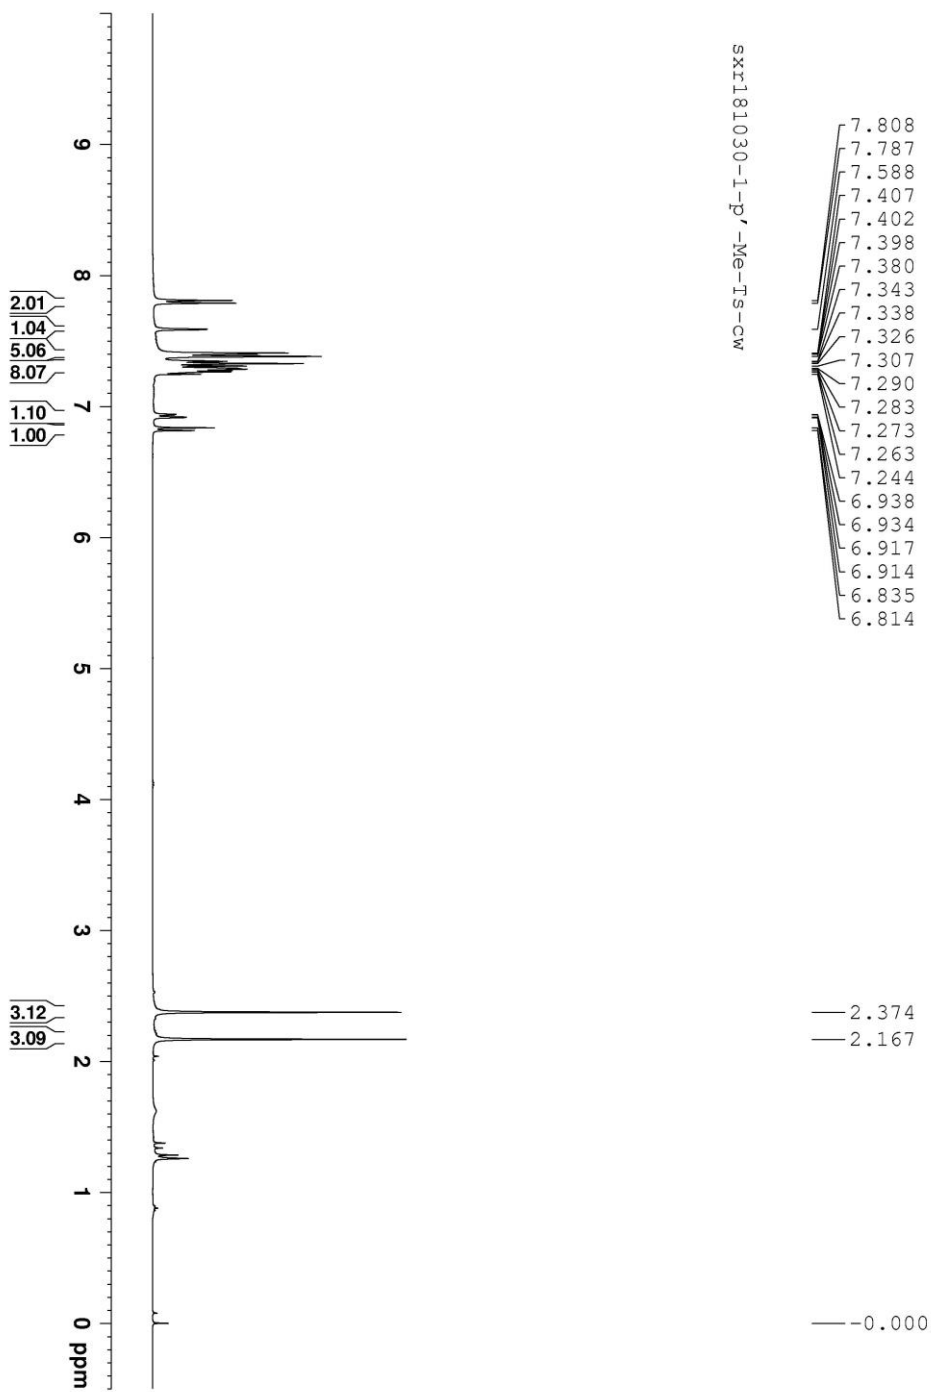

sxr181030-1-p'-Me-Ts-cw

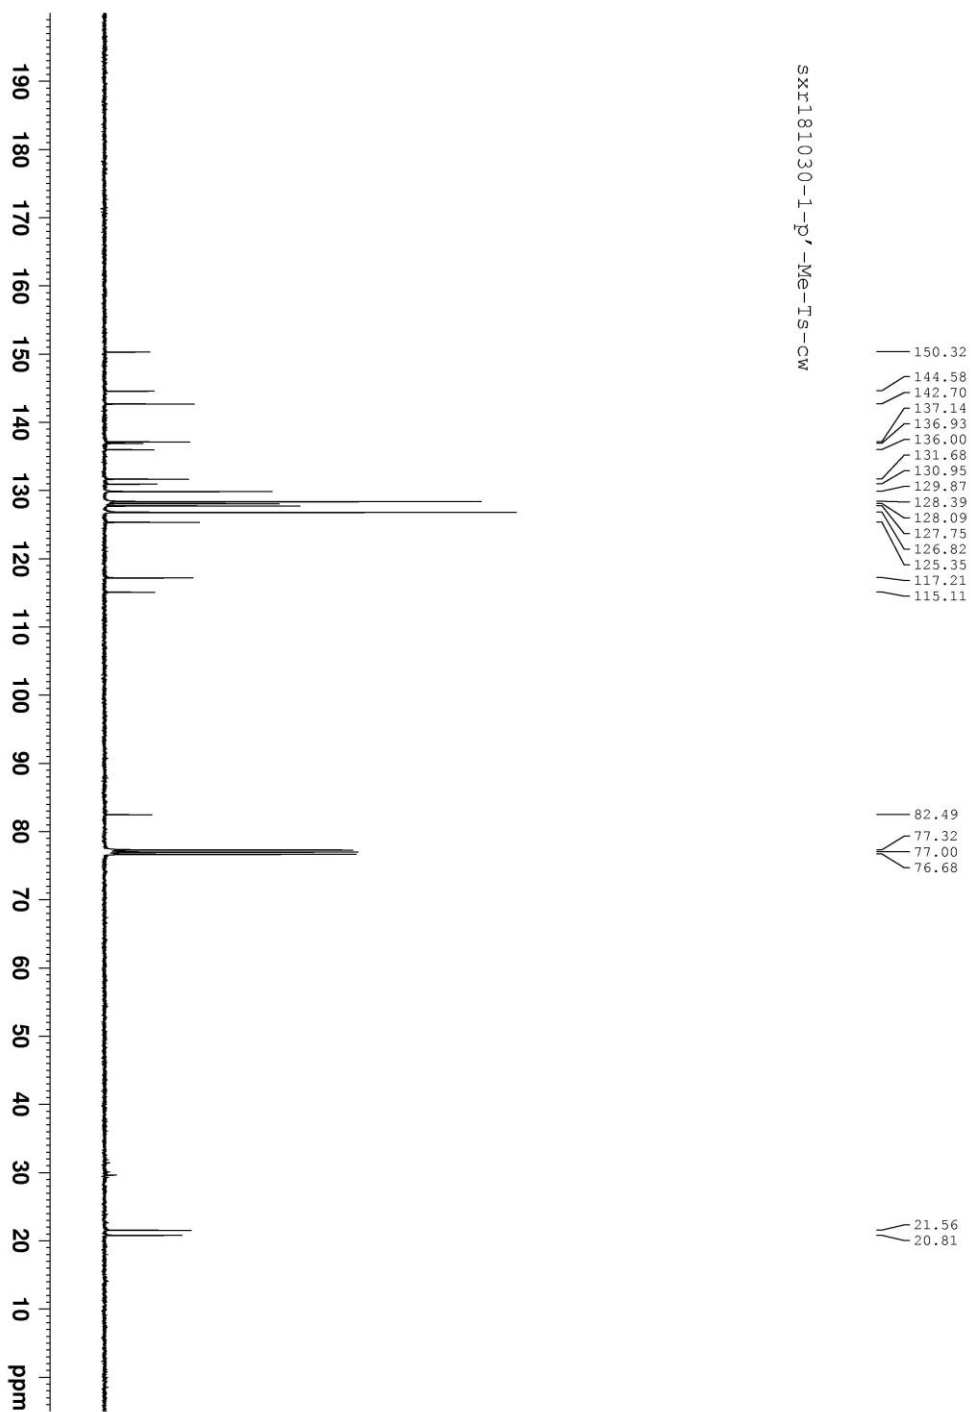

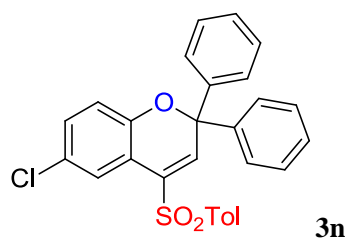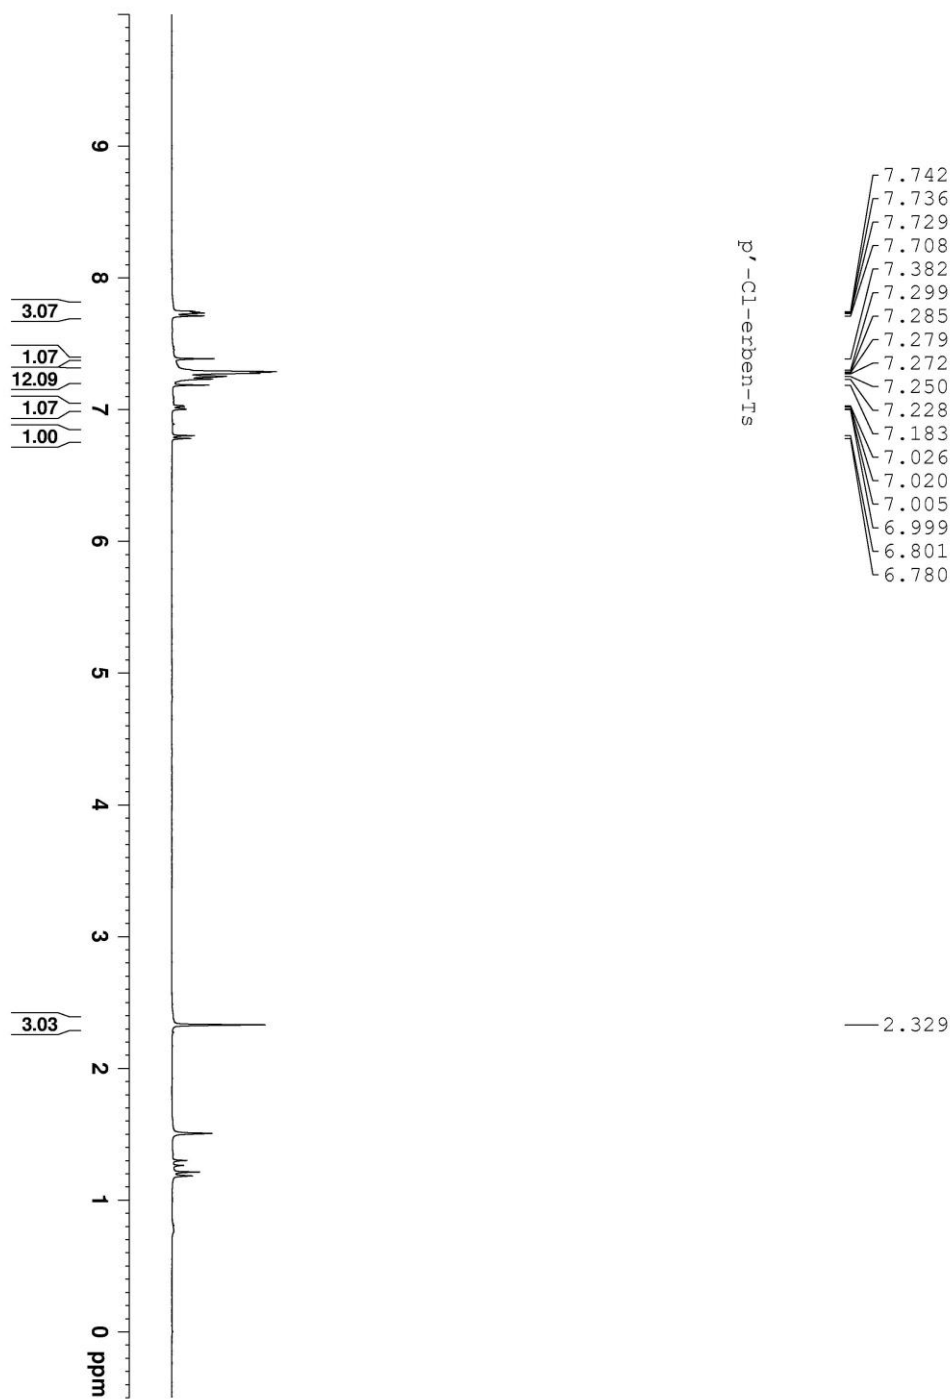



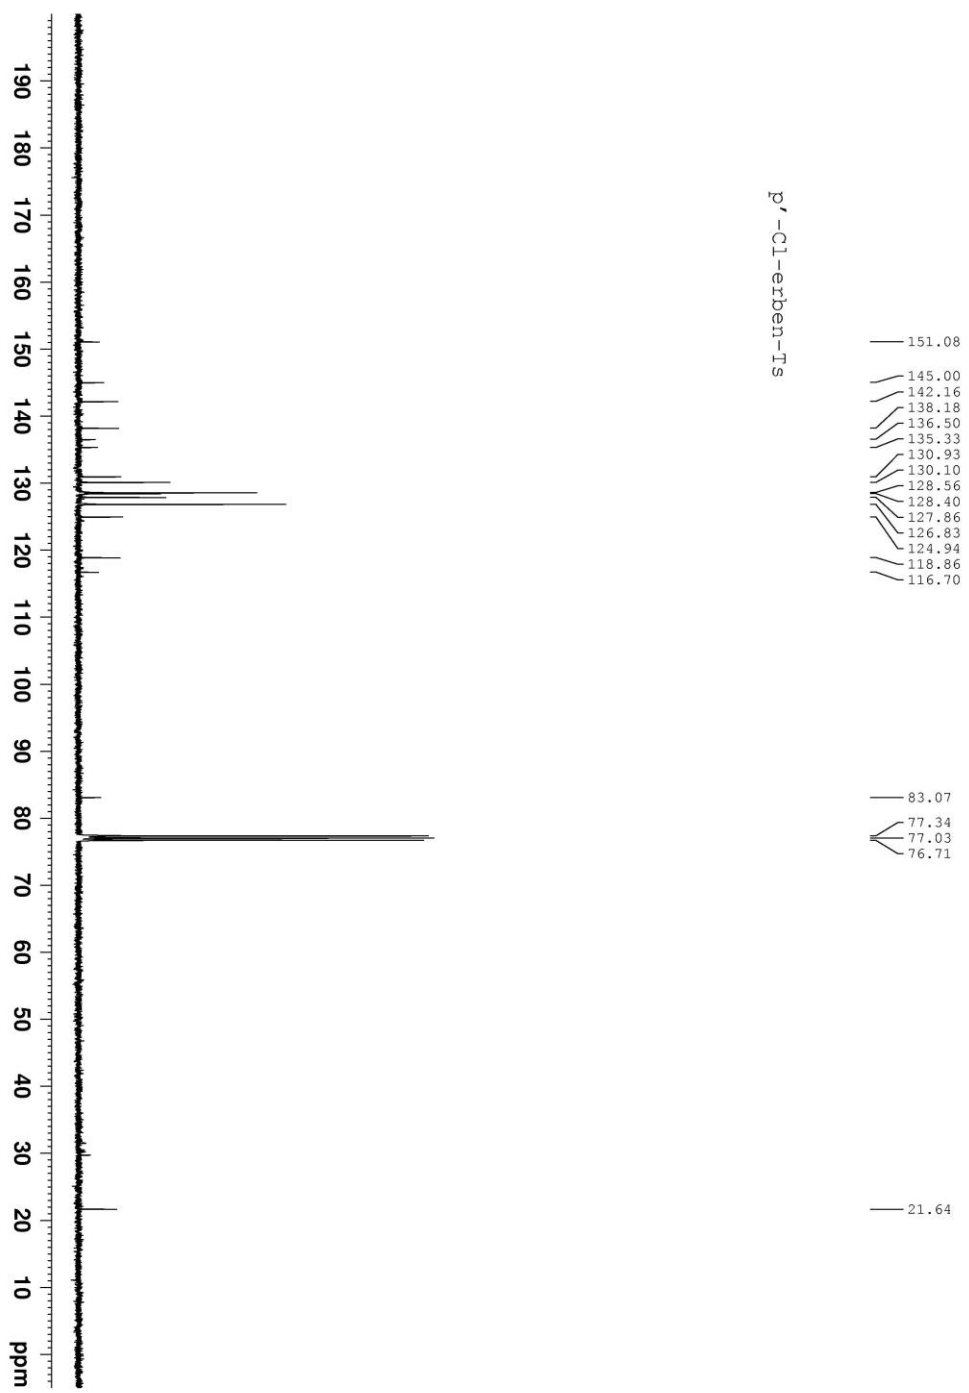

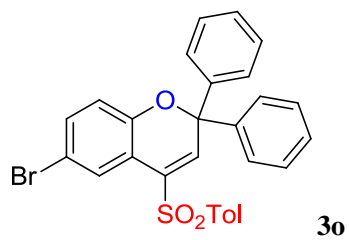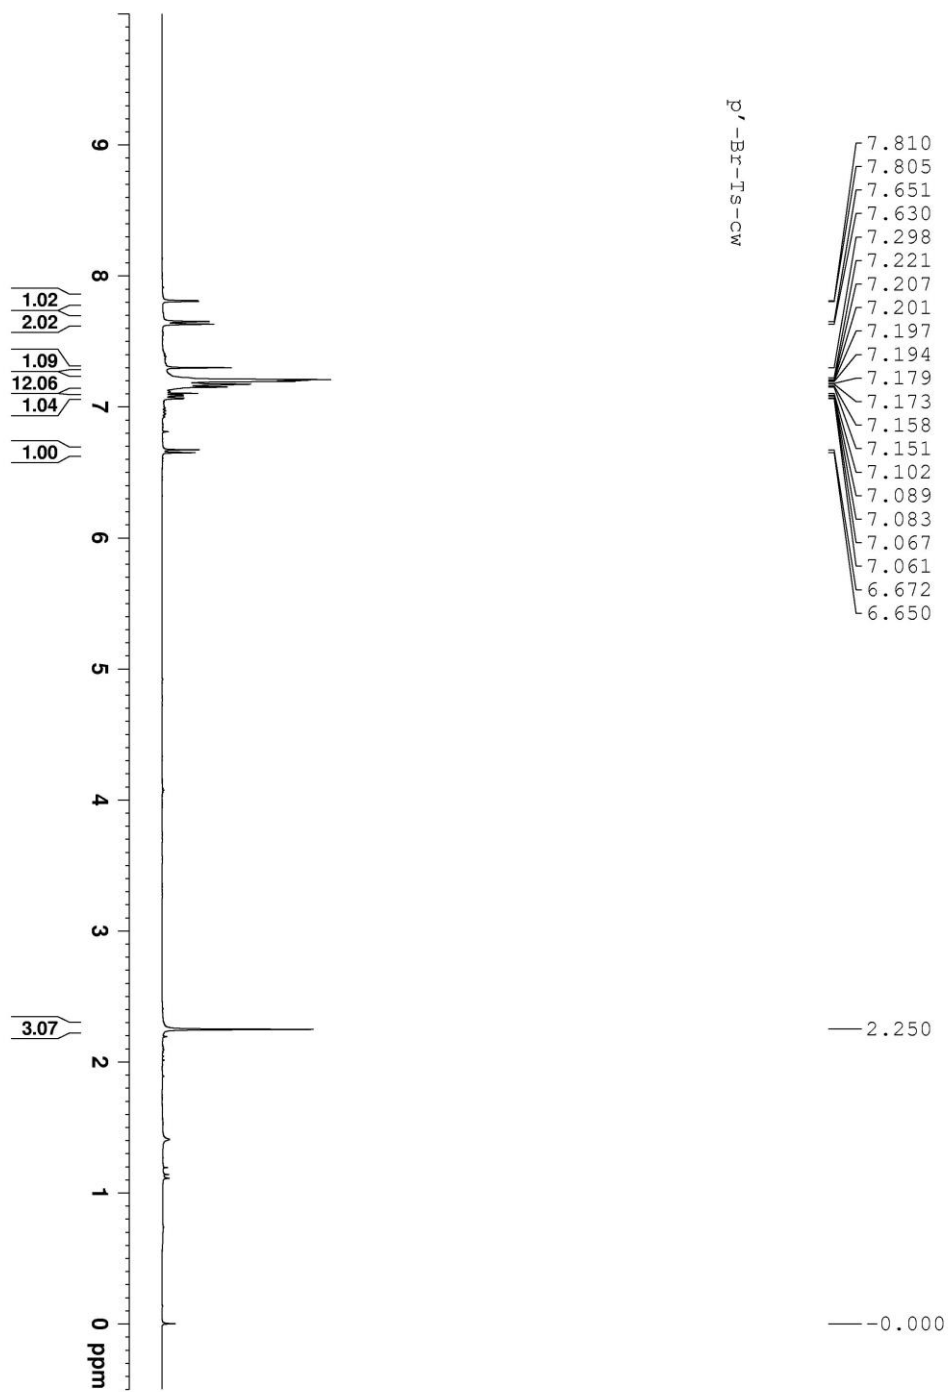

p'-Br-Ts-CW

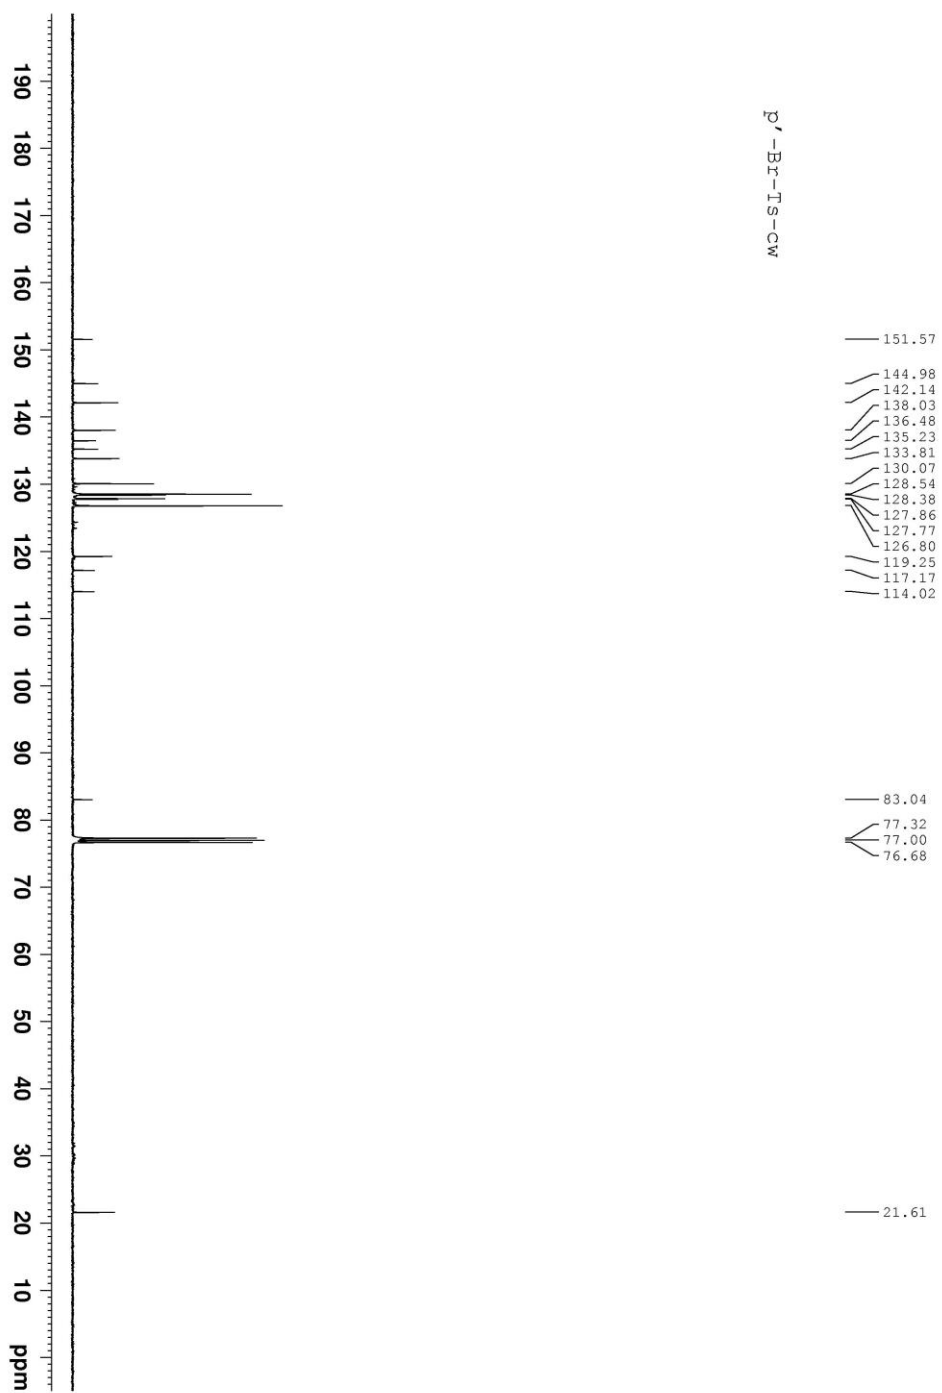

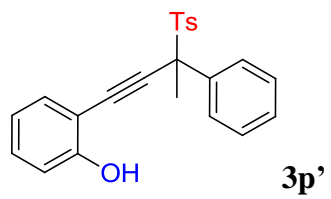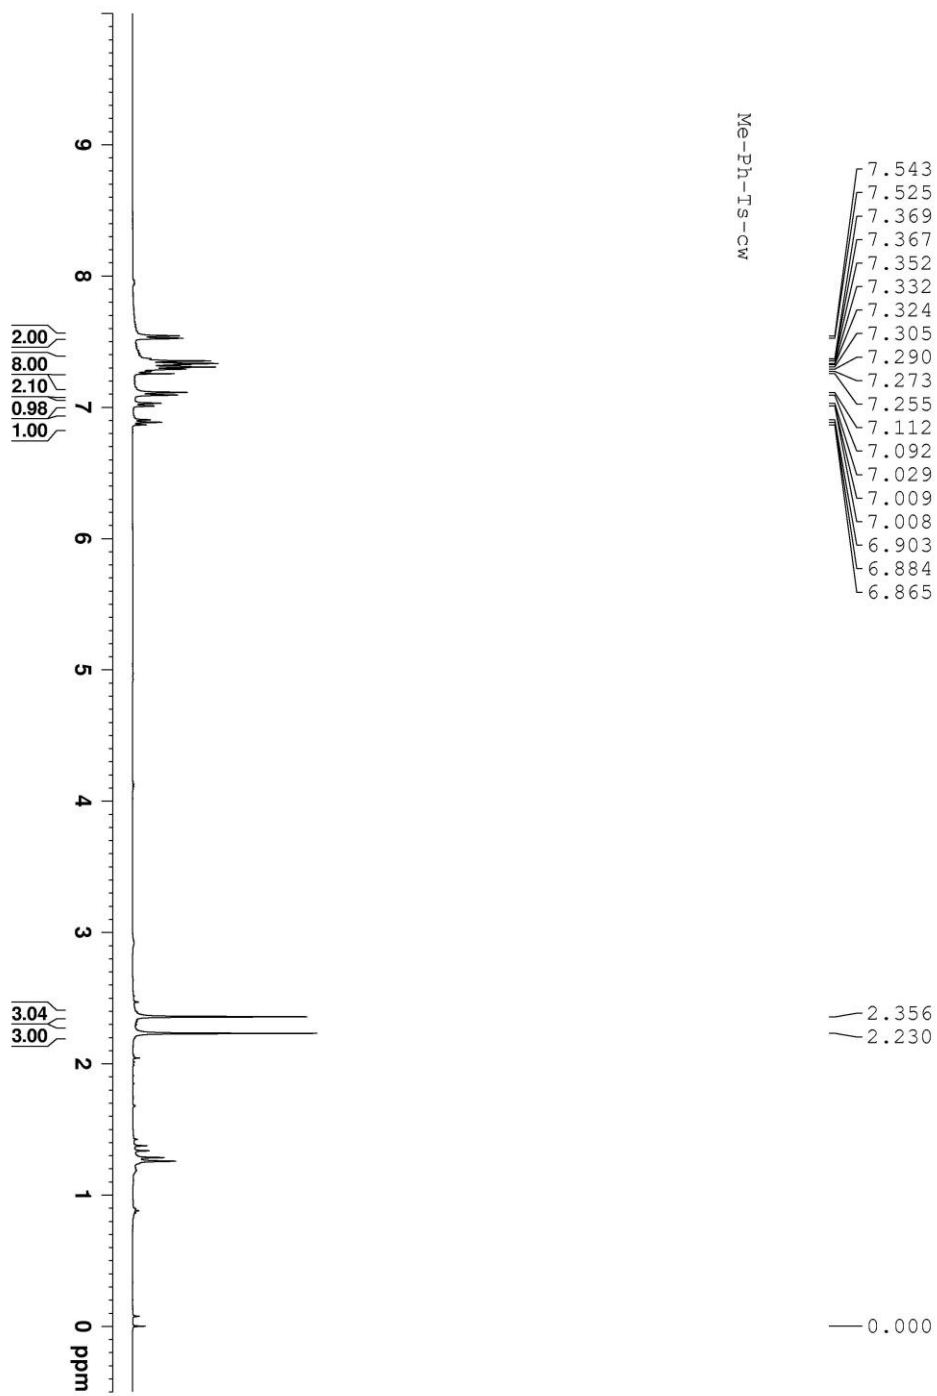

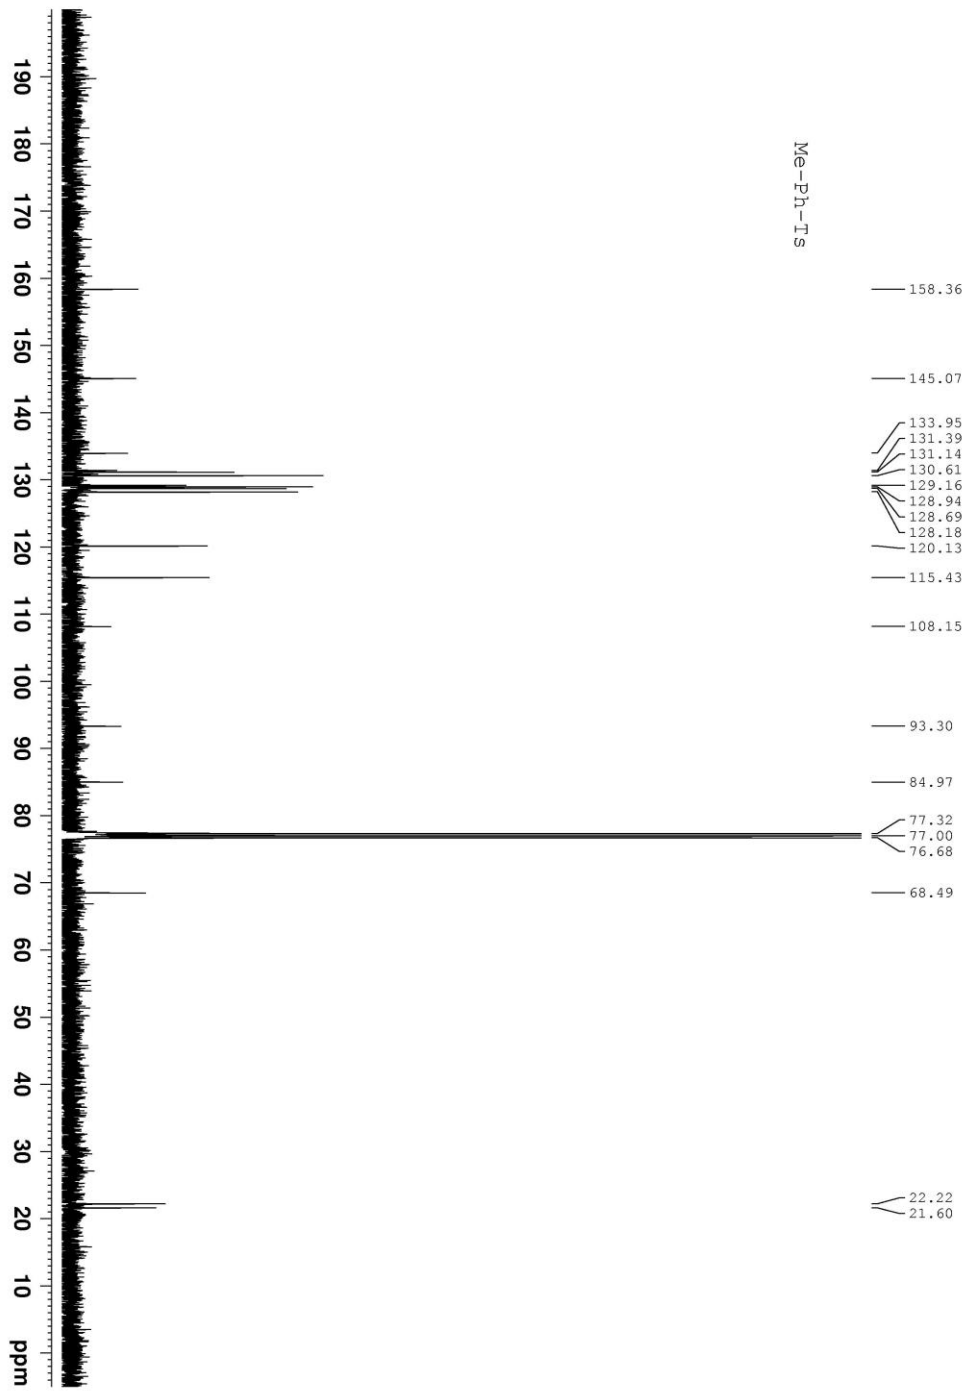

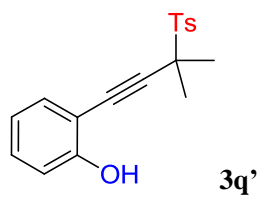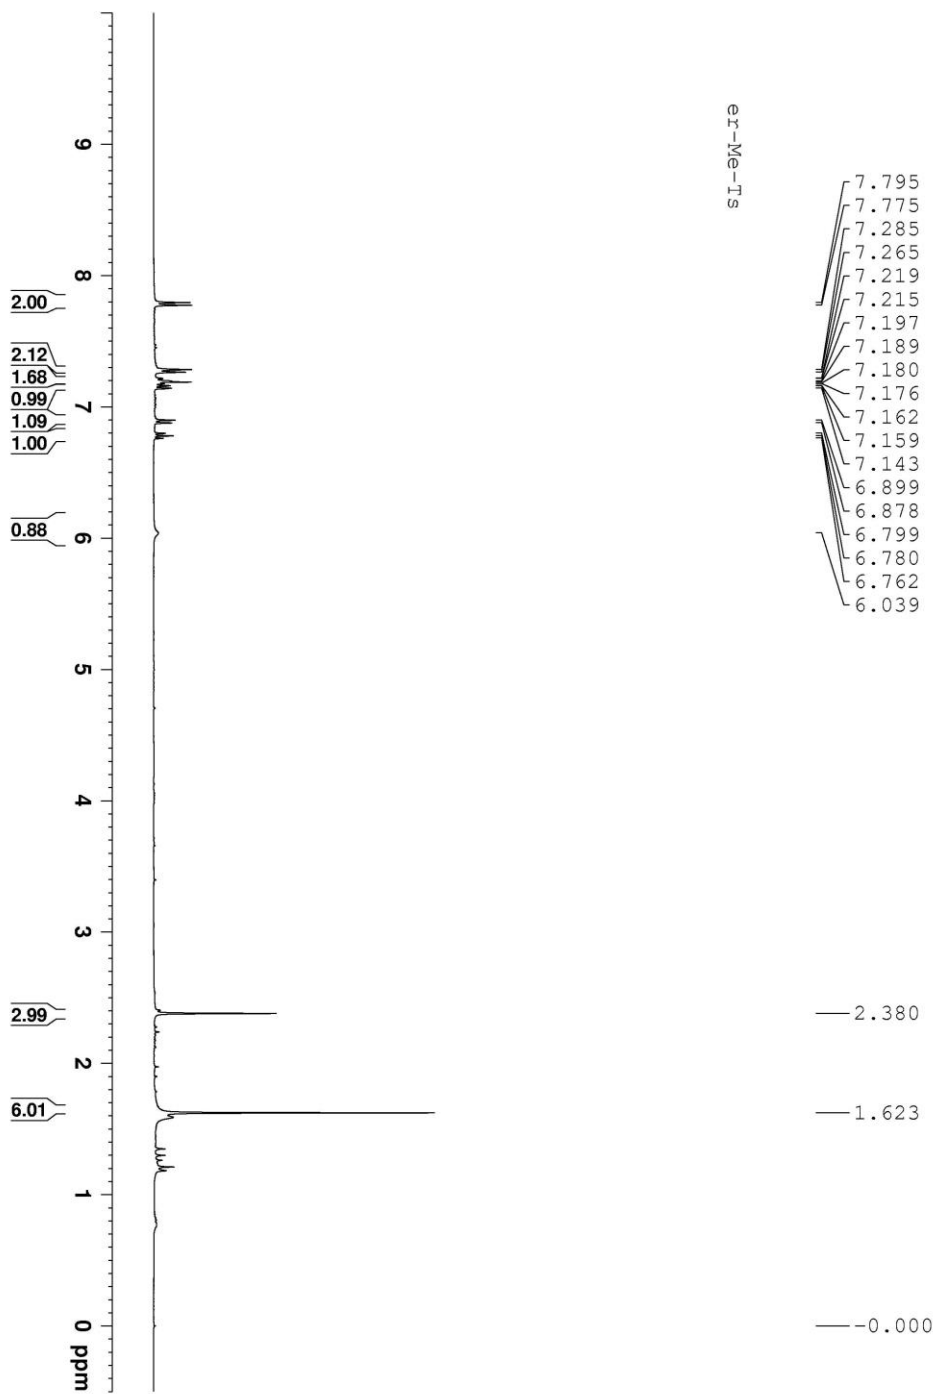

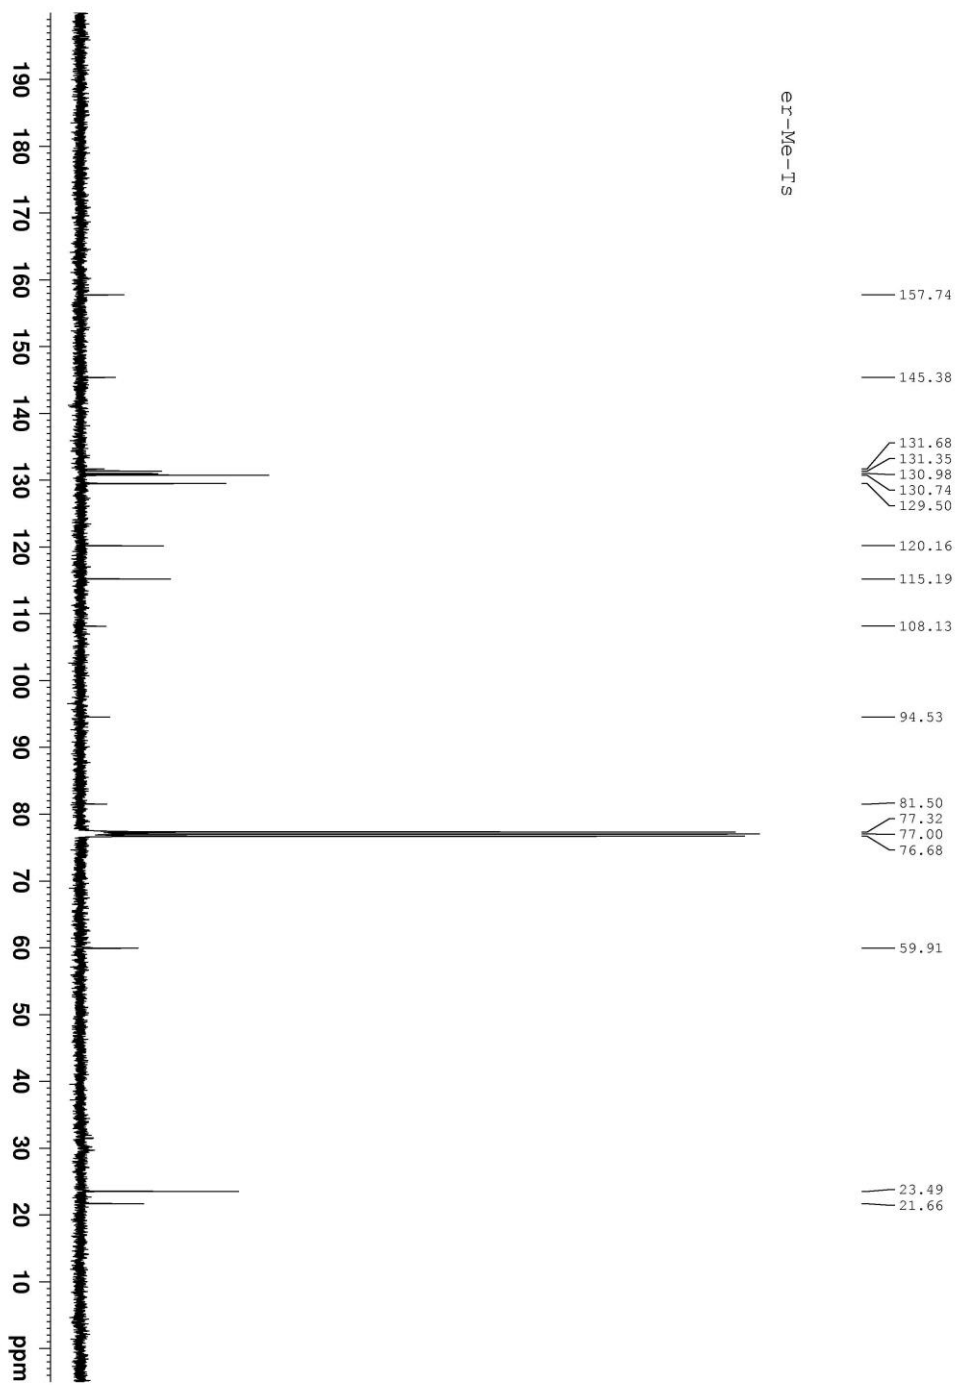

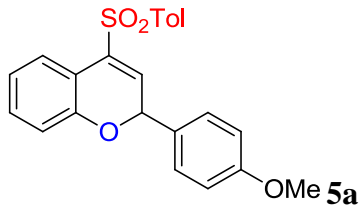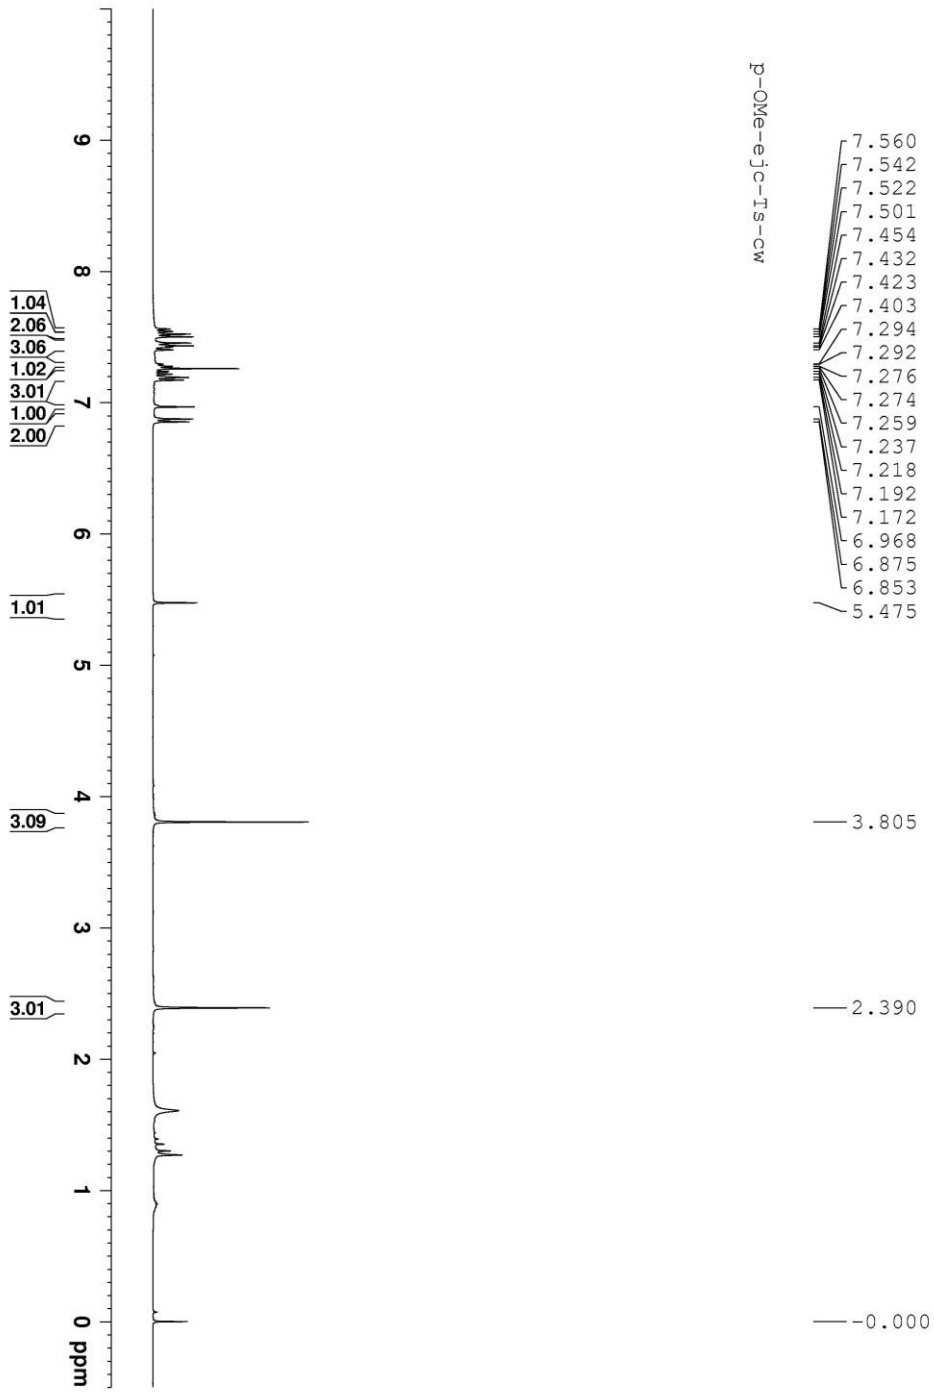



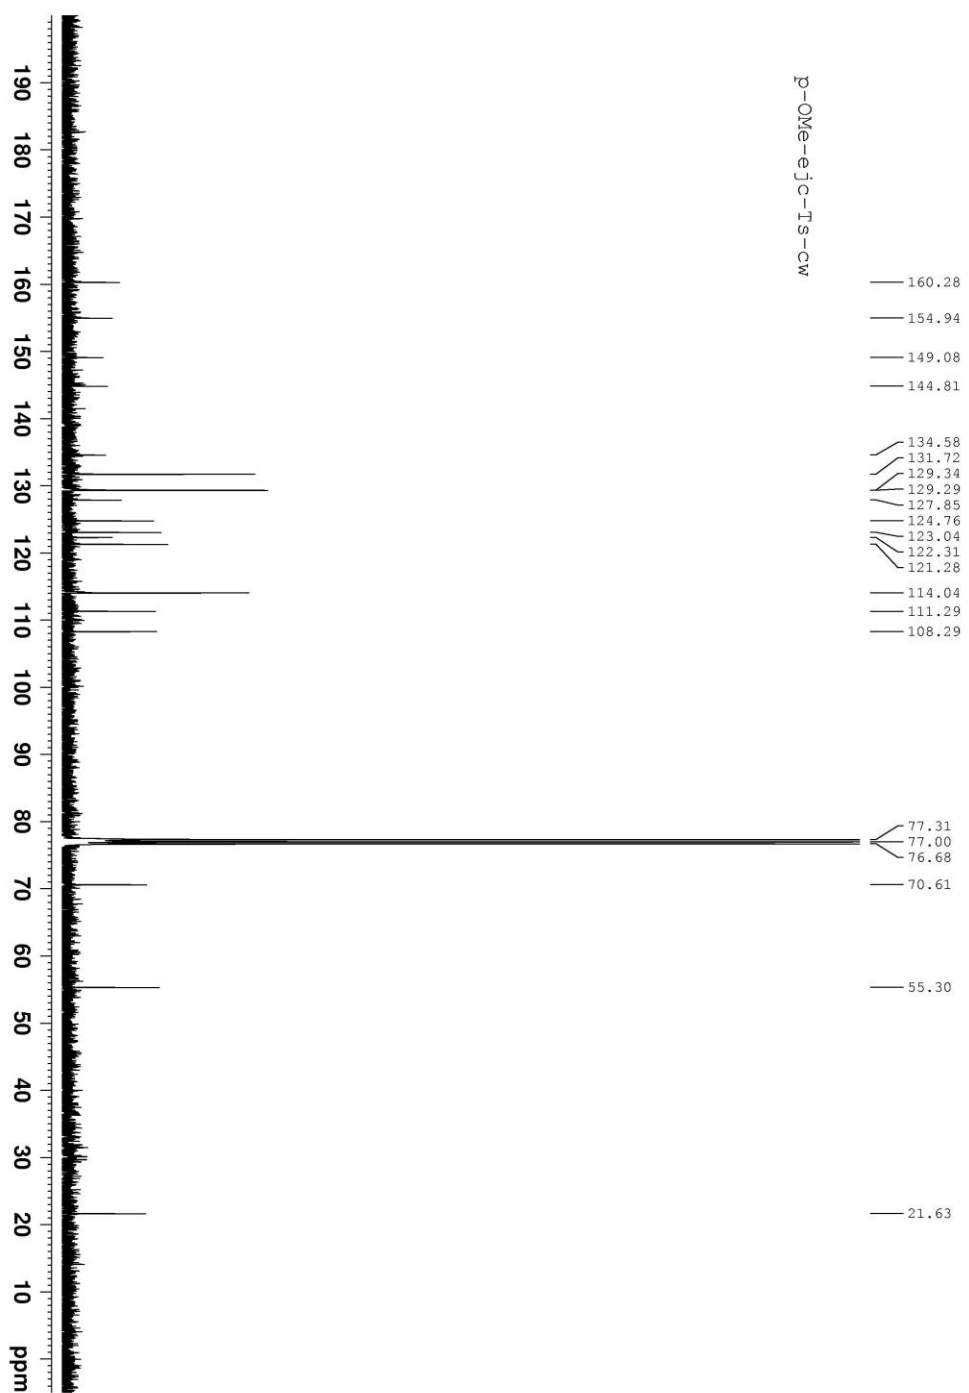

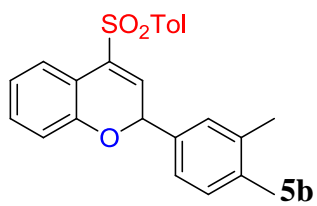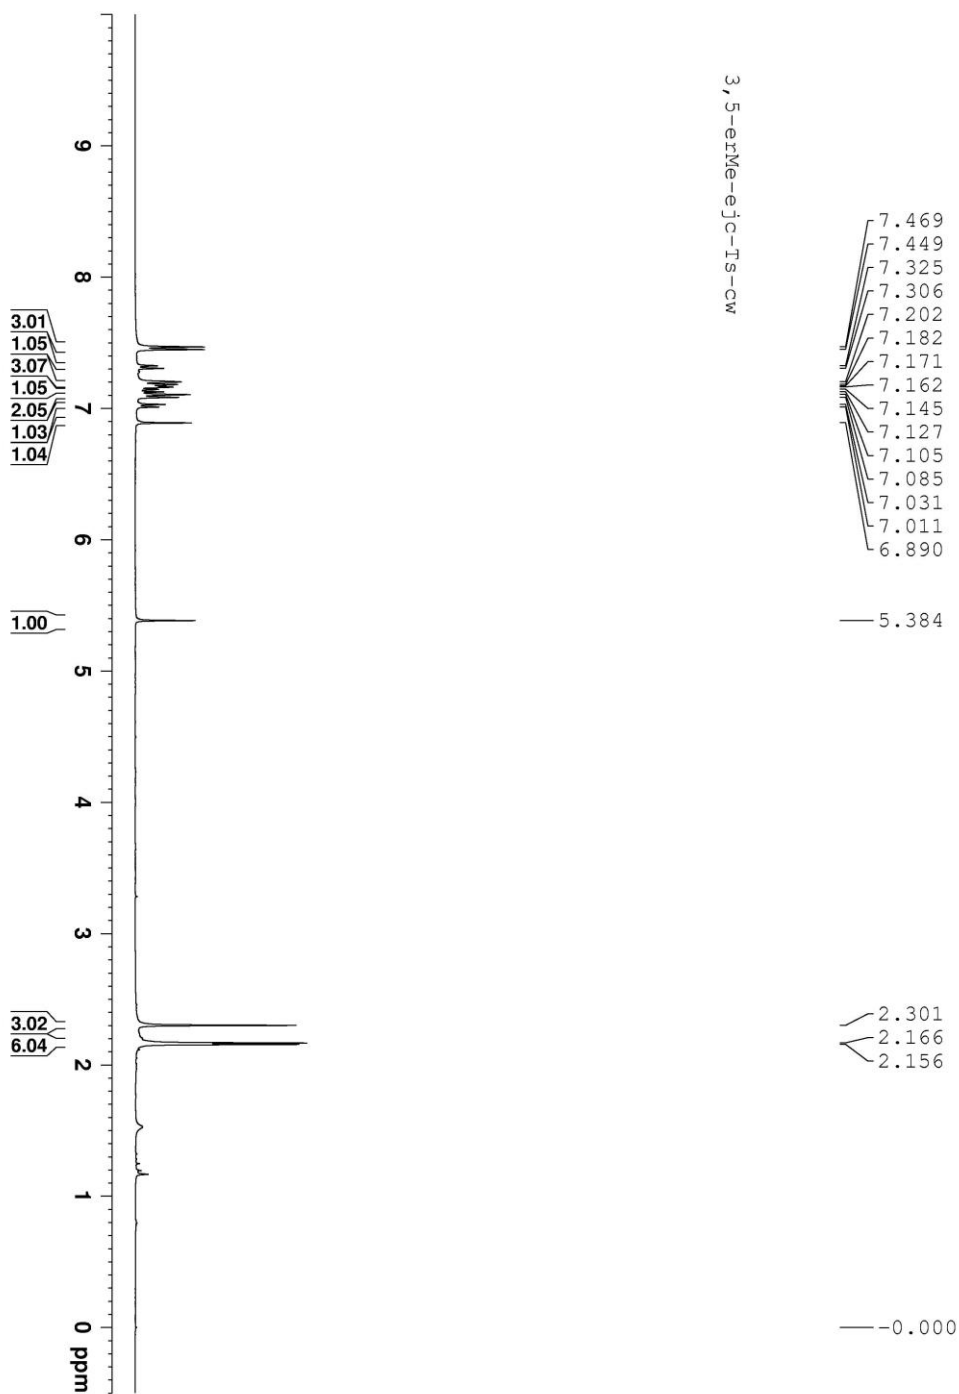

3,5-erjjajj-ejc-Is-cw

- 154.88
- 149.25
- 144.74
- 137.89
- 136.93
- 134.76
- 131.52
- 129.85
- 129.29
- 129.27
- 127.89
- 127.79
- 127.60
- 124.68
- 122.97
- 121.24
- 111.26
- 108.19
  
- 77.32
- 77.00
- 76.68
- 70.98
  
- 21.58
- 19.74
- 19.51

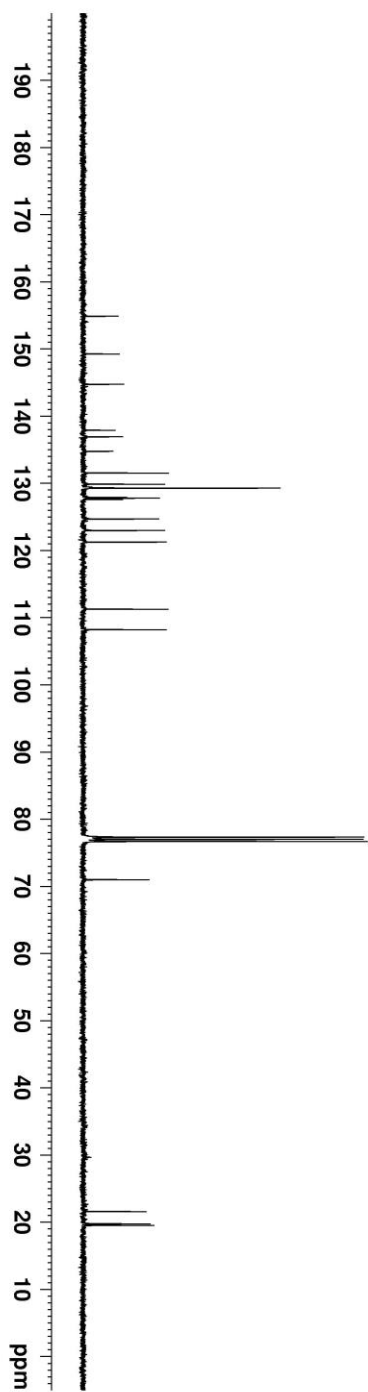

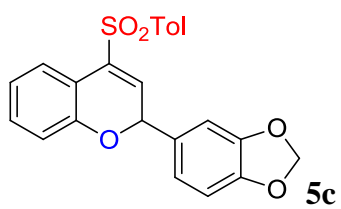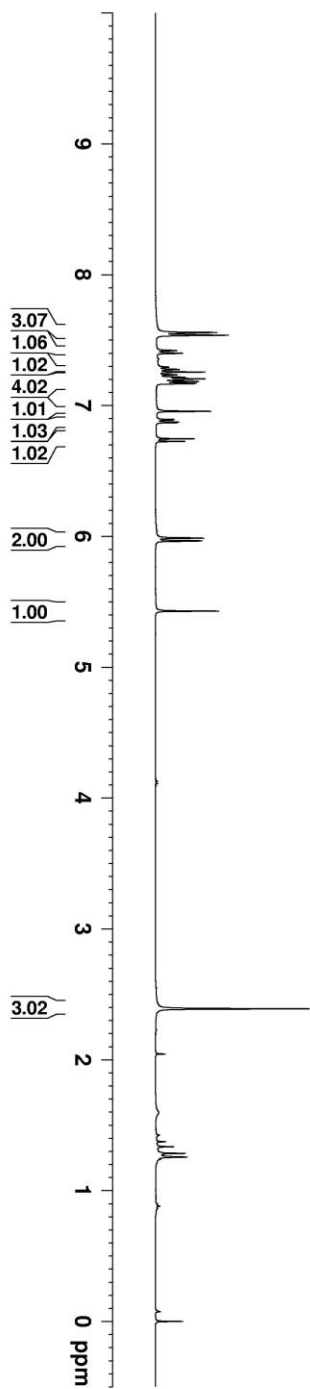

erjiayangji-ejc-Ts-cw

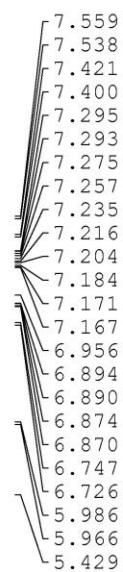

— 2.389

— -0.000

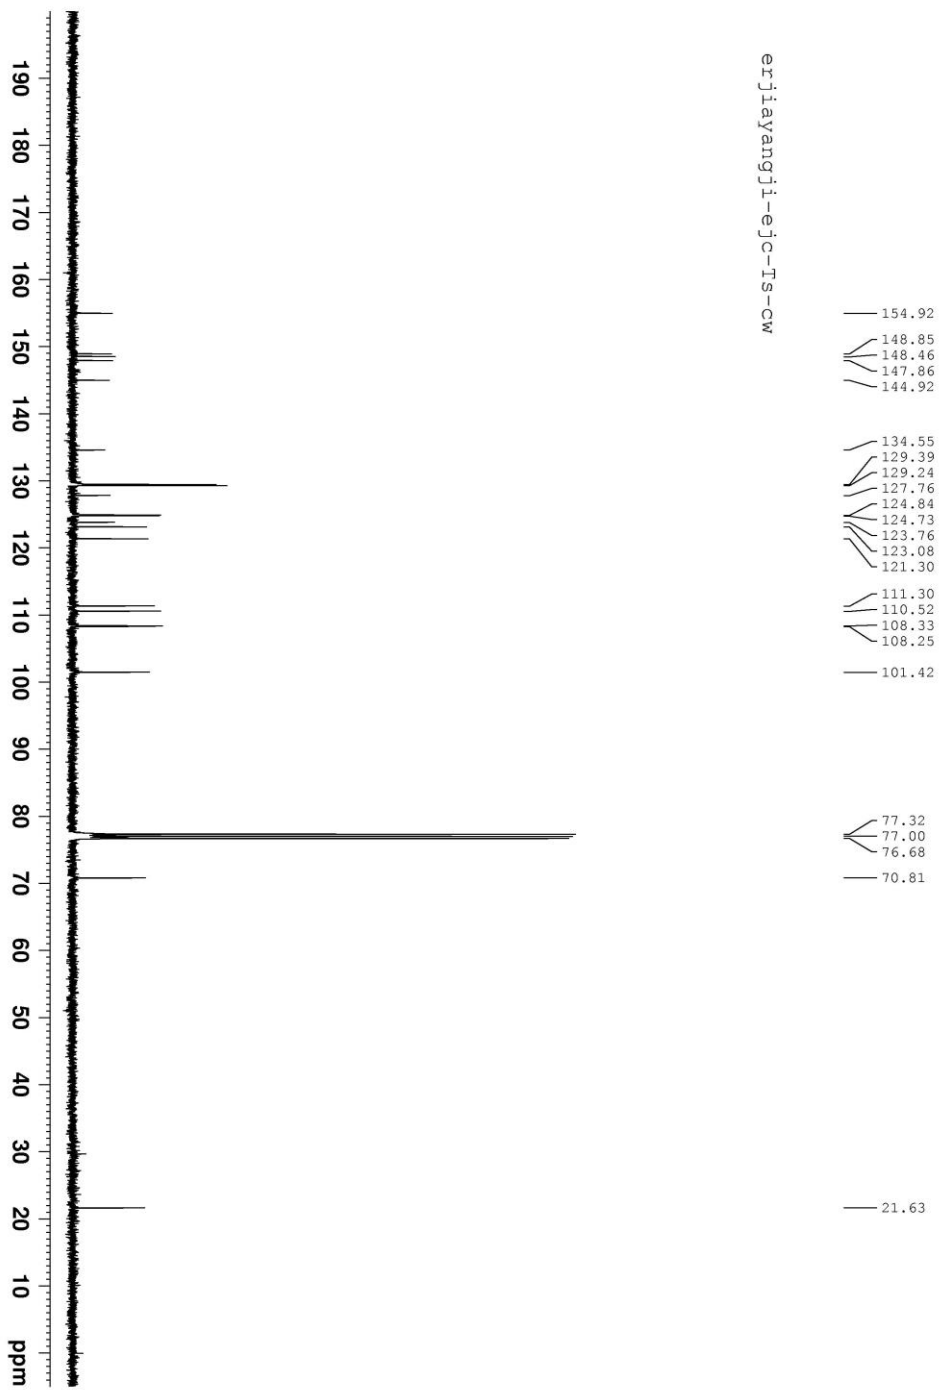

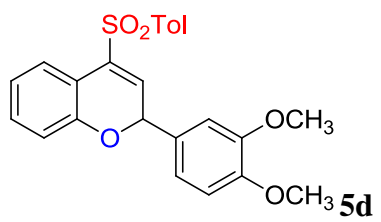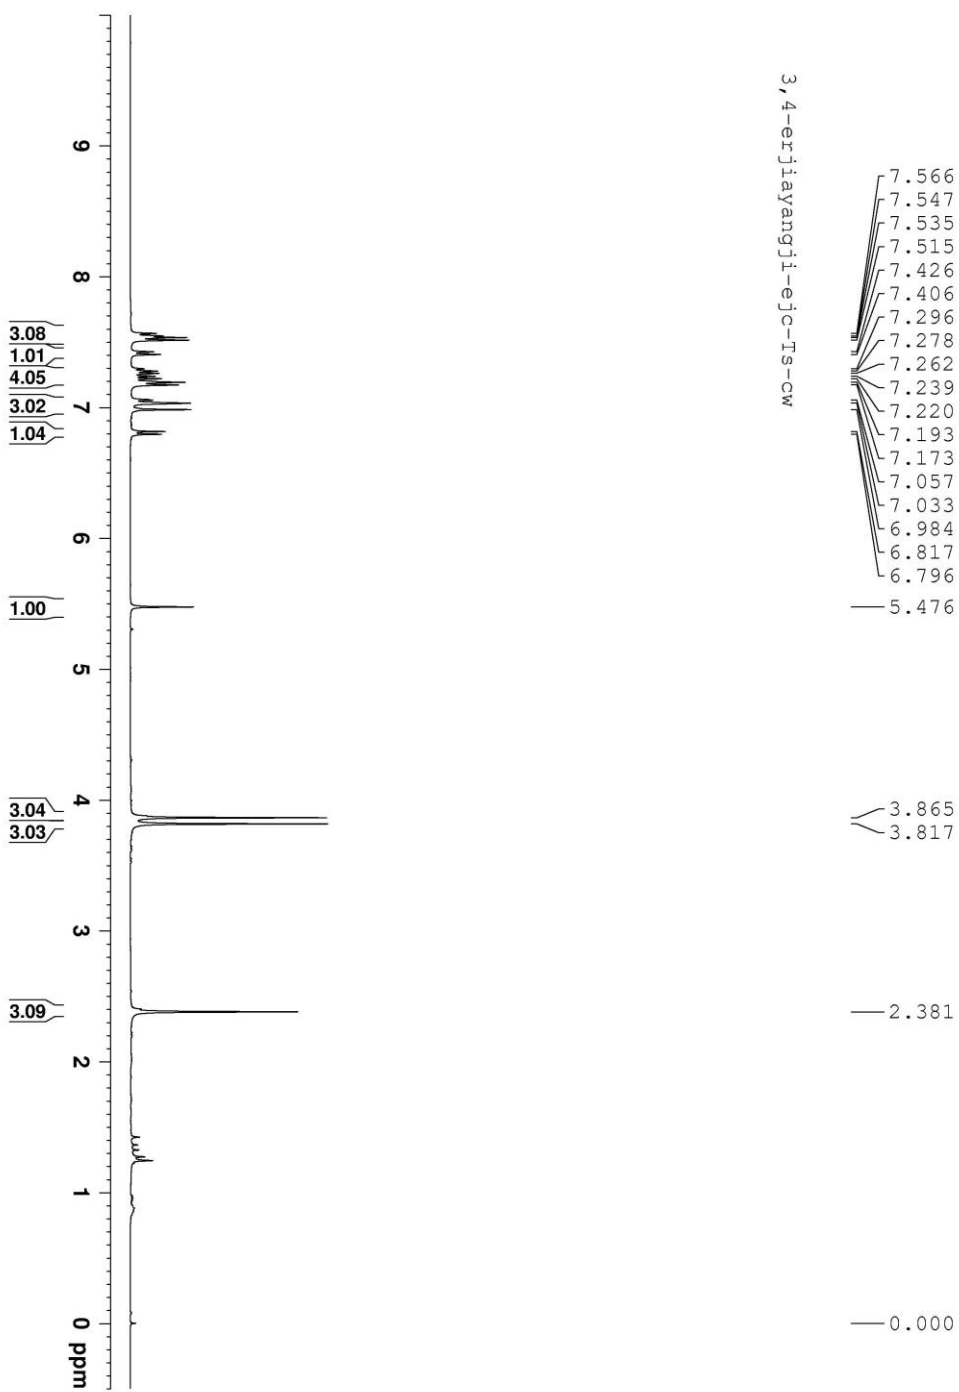

3,4-erjjayangji-ejc-ts-cw

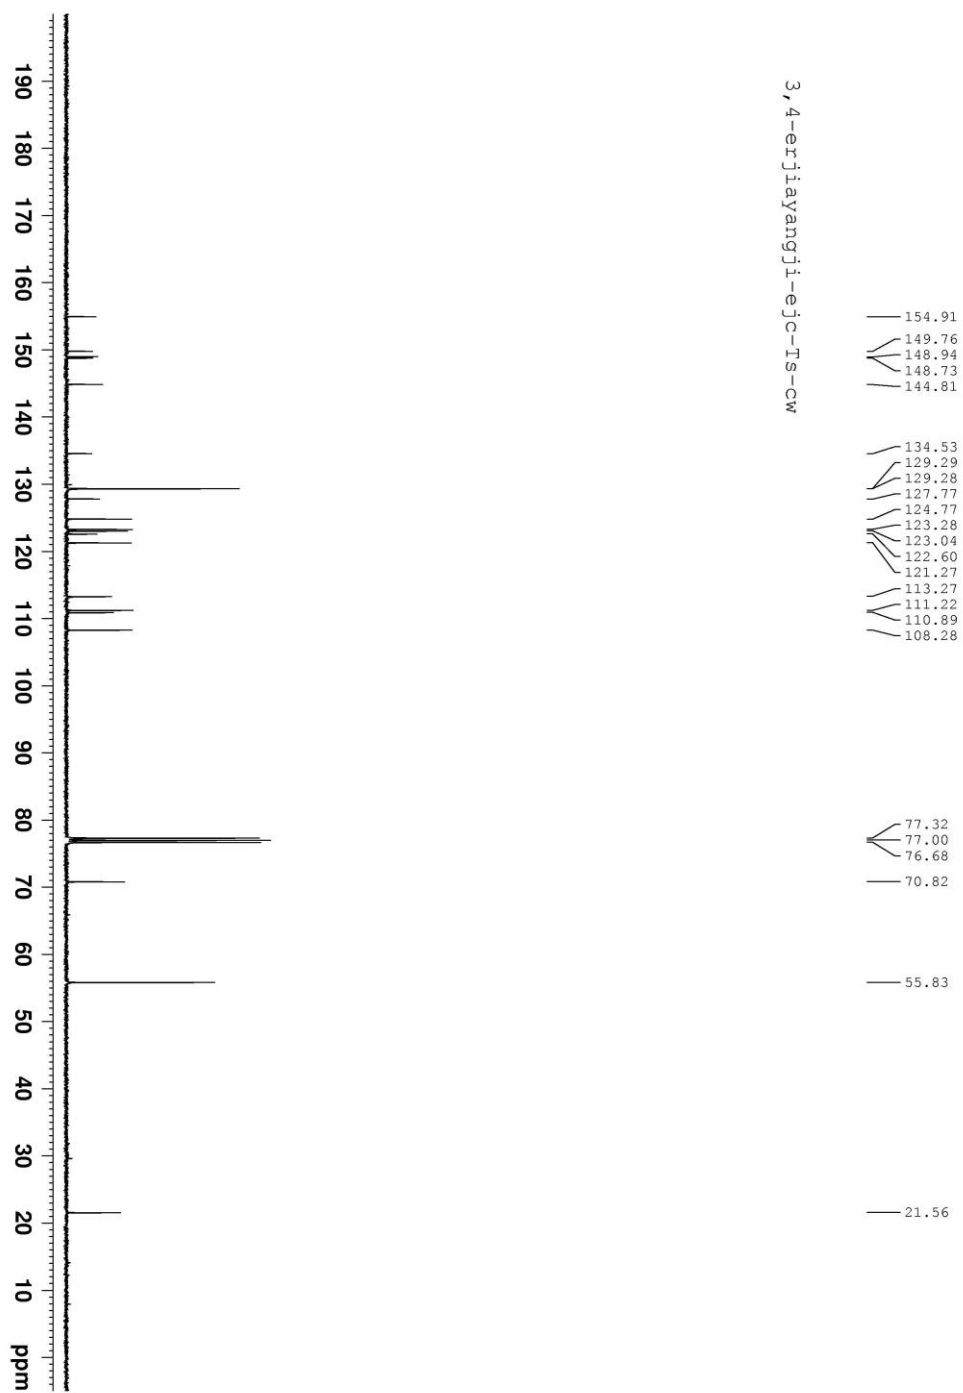

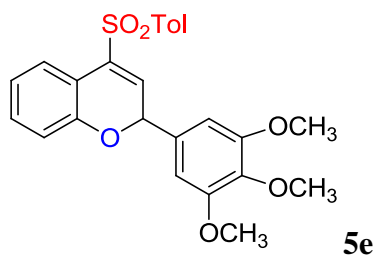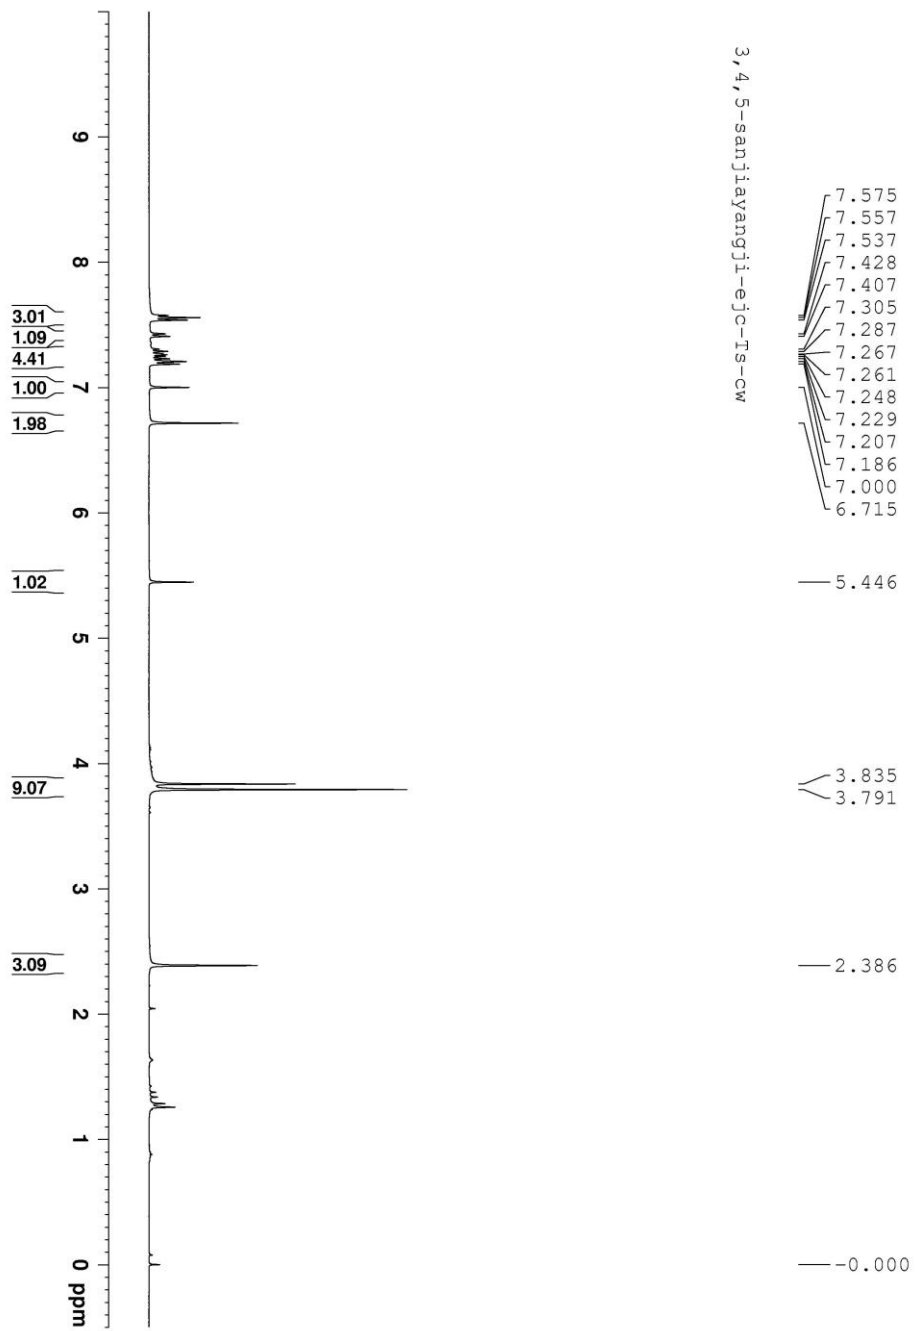



3,4,5-sanjiayangji-ejc-Ts-CW

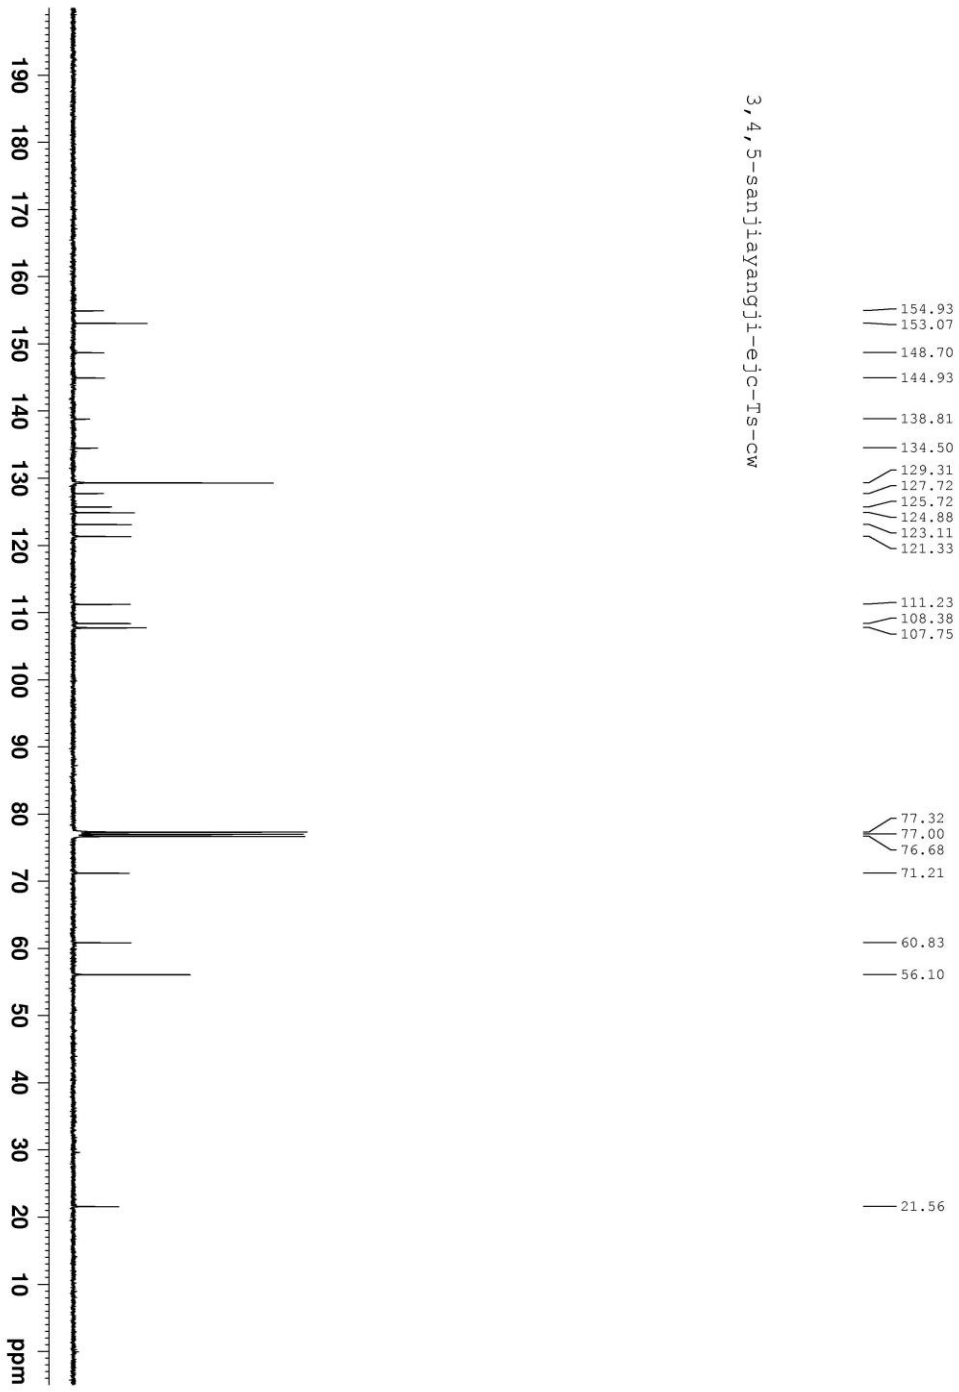

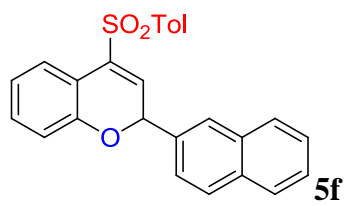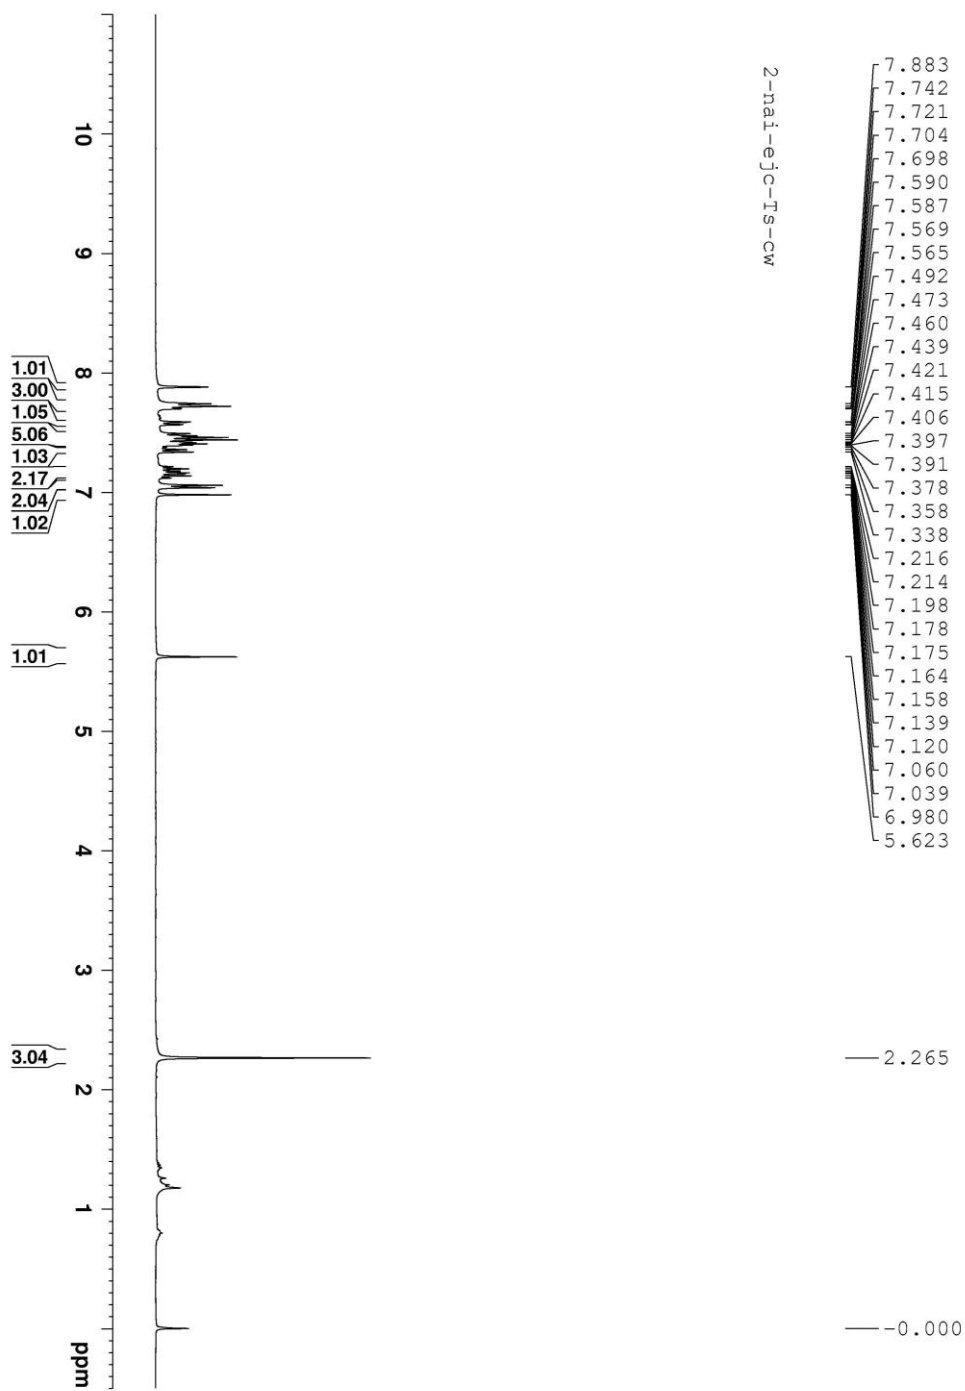

2-nal-ejc-Ts-CW

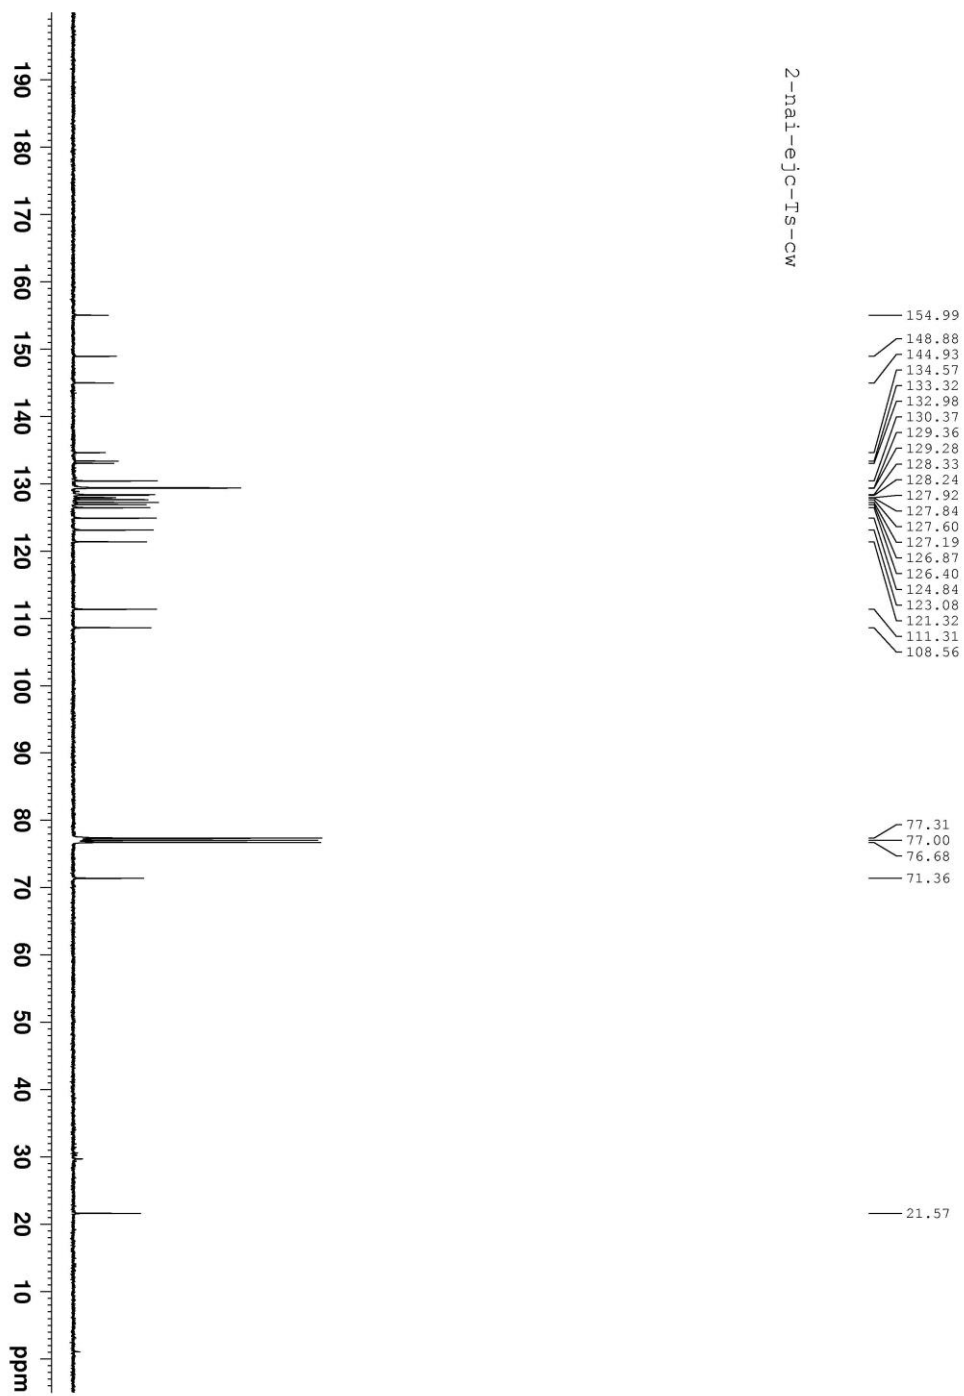

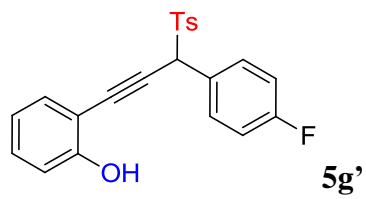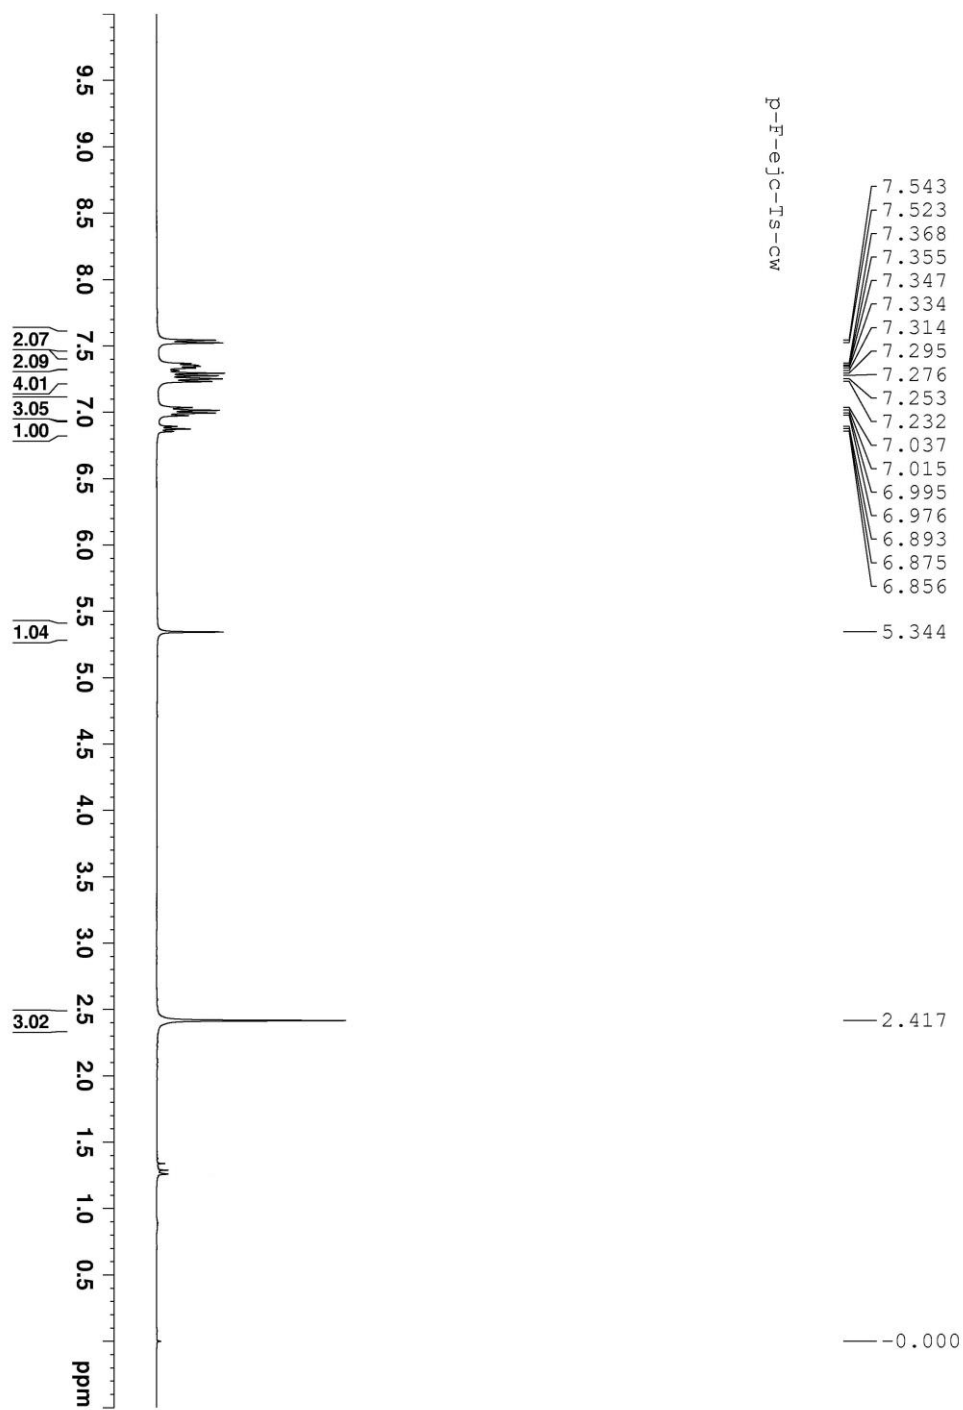

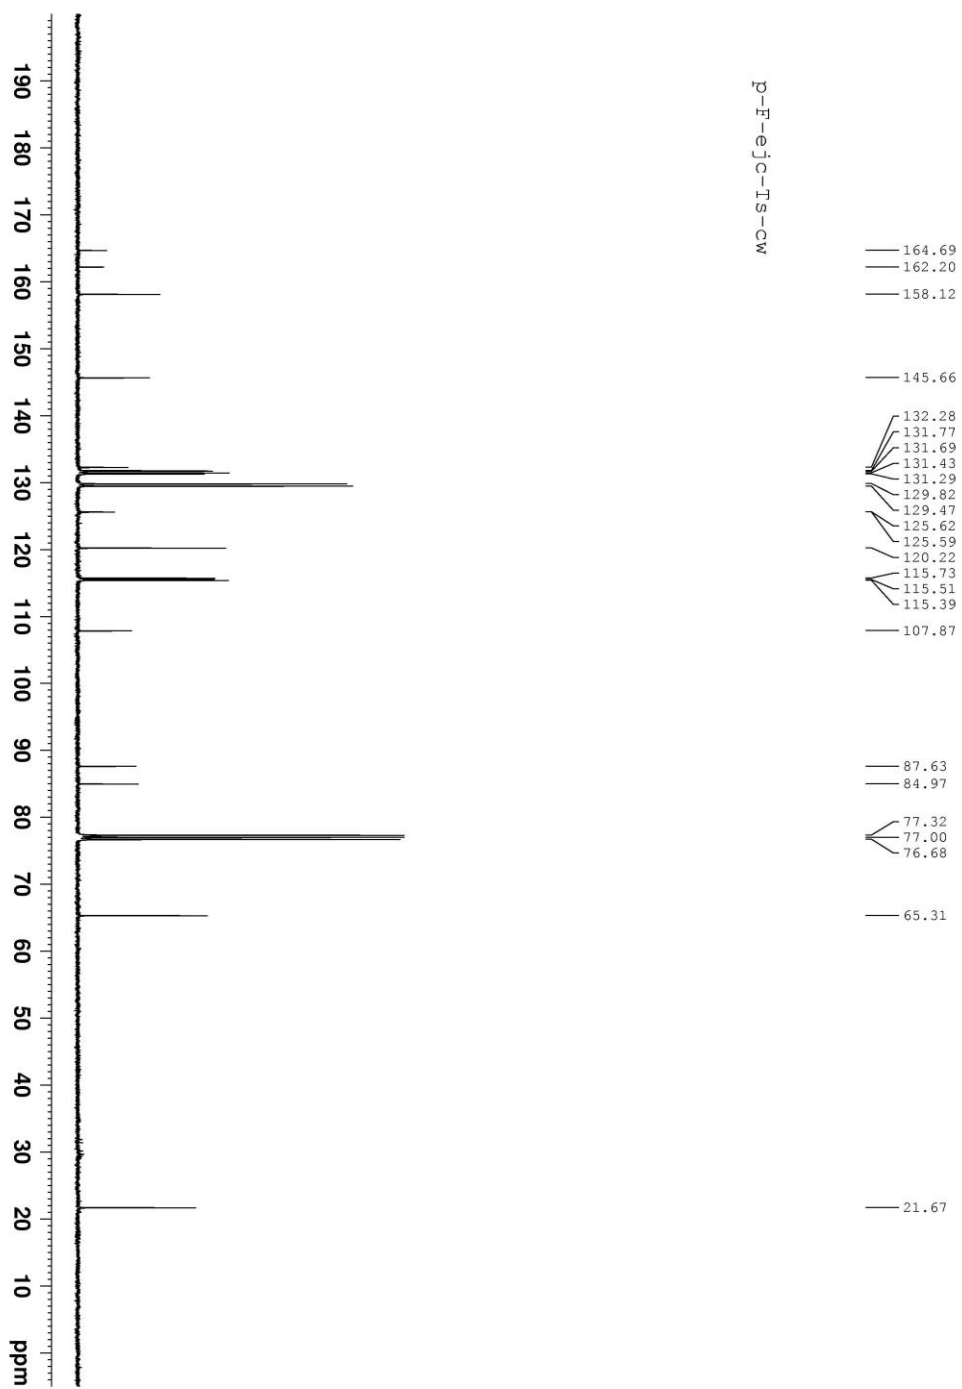

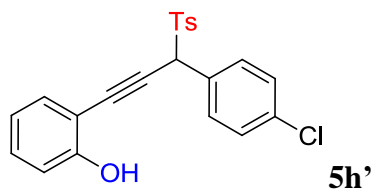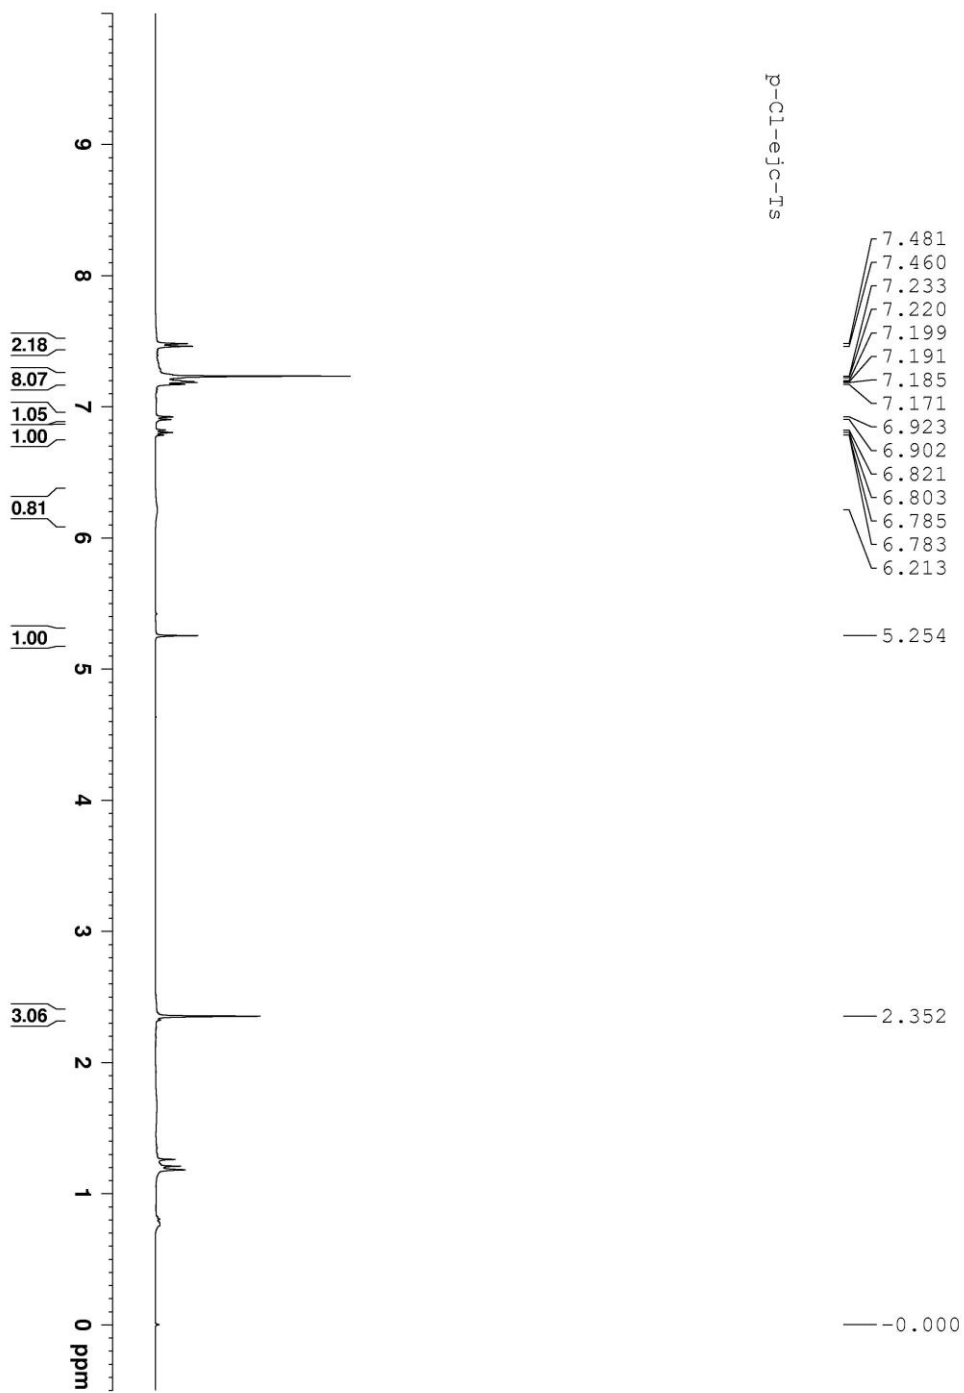

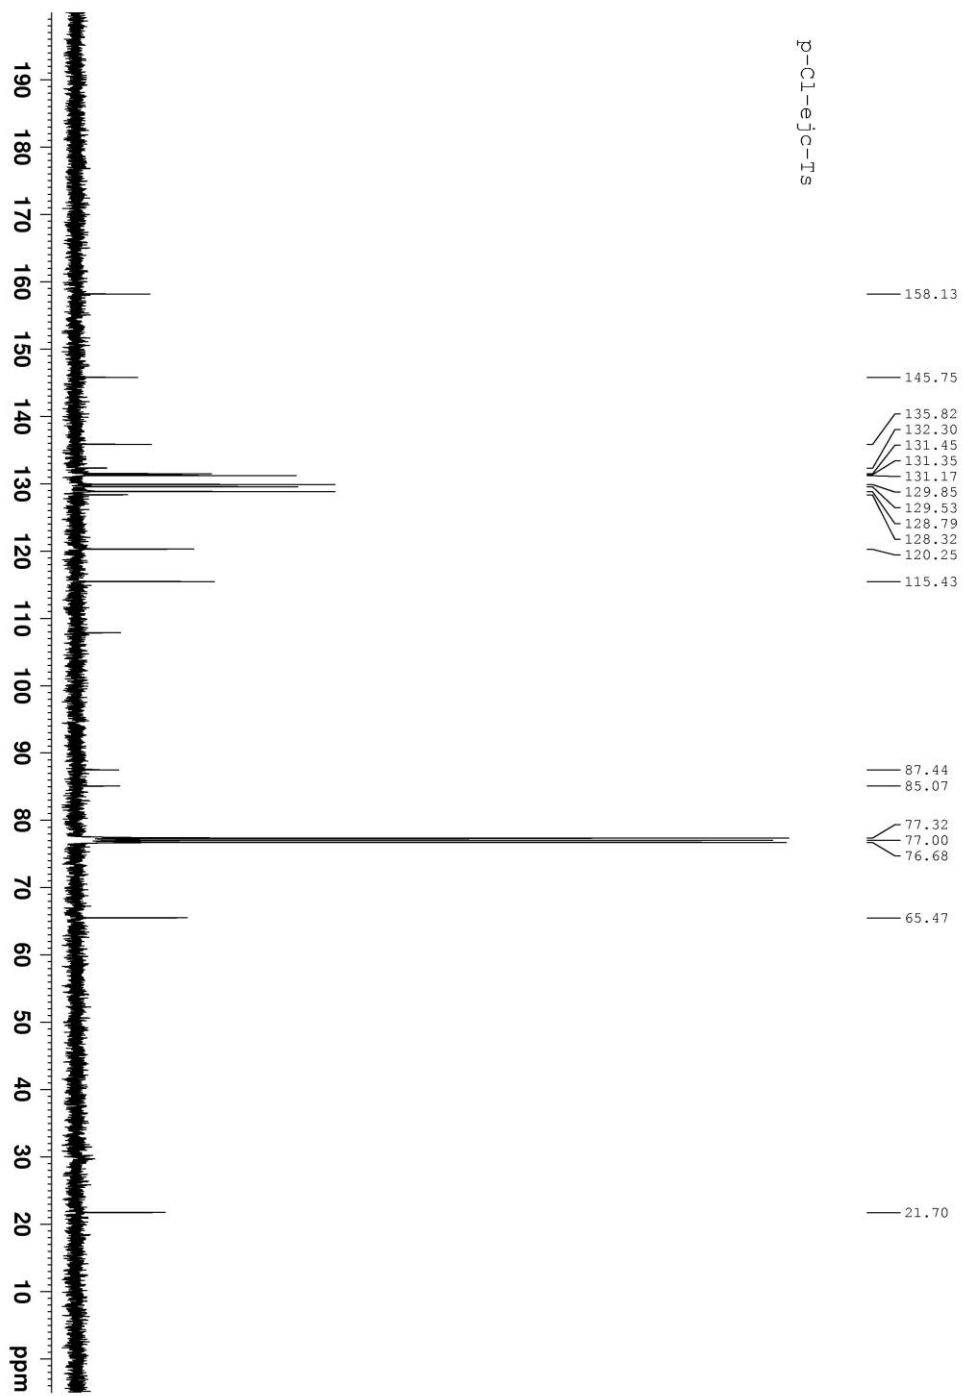

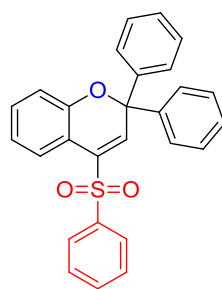

**3aa**

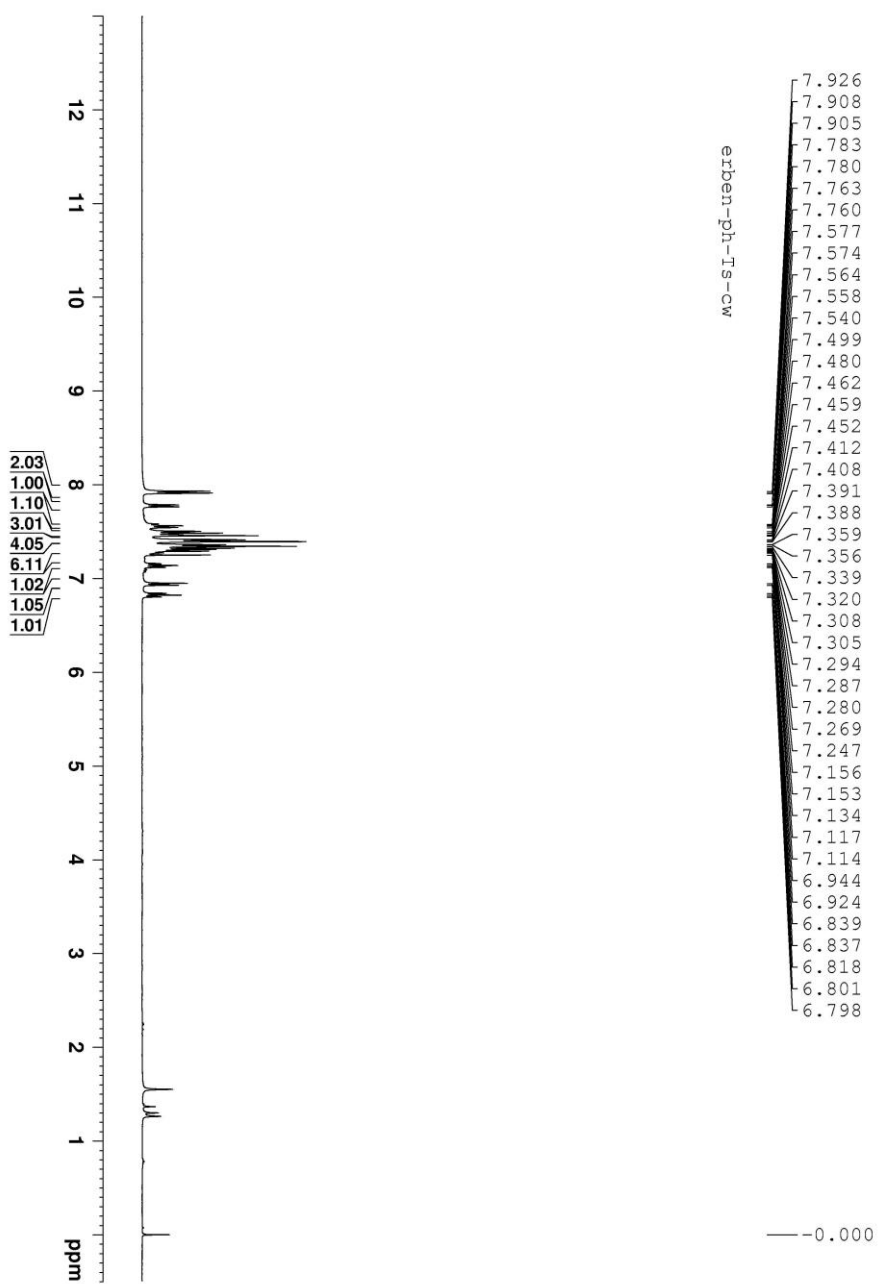



erben-ph-Ts-cw

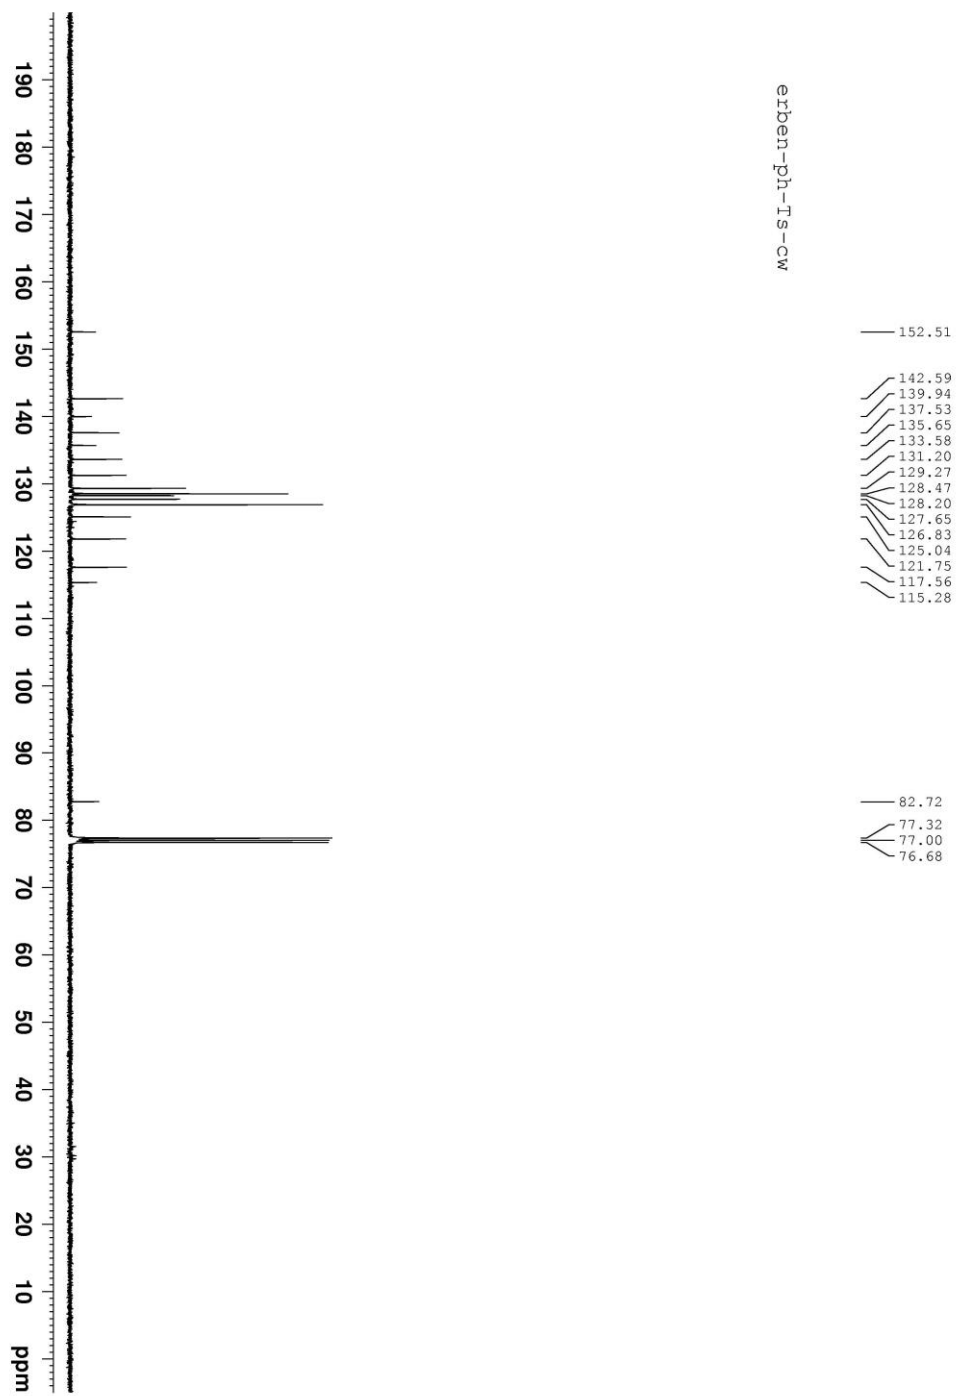

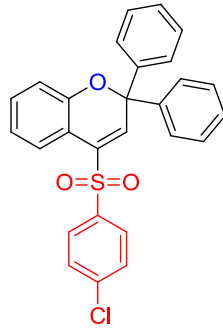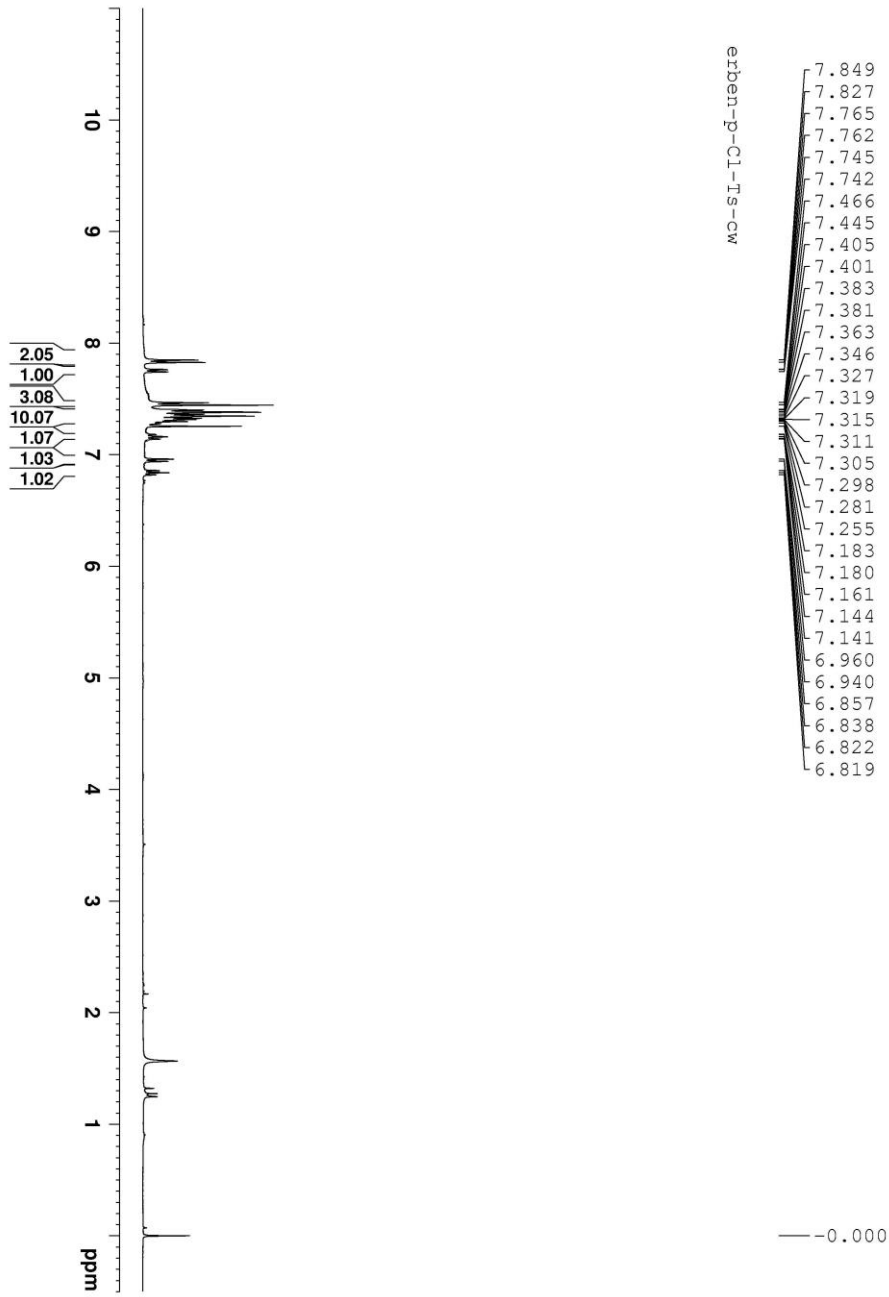

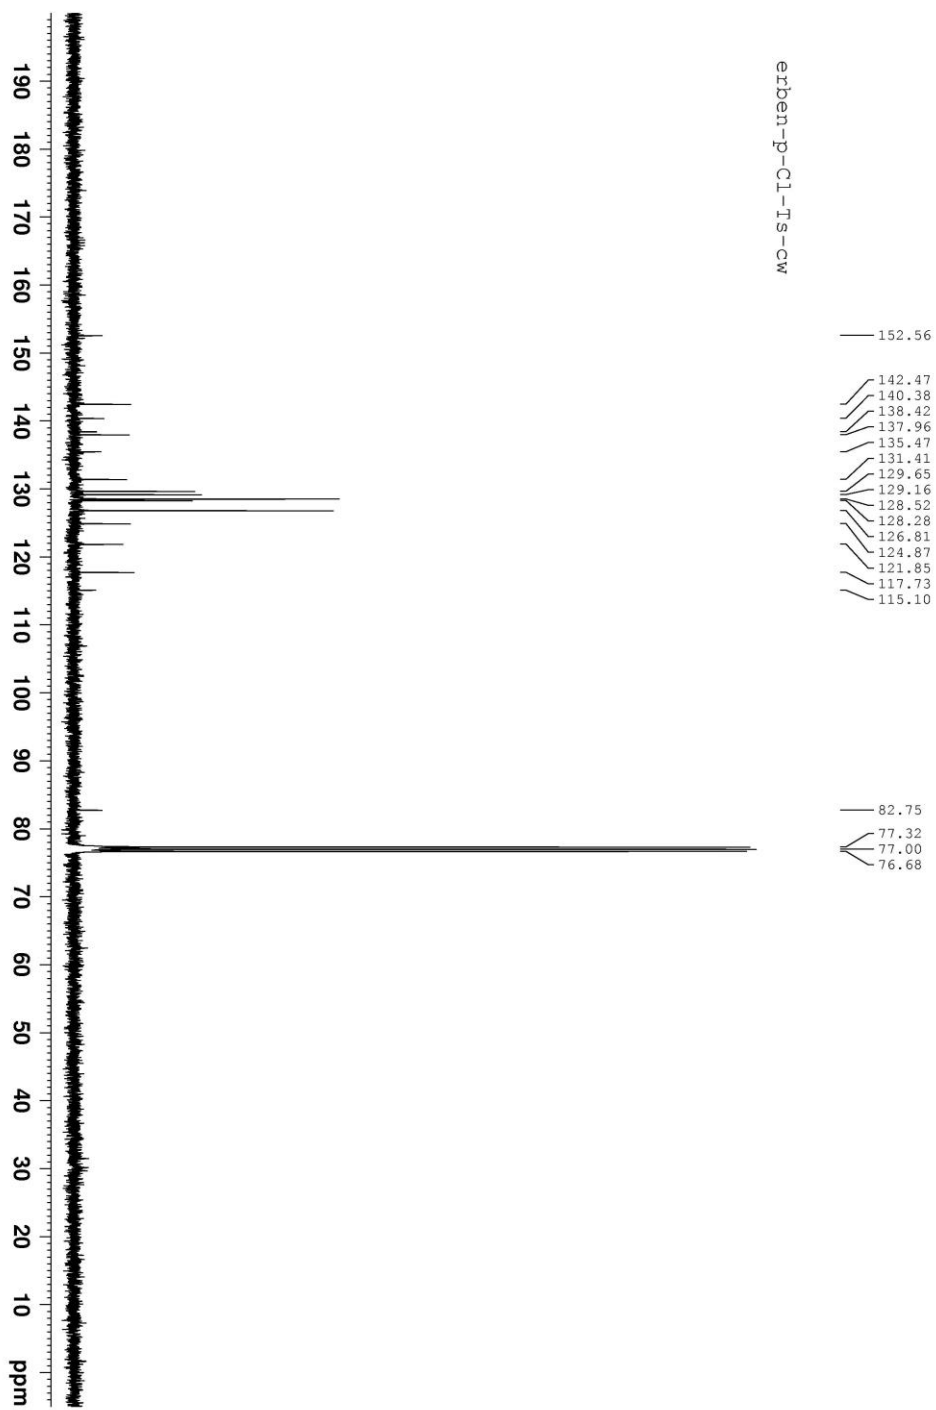

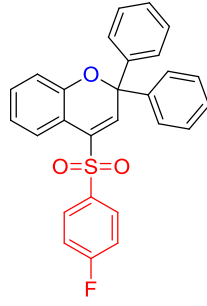

**3ac**

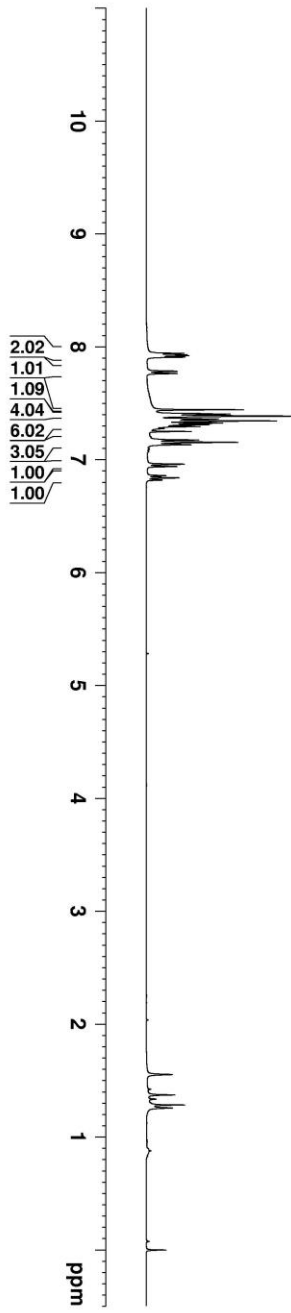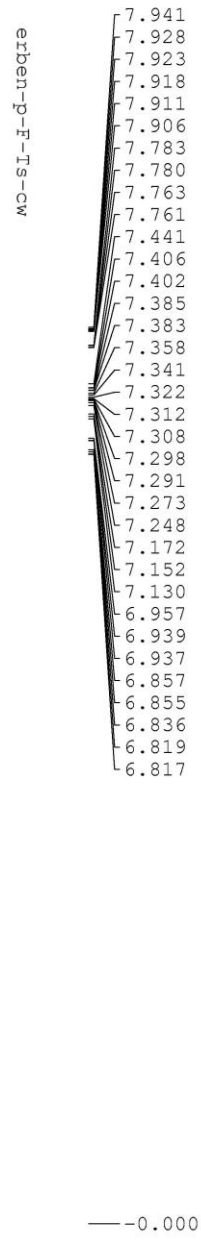

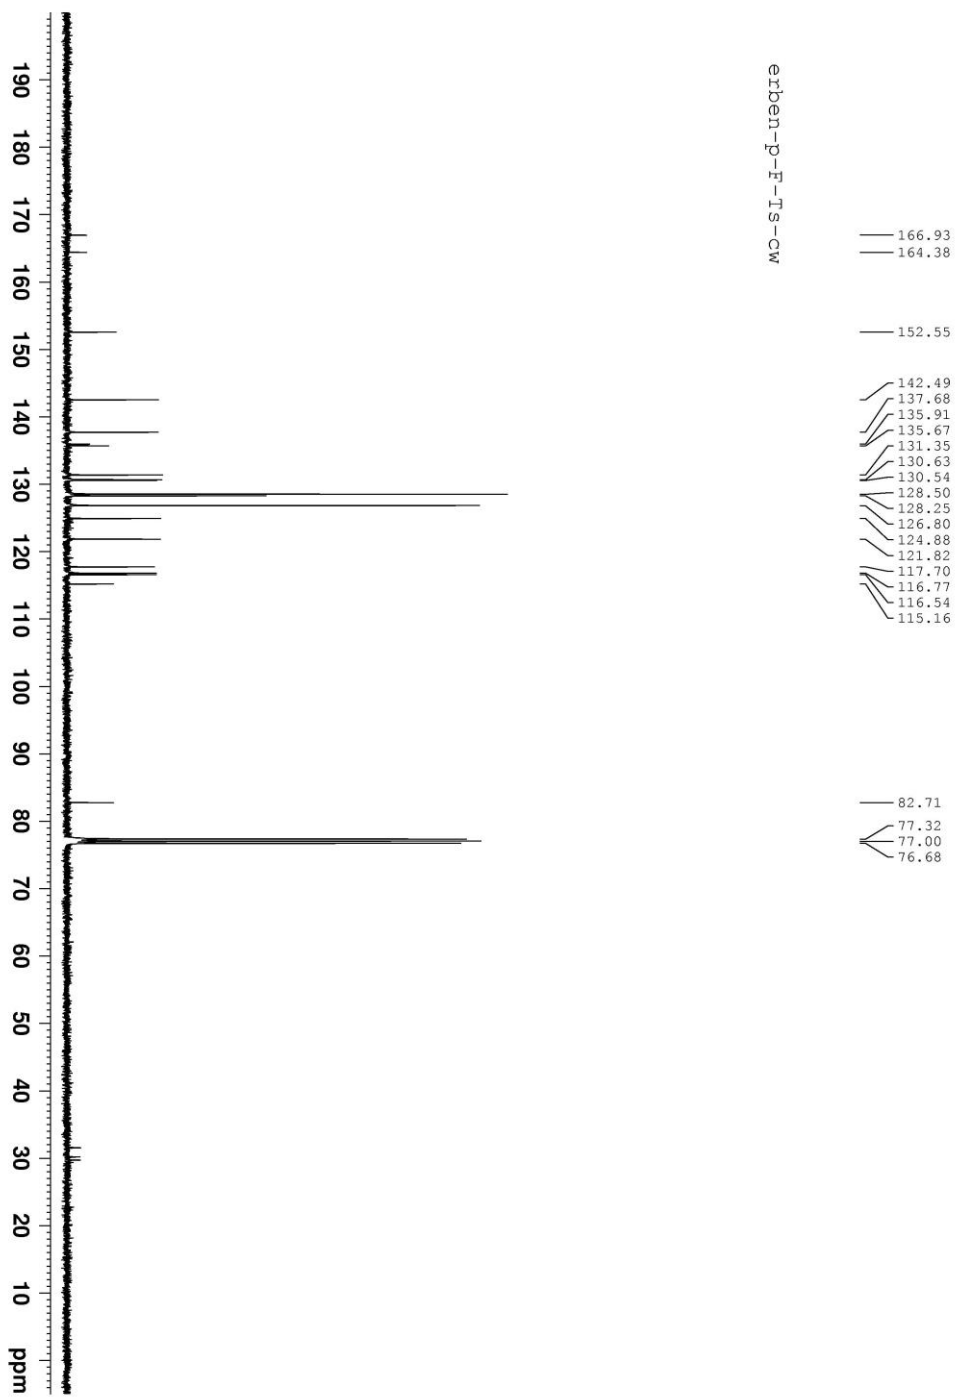

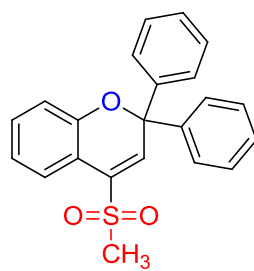

3ad

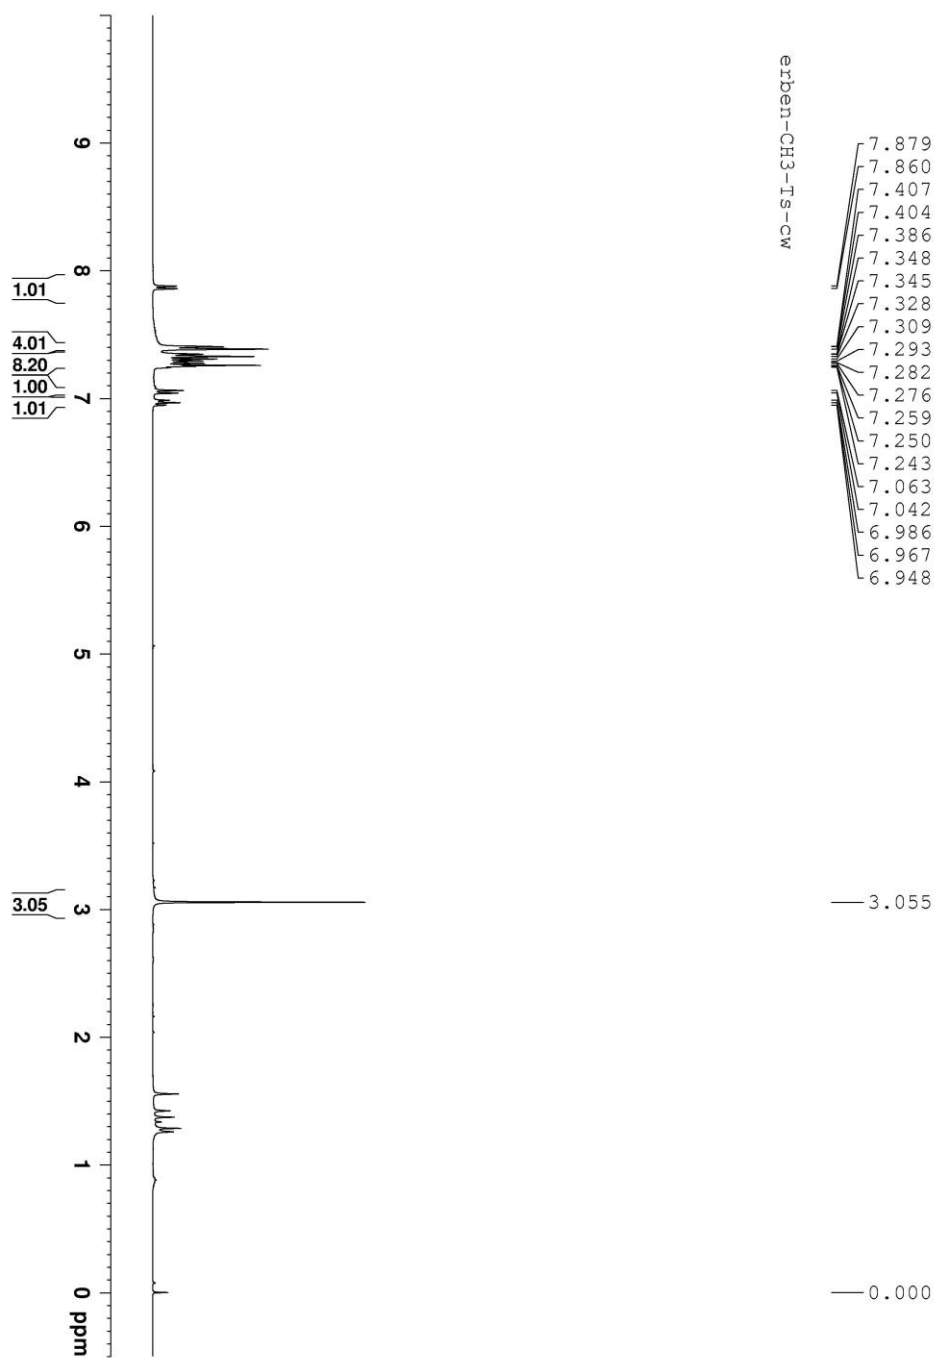

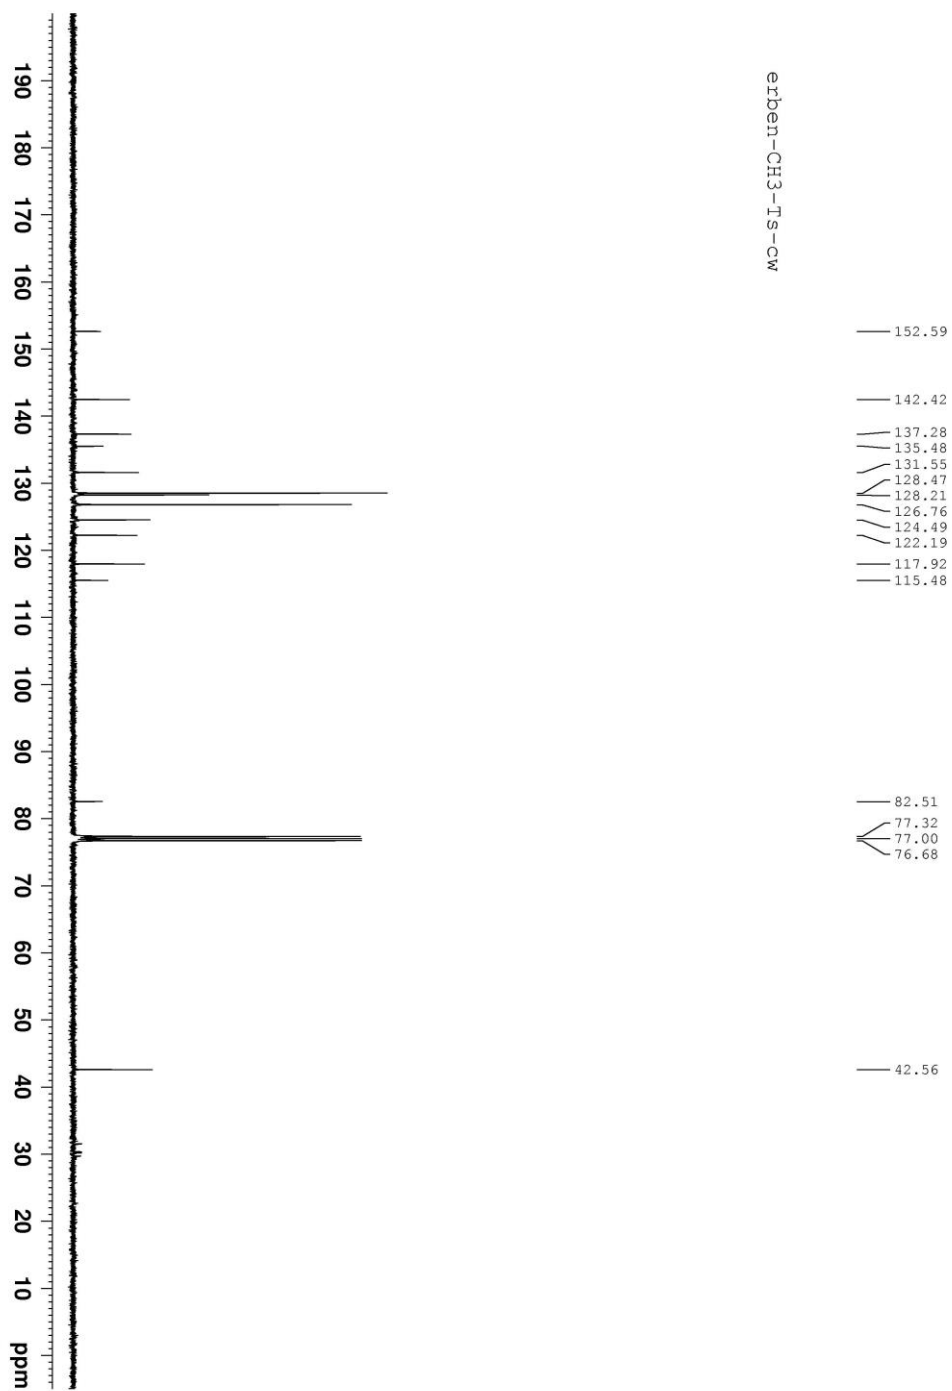

Supplement: c9qo00712a2.pdf [file c9qo00712a2.pdf]
