# Supplementary material for: TFA-promoted sulfonation/cascade cyclization of 2-propynolphenols with sodium sulfinates to 4-sulfonyl 2H-chromenes under metal-free conditions
Source: Royal Society of Chemistry journal article supplement (doi:10.1039/c9qo00712a), 2019-01-01
Supplement: c9qo00712a1.xlsx [file c9qo00712a1.xlsx]

## Sheet: Sheet1
Characterisation Checklist
Manuscript ID:	QO-RES-06-2019-000712
Submitting Author:	Tao Yang, Peihao Kou, Fengyan Jin, Xian-Rong Song,Jiang Bai, Haixin Ding, Qiang Xiao, Yong-Min Liang
Manuscrtipt Title:	TFA-Promoted Sulfonation/Cascade Cyclization of 2-Propynolphenols with Sodium Sulfinates to 4-Sulfonyl 2H-Chromenes under Metal-free Conditions
1. For each compound, type a single 'X" in the cell corresponding to the type data reported in the manuscript or ESI. 2. Save the completed checklist as a ".xls" or ".xlsx" file, even on a non-Windows computer. During submission, upload the saved file together with your manuscript, and select “Characterization Checklist” as the file designation.
Compounds (structure or number)	New	Known with reference(s) cited	Yield	Physucak state / mp if cryst. Colid	IR	UV-Vis	1H NMR	13C NMR	2D NMR	Copy of NMR spectrum in ESI	MS	HRMS	Elemental Analysis	Specific optical rotation	GC/ HPLC	Copy of chromatogram in ESI	X-ray (ORTEP and CIF in ESI)	Notes
3a	X		X	X			X	X		X		X					X
3b	X		X	X			X	X		X		X
3c	X		X	X			X	X		X		X
3d	X		X	X			X	X		X		X
3e	X		X	X			X	X		X		X
3f	X		X	X			X	X		X		X
3g	X		X	X			X	X		X		X
3h	X		X	X			X	X		X		X
3i	X		X	X			X	X		X		X
3j	X		X	X			X	X		X		X
3k	X		X	X			X	X		X		X
3l	X		X	X			X	X		X		X
3m	X		X	X			X	X		X		X
3n	X		X	X			X	X		X		X
3o	X		X	X			X	X		X		X
3p'	X		X	X			X	X		X		X
3q'	X		X	X			X	X		X		X
3aa	X		X	X			X	X		X		X
3ab	X		X	X			X	X		X		X
3ac	X		X	X			X	X		X		X
3ad	X		X	X			X	X		X		X
5a	X		X	X			X	X		X		X
5b	X		X	X			X	X		X		X
5c	X		X	X			X	X		X		X
5d	X		X	X			X	X		X		X
5e	X		X	X			X	X		X		X
5f	X		X	X			X	X		X		X
5g'	X		X	X			X	X		X		X
5h'	X		X	X			X	X		X		X
6		X	X
